# Supplementary material for: MicroRNAome of Porcine Pre- and Postnatal Development
Source: PLoS One. 2010 Jul 12;5(7):e11541. doi: 10.1371/journal.pone.0011541 (PMC2902522; doi:10.1371/journal.pone.0011541)
Supplement: Table S1 — Sample sets information in this study. (0.02 MB XLS) [file pone.0011541.s008.xls]

## Sheet: Sheet1
Supplementary Table S1. Sample sets information in this study
*Before day 49 during post-conception period the sexual characteristics were not visible, therefore the gender of the fetuses at day 30 and 45 was determined using a PCR-based method.
Library name	Sample type	Time (day)	Sample composition	Biological replicates	Additional method*
E30d	fetuses (prenatal)	30 (after insemination)	whole body tissue	3F (female), 3M (male)	Sex determination
E45d	fetuses (prenatal)	45 (after insemination)	whole body tissue	3F, 3M	Sex determination
E60d	fetuses (prenatal)	60 (after insemination)	whole body tissue (bone removed)	3F, 3M
E75d	fetuses (prenatal)	75 (after insemination)	whole body tissue (bone removed)	3F, 3M
E90d	fetuses (prenatal)	90 (after insemination)	whole body tissue (bone removed)	3F, 3M
E105d	fetuses (prenatal)	105 (after insemination)	whole body tissue (bone removed)	3F, 3M
Birth	pigs (postnatal)	Birth (0 day)	mixture of 60 types tissues	3F, 3M
30d	pigs (postnatal)	30 (after birth, weaning)	mixture of 60 types tissues	3F, 3M
120d	pigs (postnatal)	120 (after birth)	mixture of 60 types tissues	3F, 3M
180d	pigs (postnatal)	180 (after birth)	mixture of 60 types tissues	3F, 3M
