# Supplementary material for: MicroRNAome of Porcine Pre- and Postnatal Development
Source: PLoS One. 2010 Jul 12;5(7):e11541. doi: 10.1371/journal.pone.0011541 (PMC2902522; doi:10.1371/journal.pone.0011541)
Supplement: Table S2 — Catalog of 60 types tissues mixed for four postnatal sample sets (Birth, 30 d, 120 d and 180 d). (0.03 MB XLS) [file pone.0011541.s009.xls]

## Sheet: Sheet1
Supplementary Table S2. Catalog of 60 types tissues mixed for four postnatal sample sets (Birth, 30d, 120d and 180d)
ID	Group	Tissue / Organ
1	15 internal organs	appendix
2		bladder
3		colon
4		duodenum
5		esophagus
6		gallbladder
7		heart
8		ileum
9		jejunum
10		kidney
11		liver
12		lung
13		rectum
14		spleen
15		stomach
16	four types of skeletal muscles distributed in different sites	diaphragm muscle
17		longissimus dorsi muscle
18		psoas major muscle
19		rhomboid muscle
20	ten types of adipose tissues distributed in different sites	abdominal fat
21		greater omentum
22		intermuscular fat
23		intracolonic fat
24		leaf fat
25		lesser omentum
26		pericardial fat
27		perihepatic fat
28		upper layers of backfat
29		inner layers of backfat
30	brain tissues	whole brain (homogenate)
31	nine generative organs	cervix (♀)
32		ovary (♀)
33		oviduct (♀)
34		uterus (♀)
35		epididymis (♂)
36		penis (♂)
37		prostate (♂)
38		seminal vesicle (♂)
39		testis (♂)
40	five gland tissues	adrenal
41		pancreas
42		thymus
43		thyroid
44		mammary
45	16 other tissues/organs	aorta
46		blood
47		bone marrow
48		ear
49		mesenteric lymph node
50		oesophagus
51		optic nerve – chiasm
52		pulmonary artery
53		retina
54		skin
55		spinal marrow
56		tongue
57		trachea
58		pulmonary vein
59		portal vein
60		ureter
