# Supplementary material for: MicroRNAome of Porcine Pre- and Postnatal Development
Source: PLoS One. 2010 Jul 12;5(7):e11541. doi: 10.1371/journal.pone.0011541 (PMC2902522; doi:10.1371/journal.pone.0011541)
Supplement: Table S9 — The alignments of isomiRs for pre-miRNAs (PN(a) type) that can be mapped to pig genome or EST. (2.38 MB XLS) [file pone.0011541.s016.xls]

## Sheet: Sheet1
Supplementary Table S9. The alignments of isomiRs for pre-miRNAs (PN(a) type) that can be mapped to pig genome or EST
(1). Identical bases in the multiple sequence alignment are shown as dots. (2). age: Ateles geoffroyi, bta: Bos taurus, cfa: Canis familiaris, cgr: Cricetulus griseus, ggo: Gorilla gorilla, hsa: Homo sapiens, lca: Lemur catta, lla: Lagothrix lagotricha, mdo: Monodelphis domestica, mml: Macaca mulatta, mmu: Mus musculus, mne: Macaca nemestrina, oan: Ornithorhynchus anatinus, oar: Ovis aries, pbi: …
Alignment	Sequenced sequence	Pre-miRNA arm	Mismatch no.	Counts										Total counts in all ten libraries	No. of libraries expressed
				E30d	E45d	E60d	E75d	E90d	E105d	Birth	30d	120d	180d
cluster No. 1
38549755 CTCTTCACTGTGGGATGAGGTAGTAGGTTGTATAGTTTTAGGGTCACACCCACCACTGGGAGATAACTATACAATCTACTGTCTTTCCTAACGTGA 38549850 new hairpin
1 ............................................................................... 79 ptr-let-7a-1
1 ................................................................................ 80 hsa-let-7a-1
1 ...C..................................................................................T...AG 90 mdo-let-7a-1
1 ........................................................................................G.... 93 mmu-let-7a-1
1 ...................... 22	TGAGGTAGTAGGTTGTATAGTT	5p	0	5028	3371	162394	13846	183686	254451	160941	7894	153114	67058	1011783	10
1 ..................... 21	TGAGGTAGTAGGTTGTATAGT	5p	0	170	88	9414	2049	14875	22118	14732	686	15174	7309	86615	10
1 ....................... 23	TGAGGTAGTAGGTTGTATAGTTT	5p	0	222	132	10302	865	12993	19393	11239	657	11656	5755	73214	10
1 ..................... 21	GAGGTAGTAGGTTGTATAGTT	5p	0	216	63	4314	206	4945	4381	4161	1407	4476	66	24235	10
1 .................... 20	TGAGGTAGTAGGTTGTATAG	5p	0	12	11	873	880	1379	2403	2012	81	2395	1166	11212	10
1 .................... 20	AGGTAGTAGGTTGTATAGTT	5p	0	20	3	469	28	548	433	426	137	525		2589	9
1 .................... 20	GAGGTAGTAGGTTGTATAGT	5p	0	10	3	290	30	423	415	495	120	460	5	2251	10
1 ...................... 22	GAGGTAGTAGGTTGTATAGTTT	5p	0	12	5	297	16	406	385	374	103	478		2076	9
1 ................... 19	TGAGGTAGTAGGTTGTATA	5p	0	6		104	151	147	235	229	12	390	154	1428	9
1 .................. 18	TGAGGTAGTAGGTTGTAT	5p	0			124	57	130	199	282	17	359	117	1285	8
1 ........................ 24	TGAGGTAGTAGGTTGTATAGTTTT	5p	0	4	3	180	20	213	270	152	10	223	95	1170	10
1 ................... 19	GAGGTAGTAGGTTGTATAG	5p	0			20	17	41	43	45	13	70		249	7
1 ..................... 21	AGGTAGTAGGTTGTATAGTTT	5p	0			30		33	45	32	21	57		218	6
1 ................... 19	AGGTAGTAGGTTGTATAGT	5p	0			24	3	38	28	54	10	43		200	7
1 ................ 16	GAGGTAGTAGGTTGTA	5p	0			28	7	19	13	35	24	40		166	7
1 ................ 16	TGAGGTAGTAGGTTGT	5p	0			7	44	11	6	11		27	9	115	7
1 ................. 17	GAGGTAGTAGGTTGTAT	5p	0			8		6	8	8	7	10		47	6
1 .................. 18	GAGGTAGTAGGTTGTATA	5p	0			5		5	4	11		15		40	5
1 ....................... 23	GAGGTAGTAGGTTGTATAGTTTT	5p	0			4		3	7	3		8		25	5
1 .................. 18	AGGTAGTAGGTTGTATAG	5p	0			6				4		8		18	3
1 ....................... 23	ATGAGGTAGTAGGTTGTATAGTT	5p	0			6			7			3		16	3
1 ................... 19	GGTAGTAGGTTGTATAGTT	5p	0								3	4		7	2
1 ................. 17	AGGTAGTAGGTTGTATA	5p	0							3		3		6	2
1 ...................... 23	TGAGGTAGTAGGTTGTATAGTT	5p	0					3		3				6	2
1 ...................... 22	AGGTAGTAGGTTGTATAGTTTT	5p	0									3		3	1
1 ..................G... 22	TGAGGTAGTAGGTTGTATGGTT	5p	1	8444	1913	103258	13200	102651	132853	105918	6827	120975	51853	647892	10
1 ...........A.......... 22	TGAGGTAGTAGATTGTATAGTT	5p	1	1244	1329	91093	5908	116595	114314	77852	8300	125443	57427	599505	10
1 ......................A 22	TGAGGTAGTAGGTTGTATAGTTA	5p	1	380	172	14400	1347	17312	24304	17255	879	16654	7616	100319	10
1 ..................G.. 21	TGAGGTAGTAGGTTGTATGGT	5p	1	290	52	5365	2558	7389	9928	9501	460	11014	5338	51895	10
1 ........G............. 22	TGAGGTAGGAGGTTGTATAGTT	5p	1	1131	315	12457	855	8228	11573	6343	295	6541	2393	50131	10
1 ...........A......... 21	TGAGGTAGTAGATTGTATAGT	5p	1	53	35	4644	754	7697	8103	6003	671	11231	5431	44622	10
1 ..................G.... 23	TGAGGTAGTAGGTTGTATGGTTT	5p	1	308	68	5655	754	5652	8502	6465	388	7964	3623	39379	10
1 ..........A.......... 21	GAGGTAGTAGATTGTATAGTT	5p	1	126	83	4740	171	4844	3851	3811	2633	6775	60	27094	10
1 ...........A........... 23	TGAGGTAGTAGATTGTATAGTTT	5p	1	25	23	3091	188	4227	4458	2952	435	5460	2597	23456	10
1 .................G... 21	GAGGTAGTAGGTTGTATGGTT	5p	1	523	48	3686	266	3696	2816	3714	1480	4791	54	21074	10
1 .................C.... 22	TGAGGTAGTAGGTTGTACAGTT	5p	1	64	171	3920	133	2490	3583	3502	100	1921	295	16179	10
1 ................G..... 22	TGAGGTAGTAGGTTGTGTAGTT	5p	1	25	136	2151	231	1710	2855	2568	152	1557	160	11545	10
1 ...............G...... 22	TGAGGTAGTAGGTTGGATAGTT	5p	1	214	219	2624	49	1123	2110	422	19	362	34	7176	10
1 ................G 16	TGAGGTAGTAGGTTGTG	5p	1		6	440	363	580	908	1278	88	2315	1021	6999	9
1 .....................A 21	TGAGGTAGTAGGTTGTATAGTA	5p	1	7	23	604	708	901	1444	1225	30	1185	475	6602	10
1 ...........A........ 20	TGAGGTAGTAGATTGTATAG	5p	1	3	7	432	367	763	948	855	105	1849	845	6174	10
1 ........G.............. 23	TGAGGTAGGAGGTTGTATAGTTT	5p	1	114	18	1277	91	906	1396	710	34	775	277	5598	10
1 ...........T.......... 22	TGAGGTAGTAGTTTGTATAGTT	5p	1	18	49	541	127	925	727	616	186	1625	483	5297	10
1 ........G............ 21	TGAGGTAGGAGGTTGTATAGT	5p	1	65	18	1000	145	862	1215	688	29	817	287	5126	10
1 ......................G 22	TGAGGTAGTAGGTTGTATAGTTG	5p	1	10	3	520	129	692	1201	827	46	941	527	4896	10
1 ............A......... 22	TGAGGTAGTAGGATGTATAGTT	5p	1	32	41	985	9	1353	1199	890	19	321	36	4885	10
1 .....................A 21	GAGGTAGTAGGTTGTATAGTTA	5p	1	19		445	25	515	451	517	169	591	5	2737	9
2 A..................... 22	AGAGGTAGTAGGTTGTATAGTT	5p	1	18	35	348	70	297	254	219	41	931	130	2343	10
1 ...............C...... 22	TGAGGTAGTAGGTTGCATAGTT	5p	1	5	63	592	30	382	458	397	11	279	73	2290	10
1 ..................C... 22	TGAGGTAGTAGGTTGTATCGTT	5p	1	3	24	326	80	236	280	225	6	323	753	2256	10
1 ...................T.. 22	TGAGGTAGTAGGTTGTATATTT	5p	1	12	23	359	84	469	359	323	41	374	184	2228	10
1 ......................C 22	TGAGGTAGTAGGTTGTATAGTTC	5p	1	12	4	257	91	307	570	290	16	428	236	2211	10
1 .........A.......... 20	AGGTAGTAGATTGTATAGTT	5p	1	8	4	374	13	392	283	281	172	650		2177	9
1 ..........A......... 20	GAGGTAGTAGATTGTATAGT	5p	1	4	3	261	20	325	287	308	225	650	6	2089	10
1 ................G... 20	AGGTAGTAGGTTGTATGGTT	5p	1	26		353	33	364	268	313	168	561		2086	8
1 ..................T... 22	TGAGGTAGTAGGTTGTATTGTT	5p	1	52	35	431	135	352	293	334	54	259	98	2043	10
1 ............C......... 22	TGAGGTAGTAGGCTGTATAGTT	5p	1	5	10	327	18	328	458	252	5	414	78	1895	10
1 ..G................... 22	TGGGGTAGTAGGTTGTATAGTT	5p	1	6	4	170	16	190	232	157	7	1014	85	1881	10
1 .......... ........... 21	TGAGGTAGTAGTTGTATAGTT	5p	1	8		164	44	441	205	341	24	397	189	1813	9
1 .................G.. 20	GAGGTAGTAGGTTGTATGGT	5p	1	14		241	63	308	226	346	127	467	8	1800	9
2 C..................... 22	CGAGGTAGTAGGTTGTATAGTT	5p	1	25	11	272	97	199	259	213	70	488	142	1776	10
1 ................C..... 22	TGAGGTAGTAGGTTGTCTAGTT	5p	1	4	10	210	27	234	243	194	11	503	289	1725	10
2 T.................... 21	TAGGTAGTAGGTTGTATAGTT	5p	1			7		27	20	22		51	1574	1701	6
1 ............ ......... 21	TGAGGTAGTAGGTGTATAGTT	5p	1	5	3	188	24	374	151	263	27	304	199	1538	10
1 ......C............... 22	TGAGGTCGTAGGTTGTATAGTT	5p	1			78	11	39	45	32	3	806	495	1509	8
1 .....G................ 22	TGAGGGAGTAGGTTGTATAGTT	5p	1	48	45	303	23	194	298	245	37	274	28	1495	10
2 C...................... 23	CTGAGGTAGTAGGTTGTATAGTT	5p	1	19	5	215	21	236	325	250	43	217	62	1393	10
1 ...........C.......... 22	TGAGGTAGTAGCTTGTATAGTT	5p	1	3	7	79	15	100	89	49	5	668	373	1388	10
1 .......G............. 21	GAGGTAGGAGGTTGTATAGTT	5p	1	50	8	354	18	228	217	170	70	230	3	1348	10
1 .....................G 21	TGAGGTAGTAGGTTGTATAGTG	5p	1	16	35	360	220	168	282	90		118	48	1337	9
1 .................G.... 22	GAGGTAGTAGGTTGTATGGTTT	5p	1	17		235	22	191	178	230	103	352		1328	8
1 .................G.... 22	TGAGGTAGTAGGTTGTAGAGTT	5p	1	35	41	480	45	199	364	85	4	58	7	1318	10
1 ..........A........... 22	GAGGTAGTAGATTGTATAGTTT	5p	1		3	170	10	191	183	160	126	386		1229	8
1 ........A............. 22	TGAGGTAGAAGGTTGTATAGTT	5p	1	14	52	91		135	158	302	12	346	68	1178	9
1 ............G......... 22	TGAGGTAGTAGGGTGTATAGTT	5p	1	12	13	291	24	146	263	128	5	214	44	1140	10
1 ...........A...... 18	TGAGGTAGTAGATTGTAT	5p	1			87	27	134	148	181	22	338	154	1091	8
1 .....C................ 22	TGAGGCAGTAGGTTGTATAGTT	5p	1	15	39	124	21	164	182	155	8	295	72	1075	10
1 ................G...... 23	TGAGGTAGTAGGTTGTGTAGTTT	5p	1		8	149	44	149	268	297	8	114	23	1060	9
1 ....................A 20	TGAGGTAGTAGGTTGTATAGA	5p	1		4	37	423	100	163	151	3	115	63	1059	9
1 ...................A 19	TGAGGTAGTAGGTTGTATAA	5p	1			47	422	65	115	121	4	192	79	1045	8
1 ..................G..... 24	TGAGGTAGTAGGTTGTATGGTTTT	5p	1	9	3	200	16	136	201	133	10	210	121	1039	10
1 ......G............... 22	TGAGGTGGTAGGTTGTATAGTT	5p	1			79	10	99	126	69	10	528	73	994	8
2 G..................... 22	GGAGGTAGTAGGTTGTATAGTT	5p	1	6	15	167	7	103	78	65	6	299	240	986	10
1 ........C............. 22	TGAGGTAGCAGGTTGTATAGTT	5p	1	3	10	121	19	112	154	82		373	105	979	9
1 .....................C 21	TGAGGTAGTAGGTTGTATAGTC	5p	1		7	141	274	116	138	102	6	131	53	968	9
1 ..C................... 22	TGCGGTAGTAGGTTGTATAGTT	5p	1		8	69	9	59	63	51	3	327	302	891	9
2 G...................... 23	GTGAGGTAGTAGGTTGTATAGTT	5p	1	30	4	164	17	195	160	190	35	94		889	9
1 ..........T........... 22	TGAGGTAGTATGTTGTATAGTT	5p	1	3		118	14	147	138	123	5	168	98	814	9
1 .........C............ 22	TGAGGTAGTCGGTTGTATAGTT	5p	1	4	5	83	11	74	55	46	8	226	274	786	10
1 ...........A....... 19	TGAGGTAGTAGATTGTATA	5p	1			62	25	82	91	85	10	305	106	766	8
1 ........G........... 20	TGAGGTAGGAGGTTGTATAG	5p	1	4		90	74	92	162	111	9	159	50	751	9
1 ..............T....... 22	TGAGGTAGTAGGTTTTATAGTT	5p	1	23	17	140	19	119	90	126	11	148	53	746	10
2 G..................... 22	GTGAGGTAGTAGGTTGTATAGT	5p	1	8		106	17	149	137	175	32	92		716	8
1 ................G.... 21	TGAGGTAGTAGGTTGTGTAGT	5p	1		5	69	166	74	110	145	6	103	11	689	9
1 .............C........ 22	TGAGGTAGTAGGTCGTATAGTT	5p	1		3	94	12	120	172	92	3	137	48	681	9
1 ...T.................. 22	TGATGTAGTAGGTTGTATAGTT	5p	1			85	10	122	90	107	5	149	103	671	8
1 ................N..... 22	TGAGGTAGTAGGTTGTNTAGTT	5p	1		4	113		170	325	58				670	5
1 .......T.............. 22	TGAGGTATTAGGTTGTATAGTT	5p	1			81	13	111	105	86	6	174	65	641	8
1 .................C... 21	TGAGGTAGTAGGTTGTACAGT	5p	1			72	143	79	91	132	3	90	18	628	8
1 ..........A........... 22	TGAGGTAGTAAGTTGTATAGTT	5p	1		4	50	9	112	102	131	4	111	48	571	9
1 .........G............ 22	TGAGGTAGTGGGTTGTATAGTT	5p	1		3	79	10	74	125	63		159	51	564	8
1 ...............A...... 22	TGAGGTAGTAGGTTGAATAGTT	5p	1	6	12	115		105	141	137		31	14	561	8
1 ..............A....... 22	TGAGGTAGTAGGTTATATAGTT	5p	1	5	6	91	5	110	115	92		100	35	559	9
1 ....T................. 22	TGAGTTAGTAGGTTGTATAGTT	5p	1	13		49	4	89	94	91	4	109	72	525	9
1 ...............G..... 21	TGAGGTAGTAGGTTGGATAGT	5p	1	6	7	159	7	101	176	36		20	4	516	9
1 .....A................ 22	TGAGGAAGTAGGTTGTATAGTT	5p	1	26	37	65	3	67	62	125	7	91	26	509	10
1 ................T..... 22	TGAGGTAGTAGGTTGTTTAGTT	5p	1	7	6	80	46	73	96	64	14	91	26	503	10
1 ...............G....... 23	TGAGGTAGTAGGTTGGATAGTTT	5p	1	4	13	174		77	153	38		25	3	487	8
1 ...........A..... 17	TGAGGTAGTAGATTGTA	5p	1			29	46	45	45	60	9	179	66	479	8
1 ..............C...... 21	GAGGTAGTAGGTTGCATAGTT	5p	1	4		121	7	78	76	91	7	89	3	476	9
1 ..................G 18	TGAGGTAGTAGGTTGTATG	5p	1			27	89	37	55	59	3	84	47	401	8
1 .......................A 23	TGAGGTAGTAGGTTGTATAGTTTA	5p	1			61	19	70	70	63	9	72	36	400	8
1 ..............G...... 21	GAGGTAGTAGGTTGGATAGTT	5p	1	9		115		61	69	51	27	50		382	7
1 ............A........ 21	TGAGGTAGTAGGATGTATAGT	5p	1		5	60	3	105	107	63		28	3	374	8
1 ...................A.. 22	TGAGGTAGTAGGTTGTATAATT	5p	1			44	108	55	50	62	3	29	21	372	8
1 ...........T......... 21	TGAGGTAGTAGTTTGTATAGT	5p	1			24	60	66	42	30		98	48	368	7
1 ..............C....... 22	TGAGGTAGTAGGTTCTATAGTT	5p	1		9	45	10	74	64	59	3	73	29	366	9
1 ....G................ 21	GAGGGAGTAGGTTGTATAGTT	5p	1	13	4	103		56	49	22	11	93		351	8
1 .................C..... 23	TGAGGTAGTAGGTTGTACAGTTT	5p	1		6	71		54	87	87		38	3	346	7
1 .................A.... 22	TGAGGTAGTAGGTTGTAAAGTT	5p	1		10	50	13	69	90	67		25	12	336	8
1 ...................T 19	TGAGGTAGTAGGTTGTATAT	5p	1			14	206	25	18	25		34	8	330	7
1 ....................G 20	TGAGGTAGTAGGTTGTATAGG	5p	1	3	3	51	79	43	62	53		22	13	329	9
1 ..........C........... 22	TGAGGTAGTACGTTGTATAGTT	5p	1	4	3	31	4	70	42	34	4	102	34	328	10
1 ...................C.. 22	TGAGGTAGTAGGTTGTATACTT	5p	1			52	55	52	53	62		32	16	322	7
1 .............A........ 22	TGAGGTAGTAGGTAGTATAGTT	5p	1	3	13	46		61	63	71	4	34	19	314	9
1 ............A.......... 23	TGAGGTAGTAGGATGTATAGTTT	5p	1			52		100	88	47		23		310	5
1 ...A.................. 22	TGAAGTAGTAGGTTGTATAGTT	5p	1			41	5	62	58	40	4	55	37	302	8
1 ....................C 20	TGAGGTAGTAGGTTGTATAGC	5p	1		3	20	139	22	40	29		28	11	292	8
1 .......A.............. 22	TGAGGTAATAGGTTGTATAGTT	5p	1			40	3	47	66	28		78	22	284	7
1 ....................G.. 23	TGAGGTAGTAGGTTGTATAGGTT	5p	1		10	64	12	48	62	47	4	21		268	8
1 .......C.............. 22	TGAGGTACTAGGTTGTATAGTT	5p	1			21	10	55	50	43		68	19	266	7
2 C................... 20	CGGTAGTAGGTTGTATAGTT	5p	1										262	262	1
1 ....................A 20	AGGTAGTAGGTTGTATAGTTA	5p	1			48		44	33	39	18	70		252	6
1 ..................C.. 21	TGAGGTAGTAGGTTGTATCGT	5p	1			17	67	9	29	26		32	71	251	7
1 ...........A............ 24	TGAGGTAGTAGATTGTATAGTTTT	5p	1			41		39	38	30	8	59	30	245	7
1 ....A................. 22	TGAGATAGTAGGTTGTATAGTT	5p	1		4	32		40	46	39		65	17	243	7
1 ..........A........ 19	GAGGTAGTAGATTGTATAG	5p	1			22	9	33	20	38	26	86		234	7
1 .............G........ 22	TGAGGTAGTAGGTGGTATAGTT	5p	1	5	11	41	4	35	65	21		37	14	233	9
1 ................G... 20	TGAGGTAGTAGGTTGTGTAG	5p	1			7	141	11	17	28		13	9	226	7
1 ..................T 18	TGAGGTAGTAGGTTGTATT	5p	1			11	55	37	24	31		43	24	225	7
1 ..................T.. 21	TGAGGTAGTAGGTTGTATTGT	5p	1			19	88	27	21	36	4	22	5	222	8
1 .........T............ 22	TGAGGTAGTTGGTTGTATAGTT	5p	1			26		32	43	32		69	16	218	6
2 A.................... 21	AGAGGTAGTAGGTTGTATAGT	5p	1			24	14	19	21	22	5	91	16	212	8
1 ......G............. 20	AGGTAGGAGGTTGTATAGTT	5p	1	4		51		35	37	21	14	41		203	7
1 ...........G......... 21	GAGGTAGTAGGGTGTATAGTT	5p	1		3	34		15	24	40	32	52		200	7
1 ..T................... 22	TGTGGTAGTAGGTTGTATAGTT	5p	1			21		28	31	25		74	18	197	6
1 ...........T........... 23	TGAGGTAGTAGTTTGTATAGTTT	5p	1			20		33	31	26	4	53	27	194	7
1 ...............C.... 20	TGAGGTAGTAGGTTGCATAG	5p	1				177			10		6		193	3
1 ................C.... 21	TGAGGTAGTAGGTTGTCTAGT	5p	1			10	40	17	16	29		52	24	188	7
1 ....................A.. 23	TGAGGTAGTAGGTTGTATAGATT	5p	1		3	22	19	38	43	46		10		181	7
1 .......G.............. 22	GAGGTAGGAGGTTGTATAGTTT	5p	1	11		43		36	27	27	6	28		178	7
1 ....C................. 22	TGAGCTAGTAGGTTGTATAGTT	5p	1			21	3	36	30	25		44	18	177	7
1 ............C........ 21	TGAGGTAGTAGGCTGTATAGT	5p	1			16		23	45	29		53	9	175	6
1 ........G............... 24	TGAGGTAGGAGGTTGTATAGTTTT	5p	1	4		44	3	27	41	18	3	22	13	175	9
1 .................C.. 20	TGAGGTAGTAGGTTGTACAG	5p	1			8	136	5	8	6		11		174	6
1 ................G.. 19	AGGTAGTAGGTTGTATGGT	5p	1			25	7	27	21	27	13	50		170	7
2 C.................... 21	CGAGGTAGTAGGTTGTATAGT	5p	1			18	12	24	22	25	6	44	13	164	8
1 ...C.................. 22	TGACGTAGTAGGTTGTATAGTT	5p	1			15	5	34	26	28		46	7	161	7
2 T................... 20	TAGGTAGTAGGTTGTATAGT	5p	1									6	154	160	2
1 ..........C.......... 21	GAGGTAGTAGCTTGTATAGTT	5p	1			6		11	4	9	17	107	5	159	7
2 A...................... 23	AGAGGTAGTAGGTTGTATAGTTT	5p	1		3	20	6	15	15	21		64	14	158	8
2 T..................... 22	TAGGTAGTAGGTTGTATAGTTT	5p	1						6			4	148	158	3
1 .................G... 21	TGAGGTAGTAGGTTGTAGAGT	5p	1	3		24	37	26	43	11		10	3	157	8
1 .................A 17	TGAGGTAGTAGGTTGTAA	5p	1			4	100	7	5	10		18	10	154	7
2 C..................... 22	CTGAGGTAGTAGGTTGTATAGT	5p	1			18	6	27	43	31		19	6	150	7
1 .....G............... 21	TGAGGGAGTAGGTTGTATAGT	5p	1			21	6	13	31	33	8	32	5	149	8
1 ......C.............. 21	TGAGGTCGTAGGTTGTATAGT	5p	1			6		3	6			58	74	147	5
1 ....................A 20	GAGGTAGTAGGTTGTATAGTA	5p	1		3	19	10	29	23	30	4	27		145	8
1 ......T............... 22	TGAGGTTGTAGGTTGTATAGTT	5p	1			14		24	34	15	3	48	7	145	7
1 .......G............ 20	GAGGTAGGAGGTTGTATAGT	5p	1			36		22	25	25	10	24		142	6
1 ................G.... 21	AGGTAGTAGGTTGTATGGTTT	5p	1			29		22	10	27	13	41		142	6
1 ....................C.. 23	TGAGGTAGTAGGTTGTATAGCTT	5p	1		4	22	37	18	28	16		11	6	142	8
1 ...................C 19	TGAGGTAGTAGGTTGTATAC	5p	1				134					3	5	142	3
2 G.................... 21	GTGAGGTAGTAGGTTGTATAG	5p	1	4		17	8	24	18	31	8	29		139	8
1 ..................C.... 23	TGAGGTAGTAGGTTGTATCGTTT	5p	1			14	3	7	20	8		25	61	138	7
2 T..................... 22	TTGAGGTAGTAGGTTGTATAGT	5p	1			10		20	18	17		17	54	136	6
1 .......... .......... 20	TGAGGTAGTAGTTGTATAGT	5p	1			10	4	27	11	23		33	28	136	7
1 .................A.. 20	TGAGGTAGTAGGTTGTAAAG	5p	1				136							136	1
2 C...................... 23	CGAGGTAGTAGGTTGTATAGTTT	5p	1			12	7	14	28	15	8	39	12	135	8
1 ...............C....... 23	TGAGGTAGTAGGTTGCATAGTTT	5p	1			34		20	29	27		17	8	135	6
1 ............C.......... 23	TGAGGTAGTAGGCTGTATAGTTT	5p	1			20	4	23	38	16		29	4	134	7
1 .................A... 21	TGAGGTAGTAGGTTGTAAAGT	5p	1			6	83	8	16	13		4	3	133	7
1 ..G.................. 21	TGGGGTAGTAGGTTGTATAGT	5p	1			9		10	25	10		63	8	125	6
1 ........... ........... 22	TGAGGTAGTAGTTGTATAGTTT	5p	1			11		31	20	14		33	15	124	6
1 .......................C 23	TGAGGTAGTAGGTTGTATAGTTTC	5p	1			15	10	16	25	19		26	12	123	7
1 ......C................ 23	TGAGGTCGTAGGTTGTATAGTTT	5p	1			3		5	8	5		66	35	122	6
1 .....................G 21	GAGGTAGTAGGTTGTATAGTTG	5p	1			17		14	28	17	7	39		122	6
1 ..G.................... 23	TGGGGTAGTAGGTTGTATAGTTT	5p	1			17		9	16	10		57	8	117	6
1 ...........C......... 21	TGAGGTAGTAGCTTGTATAGT	5p	1			8		5	5	3		67	28	116	6
1 .....C............... 21	TGAGGCAGTAGGTTGTATAGT	5p	1		4	9		19	12	24	4	36	7	115	8
1 ..........T.......... 21	GAGGTAGTAGTTTGTATAGTT	5p	1			13		19	14	13	26	29		114	6
1 ............ .......... 22	TGAGGTAGTAGGTGTATAGTTT	5p	1			14		25	14	18		21	17	109	6
1 .........C........... 21	TGAGGTAGTCGGTTGTATAGT	5p	1			5	3	10	7	15		28	40	108	7
1 ..................T.... 23	TGAGGTAGTAGGTTGTATTGTTT	5p	1			22	6	18	22	13	3	16	5	105	8
2 G.................... 21	GGAGGTAGTAGGTTGTATAGT	5p	1			6		13	5	7		34	40	105	6
1 ...............C..... 21	TGAGGTAGTAGGTTGCATAGT	5p	1			20		15	17	24		20	7	103	6
1 ...................T... 23	TGAGGTAGTAGGTTGTATATTTT	5p	1			11	4	19	20	19	4	21	5	103	8
1 .........A........... 21	AGGTAGTAGATTGTATAGTTT	5p	1			14		11	10	9	12	45		101	6
1 ........C............ 21	TGAGGTAGCAGGTTGTATAGT	5p	1			10		8	17	9		42	14	100	6
1 ................G.. 19	TGAGGTAGTAGGTTGTGTA	5p	1				28	7	10	12		31	11	99	6
1 ................C...... 23	TGAGGTAGTAGGTTGTCTAGTTT	5p	1			15		7	16	10		28	22	98	6
1 .................T... 21	GAGGTAGTAGGTTGTATTGTT	5p	1	6		12	5	16	11	14	24	8		96	8
1 .....G................. 23	TGAGGGAGTAGGTTGTATAGTTT	5p	1			19		8	23	20		25		95	5
1 ...........T........ 20	TGAGGTAGTAGTTTGTATAG	5p	1				67	7	4	7		5	3	93	6
1 .....C................. 23	TGAGGCAGTAGGTTGTATAGTTT	5p	1		4	5		18	19	10		27	6	89	7
2 C....................... 24	CTGAGGTAGTAGGTTGTATAGTTT	5p	1			13		11	31	14		14	5	88	6
2 T...................... 23	TTGAGGTAGTAGGTTGTATAGTT	5p	1			7		6	11	8		7	48	87	6
1 ............G........ 21	TGAGGTAGTAGGGTGTATAGT	5p	1		3	16		15	17	13		16	4	84	7
1 .....................C 21	GAGGTAGTAGGTTGTATAGTTC	5p	1			11	5	10	20	7	4	24		81	7
1 ...............G.... 20	TGAGGTAGTAGGTTGGATAG	5p	1			17	33	11	13	3		4		81	6
1 ................C.... 21	GAGGTAGTAGGTTGTACAGTT	5p	1			13		14	13	15	5	17		77	6
1 ....C................ 21	GAGGCAGTAGGTTGTATAGTT	5p	1		4	5		8	7	10		42		76	6
1 ........C............ 21	GAGGTAGTCGGTTGTATAGTT	5p	1			3		3		9	9	52		76	5
1 ......G.............. 21	TGAGGTGGTAGGTTGTATAGT	5p	1			4		9	13	5		38	6	75	6
1 ..C.................. 21	TGCGGTAGTAGGTTGTATAGT	5p	1			6	3	3	3	3		28	29	75	7
1 ..........T.......... 21	TGAGGTAGTATGTTGTATAGT	5p	1			3		11	13	12		25	11	75	6
1 ...T................. 21	TGATGTAGTAGGTTGTATAGT	5p	1			5		12	16	9		21	10	73	6
1 ..C.................... 23	TGCGGTAGTAGGTTGTATAGTTT	5p	1			4			7	5		36	21	73	5
1 ..................T.. 21	GAGGTAGTAGGTTGTATATTT	5p	1			6		16	5	9	16	20		72	6
1 ........A............ 21	TGAGGTAGAAGGTTGTATAGT	5p	1			3		9	10	20		23	5	70	6
1 ........A.............. 23	TGAGGTAGAAGGTTGTATAGTTT	5p	1		4	5		7	12	11		23	8	70	7
1 ...T................... 23	TGATGTAGTAGGTTGTATAGTTT	5p	1			10		5	9	19		13	12	68	6
1 .............G...... 20	AGGTAGTAGGTTGGATAGTT	5p	1			24		16	12	8		7		67	5
1 ...........C........... 23	TGAGGTAGTAGCTTGTATAGTTT	5p	1					7	5			32	23	67	4
2 G...................... 23	GGAGGTAGTAGGTTGTATAGTTT	5p	1			12		3	7			15	29	66	5
1 ..........T............ 23	TGAGGTAGTATGTTGTATAGTTT	5p	1			13		9	8	10		13	13	66	6
1 ........C.............. 23	TGAGGTAGCAGGTTGTATAGTTT	5p	1			7		8	9	6		22	11	63	6
1 ...............C... 19	TGAGGTAGTAGGTTGCATA	5p	1				63							63	1
1 .......T............. 21	TGAGGTATTAGGTTGTATAGT	5p	1			4		13	11	13		16	6	63	6
1 ............G.......... 23	TGAGGTAGTAGGGTGTATAGTTT	5p	1			8		10	19	14		11		62	5
1 ..............T...... 21	TGAGGTAGTAGGTTTTATAGT	5p	1			5		8	11	8		23	6	61	6
1 ...............A..... 21	TGAGGTAGTAGGTTGAATAGT	5p	1			10		10	15	26				61	4
1 ........G.......... 19	TGAGGTAGGAGGTTGTATA	5p	1			13		7	9	10		21		60	5
2 N..................... 22	NGAGGTAGTAGGTTGTATAGTT	5p	1									58		58	1
1 ......G................ 23	TGAGGTGGTAGGTTGTATAGTTT	5p	1					7	10	4		29	8	58	5
1 ...............G..... 21	GAGGTAGTAGGTTGTGTAGTT	5p	1	7		11	4	3	11	4	5	13		58	8
1 .................G..... 23	TGAGGTAGTAGGTTGTAGAGTTT	5p	1			16		7	23	4		7		57	5
1 .......................G 23	TGAGGTAGTAGGTTGTATAGTTTG	5p	1				12	8	13	10		9	3	55	6
1 ....A................ 21	GAGGAAGTAGGTTGTATAGTT	5p	1			4			3	9	7	32		55	5
1 .........C............. 23	TGAGGTAGTCGGTTGTATAGTTT	5p	1			6		4	7	6		12	20	55	6
1 ...........T..... 17	TGAGGTAGTAGTTTGTA	5p	1				26		5	3		13	5	52	5
1 .......T............... 23	TGAGGTATTAGGTTGTATAGTTT	5p	1			6		7	16	3		16	4	52	6
1 ..............T........ 23	TGAGGTAGTAGGTTTTATAGTTT	5p	1			7		9	9	10		8	8	51	6
1 ..........A...... 17	GAGGTAGTAGATTGTAT	5p	1			5		5	4	7	7	23		51	6
1 .............C....... 21	TGAGGTAGTAGGTCGTATAGT	5p	1			6		8	8	10		14	4	50	6
1 .....A............... 21	TGAGGAAGTAGGTTGTATAGT	5p	1			4		7	5	12		17	4	49	6
1 .............C......... 23	TGAGGTAGTAGGTCGTATAGTTT	5p	1			4		11	16	6	3	9		49	6
1 .........G........... 21	TGAGGTAGTGGGTTGTATAGT	5p	1			5	3	8	9	5		14	5	49	7
1 ..........A.......... 21	TGAGGTAGTAAGTTGTATAGT	5p	1					5	12	17		9	6	49	5
1 ....T................ 21	TGAGTTAGTAGGTTGTATAGT	5p	1			5	5	8	5	4		12	9	48	7
1 .................G 17	TGAGGTAGTAGGTTGTAG	5p	1			3	22	3				13	7	48	5
1 ....T.................. 23	TGAGTTAGTAGGTTGTATAGTTT	5p	1			3		6	9	13		12	4	47	6
1 ................C... 20	TGAGGTAGTAGGTTGTCTAG	5p	1				35	3				6	3	47	4
1 ..........A....... 18	GAGGTAGTAGATTGTATA	5p	1					6	3	9	7	21		46	5
1 ................T.... 21	TGAGGTAGTAGGTTGTTTAGT	5p	1			4	16	5	5	4	5	7		46	7
1 ...........A......... 21	GAGGTAGTAGGATGTATAGTT	5p	1		3	9		13	8			13		46	5
1 ...........T...... 18	TGAGGTAGTAGTTTGTAT	5p	1				37			3		5		45	3
1 ..............A...... 21	TGAGGTAGTAGGTTATATAGT	5p	1			4	3	9	17	5		3	4	45	7
1 ................N...... 23	TGAGGTAGTAGGTTGTNTAGTTT	5p	1			9		9	22	4				44	4
1 .....A................. 23	TGAGGAAGTAGGTTGTATAGTTT	5p	1			7		11	4	9		10	3	44	6
1 ...........C......... 21	GAGGTAGTAGGCTGTATAGTT	5p	1			9		9	9	3		14		44	5
1 ................N.... 21	TGAGGTAGTAGGTTGTNTAGT	5p	1			6		12	22	4				44	4
1 ............A....... 20	TGAGGTAGTAGGATGTATAG	5p	1			7		10	12	9		4		42	5
1 .......... .......... 20	GAGGTAGTAGTTGTATAGTT	5p	1					18		12	6	5		41	4
1 ..............G..... 20	GAGGTAGTAGGTTGGATAGT	5p	1			3		5	11	6	4	12		41	6
1 ..............A.. 17	TGAGGTAGTAGGTTATA	5p	1				41							41	1
2 T................... 20	TGGTAGTAGGTTGTATAGTT	5p	1			4		6	5	11		10	4	40	6
1 ...............A....... 23	TGAGGTAGTAGGTTGAATAGTTT	5p	1			12		7	7	13				39	4
1 ................T... 20	TGAGGTAGTAGGTTGTTTAG	5p	1				36					3		39	2
1 ........... ......... 20	GAGGTAGTAGGTGTATAGTT	5p	1			6		7	4	6	8	7		38	6
1 ..............C....... 22	GAGGTAGTAGGTTGCATAGTTT	5p	1			6		3	5	7	6	11		38	6
1 .................G.. 20	TGAGGTAGTAGGTTGTAGAG	5p	1			5	15	3	6	4		3		36	6
1 ..............C..... 20	GAGGTAGTAGGTTGCATAGT	5p	1			6		5	3	11		10		35	5
1 ................T...... 23	TGAGGTAGTAGGTTGTTTAGTTT	5p	1			8		4	11	8		4		35	5
1 ........ ............. 21	TGAGGTAGAGGTTGTATAGTT	5p	1					8	6	5		9	6	34	5
1 ...................A... 23	TGAGGTAGTAGGTTGTATAATTT	5p	1				16	3		8		7		34	4
1 ..............G....... 22	GAGGTAGTAGGTTGGATAGTTT	5p	1			12		7		6		9		34	4
1 ..................C 18	TGAGGTAGTAGGTTGTATC	5p	1				33							33	1
1 .................G..... 23	GAGGTAGTAGGTTGTATGGTTTT	5p	1			6		6	3	3	6	8		32	6
1 ........................T 24	TGAGGTAGTAGGTTGTATAGTTTTT	5p	1			13			5	3		8	3	32	5
1 .........G............. 23	TGAGGTAGTGGGTTGTATAGTTT	5p	1			3		6	6	7		10		32	5
1 ..........C.......... 21	TGAGGTAGTACGTTGTATAGT	5p	1					6	7	7		12		32	4
1 ......G.............. 21	AGGTAGGAGGTTGTATAGTTT	5p	1	3		6		4	5		8	6		32	6
1 ..........A............ 23	TGAGGTAGTAAGTTGTATAGTTT	5p	1			5		4	4	11		7		31	5
1 ..............A........ 23	TGAGGTAGTAGGTTATATAGTTT	5p	1			4		8	4	10		5		31	5
1 ....................C 20	GAGGTAGTAGGTTGTATAGTC	5p	1			5		8	7	8		3		31	5
1 ................T... 20	AGGTAGTAGGTTGTATTGTT	5p	1			4		3	3		15	5		30	5
2 A................... 20	AGAGGTAGTAGGTTGTATAG	5p	1			3	3		3	3		15	3	30	6
1 ................G....... 24	TGAGGTAGTAGGTTGTGTAGTTTT	5p	1			3		5	6	13		3		30	5
1 ................T 16	TGAGGTAGTAGGTTGTT	5p	1				8	3		5		13		29	4
2 G....................... 24	GTGAGGTAGTAGGTTGTATAGTTT	5p	1			4		4	9	5	3	3		28	6
1 .............A....... 21	TGAGGTAGTAGGTAGTATAGT	5p	1			5		6	4	5		4	4	28	6
1 .........T........... 21	TGAGGTAGTTGGTTGTATAGT	5p	1			8		3	5	4		8		28	5
1 .......C............. 21	GAGGTAGCAGGTTGTATAGTT	5p	1			3				7	5	13		28	4
1 ....................G 20	GAGGTAGTAGGTTGTATAGTG	5p	1			6	4			7	4	6		27	5
1 ................N.... 21	GAGGTAGTAGGTTGTANAGTT	5p	1			8		6	8		4			26	4
1 ....G................. 22	GAGGGAGTAGGTTGTATAGTTT	5p	1			9		4	4			9		26	4
1 ....G............... 20	GAGGGAGTAGGTTGTATAGT	5p	1			4		3	5			13		25	4
1 .............G....... 21	TGAGGTAGTAGGTGGTATAGT	5p	1			4		3	7	4		7		25	5
1 .............C...... 20	AGGTAGTAGGTTGCATAGTT	5p	1			4		6	8			7		25	4
1 ........G............ 21	GAGGTAGTGGGTTGTATAGTT	5p	1			5		4	4		3	9		25	5
1 ............C........ 21	GAGGTAGTAGGTCGTATAGTT	5p	1			5		3		9		7		24	4
1 ..T.................. 21	GATGTAGTAGGTTGTATAGTT	5p	1	4				4	5	4		7		24	5
1 .......A............. 21	TGAGGTAATAGGTTGTATAGT	5p	1			4		6	4	6			4	24	5
1 .................C... 21	GAGGTAGTAGGTTGTATCGTT	5p	1			3		3	6			12		24	4
2 C.................. 19	CGGTAGTAGGTTGTATAGT	5p	1										24	24	1
2 C................... 20	CGAGGTAGTAGGTTGTATAG	5p	1				10			3	3	7		23	4
1 ..................A 18	GAGGTAGTAGGTTGTATAA	5p	1				12			5		6		23	3
1 .......C............. 21	TGAGGTACTAGGTTGTATAGT	5p	1			3		4	4			9	3	23	5
1 ...................C... 23	TGAGGTAGTAGGTTGTATACTTT	5p	1				15					8		23	2
1 ...........G.......... 22	GAGGTAGTAGGGTGTATAGTTT	5p	1						4	5	4	10		23	4
1 ...............C.. 18	TGAGGTAGTAGGTTGCAT	5p	1				22							22	1
2 T.................. 19	TAGGTAGTAGGTTGTATAG	5p	1										22	22	1
1 .................A..... 23	TGAGGTAGTAGGTTGTAAAGTTT	5p	1			7		3	5	3		4		22	5
1 ......... ............ 21	TGAGGTAGTGGTTGTATAGTT	5p	1				3	4		4		11		22	4
2 C.................... 21	CGGTAGTAGGTTGTATAGTTT	5p	1										21	21	1
1 ..G................. 20	TGGGGTAGTAGGTTGTATAG	5p	1						4	6		10		20	3
2 A.................... 21	AAGGTAGTAGGTTGTATAGTT	5p	1						7			8	4	19	3
1 ...A................... 23	TGAAGTAGTAGGTTGTATAGTTT	5p	1			3			5	5		6		19	4
1 ...........T....... 19	TGAGGTAGTAGTTTGTATA	5p	1				19							19	1
1 ......C............. 20	TGAGGTCGTAGGTTGTATAG	5p	1									13	5	18	2
1 .......C............... 23	TGAGGTACTAGGTTGTATAGTTT	5p	1			3		3	5	3		4		18	5
1 ..............C...... 21	TGAGGTAGTAGGTTCTATAGT	5p	1						8	7		3		18	3
1 .........T............. 23	TGAGGTAGTTGGTTGTATAGTTT	5p	1					3	4	3		5	3	18	5
1 ...................A 19	GAGGTAGTAGGTTGTATAGA	5p	1				4		3	3		8		18	4
1 ............C.... 17	TGAGGTAGTAGGCTGTA	5p	1				13					5		18	2
1 .......G........... 19	GAGGTAGGAGGTTGTATAG	5p	1			3	4			7		3		17	4
1 ..............C........ 23	TGAGGTAGTAGGTTCTATAGTTT	5p	1			3		3		5		6		17	4
1 ...............G... 19	TGAGGTAGTAGGTTGGATA	5p	1			5	7		5					17	3
1 .....C.............. 20	TGAGGCAGTAGGTTGTATAG	5p	1					3	5			9		17	3
1 ...........C........ 20	TGAGGTAGTAGCTTGTATAG	5p	1									11	6	17	2
2 T.................... 21	TTGAGGTAGTAGGTTGTATAG	5p	1						4	3		3	7	17	4
1 .......... ......... 19	TGAGGTAGTAGTTGTATAG	5p	1						4	5		4	4	17	4
1 ..........A....... 18	TGAGGTAGTAAGTTGTAT	5p	1				5			4		8		17	3
2 C................ 17	CGAGGTAGTAGGTTGTA	5p	1				10					7		17	2
1 .........T........... 21	GAGGTAGTATGTTGTATAGTT	5p	1			4		4			3	5		16	4
1 ....A.................. 23	TGAGATAGTAGGTTGTATAGTTT	5p	1			3		4				6	3	16	4
1 ............C....... 20	TGAGGTAGTAGGCTGTATAG	5p	1					3	6			7		16	3
1 .............. ........ 22	TGAGGTAGTAGGTTTATAGTTT	5p	1					10	3				3	16	3
1 .............A......... 23	TGAGGTAGTAGGTAGTATAGTTT	5p	1						8	3		4		15	3
1 ...............C..... 21	GAGGTAGTAGGTTGTCTAGTT	5p	1								4	11		15	2
1 ...............A... 19	TGAGGTAGTAGGTTGAATA	5p	1				15							15	1
1 ...C................. 21	TGACGTAGTAGGTTGTATAGT	5p	1						4			7	4	15	3
1 ..........G......... 20	AGGTAGTAGGGTGTATAGTT	5p	1			4				6		5		15	3
2 G................... 20	GGAGGTAGTAGGTTGTATAG	5p	1					4				6	4	14	3
1 ...................G.. 22	GAGGTAGTAGGTTGTATAGGTT	5p	1			6			5	3				14	3
1 ...............T..... 21	GAGGTAGTAGGTTGTTTAGTT	5p	1			3					6	5		14	3
1 .............C... 17	TGAGGTAGTAGGTCGTA	5p	1				13							13	1
1 ....C................ 21	TGAGCTAGTAGGTTGTATAGT	5p	1						3	3		7		13	3
1 .....G............... 21	GAGGTGGTAGGTTGTATAGTT	5p	1						4	4		5		13	3
1 ...................G 19	GAGGTAGTAGGTTGTATAGG	5p	1						5	5		3		13	3
1 ....................G 20	AGGTAGTAGGTTGTATAGTTG	5p	1				3	4	3			3		13	4
1 ..T.................. 21	TGTGGTAGTAGGTTGTATAGT	5p	1						3			6	4	13	3
1 ..............A...... 21	GAGGTAGTAGGTTGAATAGTT	5p	1					5	4	4				13	3
1 ...................G... 23	ATGAGGTAGTAGGTTGTATGGTT	5p	1						6	6				12	2
1 .....C............... 21	GAGGTCGTAGGTTGTATAGTT	5p	1									12		12	1
1 ...A................. 21	TGAAGTAGTAGGTTGTATAGT	5p	1					3				9		12	2
2 C.................... 21	CAGGTAGTAGGTTGTATAGTT	5p	1						3	5			4	12	3
1 ......T.............. 21	GAGGTATTAGGTTGTATAGTT	5p	1					4		4		4		12	3
1 ..C................. 20	TGCGGTAGTAGGTTGTATAG	5p	1									5	7	12	2
1 ......T.............. 21	TGAGGTTGTAGGTTGTATAGT	5p	1			4				3		5		12	3
1 ......C.......... 17	TGAGGTCGTAGGTTGTA	5p	1									5	7	12	2
1 ...............A.. 18	TGAGGTAGTAGGTTGAAT	5p	1				12							12	1
1 .......A............... 23	TGAGGTAATAGGTTGTATAGTTT	5p	1					5		3		3		11	3
1 ..............C.. 17	TGAGGTAGTAGGTTCTA	5p	1				11							11	1
1 ...................A 19	AGGTAGTAGGTTGTATAGTA	5p	1						4			7		11	2
1 .....T............... 21	GAGGTTGTAGGTTGTATAGTT	5p	1									11		11	1
1 ....A................ 21	TGAGATAGTAGGTTGTATAGT	5p	1					3				4	4	11	3
1 ..................C.. 21	GAGGTAGTAGGTTGTATACTT	5p	1					3		4		4		11	3
1 ............G....... 20	TGAGGTAGTAGGGTGTATAG	5p	1					3				8		11	2
1 ....C.................. 23	TGAGCTAGTAGGTTGTATAGTTT	5p	1					3	4			3		10	3
1 .....G.............. 20	TGAGGGAGTAGGTTGTATAG	5p	1						4			6		10	2
1 .........C.......... 20	AGGTAGTAGCTTGTATAGTT	5p	1								5	5		10	2
1 ......G............ 19	AGGTAGGAGGTTGTATAGT	5p	1			4		6						10	2
1 ................G.... 21	GAGGTAGTAGGTTGTAGAGTT	5p	1			4				3		3		10	3
1 ...G................ 20	AGGGAGTAGGTTGTATAGTT	5p	1						4			6		10	2
1 ......................A 22	GAGGTAGTAGGTTGTATAGTTTA	5p	1							3		7		10	2
1 ..........A............ 23	GAGGTAGTAGATTGTATAGTTTT	5p	1			3						7		10	2
1 ..T.................... 23	TGTGGTAGTAGGTTGTATAGTTT	5p	1			3		3	4					10	3
1 ............G.... 17	TGAGGTAGTAGGGTGTA	5p	1				6					3		9	2
1 ................C... 20	AGGTAGTAGGTTGTATCGTT	5p	1									9		9	1
1 ......C.............. 21	GAGGTACTAGGTTGTATAGTT	5p	1					3		3		3		9	3
1 ..C.............. 17	TGCGGTAGTAGGTTGTA	5p	1									5	4	9	2
1 ................C 16	TGAGGTAGTAGGTTGTC	5p	1				9							9	1
1 .............A...... 20	AGGTAGTAGGTTGAATAGTT	5p	1			4		5						9	2
1 ..........C............ 23	TGAGGTAGTACGTTGTATAGTTT	5p	1						4			5		9	2
1 ............A.......... 23	ATGAGGTAGTAGATTGTATAGTT	5p	1						3	3		3		9	3
1 ......T................ 23	TGAGGTTGTAGGTTGTATAGTTT	5p	1					3	3			3		9	3
1 ..................A.. 21	GAGGTAGTAGGTTGTATAATT	5p	1			3				6				9	2
1 ................A.... 21	GAGGTAGTAGGTTGTAAAGTT	5p	1					3	3			3		9	3
1 ...............G... 19	GGTAGTAGGTTGTATGGTT	5p	1							5		4		9	2
2 C.................... 21	CTGAGGTAGTAGGTTGTATAG	5p	1					4		5				9	2
1 .........T.......... 20	AGGTAGTAGTTTGTATAGTT	5p	1					3				5		8	2
1 ..........C......... 20	GAGGTAGTAGCTTGTATAGT	5p	1									8		8	1
1 ................T.. 19	TGAGGTAGTAGGTTGTTTA	5p	1				8							8	1
1 ...T................. 21	GAGTTAGTAGGTTGTATAGTT	5p	1					4				4		8	2
2 T.................. 19	TGTAGTAGGTTGTATAGTT	5p	1									8		8	1
1 ......G............. 20	TGAGGTGGTAGGTTGTATAG	5p	1									8		8	1
1 ...............G.... 20	GAGGTAGTAGGTTGTGTAGT	5p	1				5					3		8	2
1 ........T............ 21	GAGGTAGTTGGTTGTATAGTT	5p	1						3			5		8	2
1 ....C............... 20	AGGTCGTAGGTTGTATAGTT	5p	1									7		7	1
1 ..............A.... 19	TGAGGTAGTAGGTTATATA	5p	1				7							7	1
1 .......A............. 21	GAGGTAGAAGGTTGTATAGTT	5p	1							4		3		7	2
1 .........C.......... 20	TGAGGTAGTCGGTTGTATAG	5p	1									3	4	7	2
1 ........C........... 20	TGAGGTAGCAGGTTGTATAG	5p	1									3	4	7	2
1 ...................C 19	GAGGTAGTAGGTTGTATAGC	5p	1				4			3				7	2
2 N...................... 23	NGAGGTAGTAGGTTGTATAGTTT	5p	1									7		7	1
1 ...........G........ 20	GAGGTAGTAGGGTGTATAGT	5p	1							4	3			7	2
2 N.................... 21	NGAGGTAGTAGGTTGTATAGT	5p	1									7		7	1
1 ...............A.... 20	TGAGGTAGTAGGTTGAATAG	5p	1				7							7	1
1 ..............T..... 20	TGAGGTAGTAGGTTTTATAG	5p	1									6		6	1
1 ..................T 18	GAGGTAGTAGGTTGTATAT	5p	1				6							6	1
1 ..............C..... 20	TGAGGTAGTAGGTTCTATAG	5p	1									6		6	1
1 ...............G.. 18	TGAGGTAGTAGGTTGGAT	5p	1			3						3		6	2
1 .................T 17	GAGGTAGTAGGTTGTATT	5p	1				3		3					6	2
1 ............A........ 21	GAGGTAGTAGGTAGTATAGTT	5p	1					6						6	1
1 ...................G.. 22	ATGAGGTAGTAGGTTGTATGGT	5p	1					3				3		6	2
1 ........C........... 20	GAGGTAGTCGGTTGTATAGT	5p	1									6		6	1
1 .................G 17	GAGGTAGTAGGTTGTATG	5p	1					3				3		6	2
1 .......... ........... 21	GAGGTAGTAGTTGTATAGTTT	5p	1								3	3		6	2
1 ..A.................. 21	GAAGTAGTAGGTTGTATAGTT	5p	1									6		6	1
1 .............C....... 21	GAGGTAGTAGGTTCTATAGTT	5p	1							5				5	1
1 ..............T.. 17	TGAGGTAGTAGGTTTTA	5p	1				5							5	1
1 .......T............ 20	TGAGGTATTAGGTTGTATAG	5p	1									5		5	1
1 .......N.............. 22	TGAGGTANTAGGTTGTATAGTT	5p	1									5		5	1
1 ....A............... 20	TGAGATAGTAGGTTGTATAG	5p	1									5		5	1
1 ...A................. 21	GAGATAGTAGGTTGTATAGTT	5p	1					5						5	1
1 .............T....... 21	GAGGTAGTAGGTTTTATAGTT	5p	1									5		5	1
1 ...............G........ 24	TGAGGTAGTAGGTTGGATAGTTTT	5p	1						5					5	1
1 ............A.... 17	TGAGGTAGTAGGATGTA	5p	1									4		4	1
1 ...............G.... 20	AGGTAGTAGGTTGTAGAGTT	5p	1			4								4	1
1 ....................N. 22	TGAGGTAGTAGGTTGTATAGNT	5p	1				4							4	1
1 ..............G..... 20	AGGTAGTAGGTTGTGTAGTT	5p	1							4				4	1
1 ......................C 22	GAGGTAGTAGGTTGTATAGTTTC	5p	1									4		4	1
2 T................. 18	TAGGTAGTAGGTTGTATA	5p	1										4	4	1
1 ...........C..... 17	TGAGGTAGTAGCTTGTA	5p	1									4		4	1
2 T...................... 23	TAGGTAGTAGGTTGTATAGTTTT	5p	1										4	4	1
1 .............A....... 21	GAGGTAGTAGGTTATATAGTT	5p	1					4						4	1
1 .............C...... 20	TGAGGTAGTAGGTCGTATAG	5p	1									4		4	1
1 .....A.............. 20	TGAGGAAGTAGGTTGTATAG	5p	1									4		4	1
1 ..............C... 18	TGAGGTAGTAGGTTCTAT	5p	1				4							4	1
1 ........C............. 22	GAGGTAGTCGGTTGTATAGTTT	5p	1									4		4	1
2 C................. 18	CTGAGGTAGTAGGTTGTA	5p	1									4		4	1
2 C................. 18	CGAGGTAGTAGGTTGTAT	5p	1									4		4	1
1 .................N.... 22	TGAGGTAGTAGGTTGTANAGTT	5p	1		4									4	1
1 ...............N...... 22	TGAGGTAGTAGGTTGNATAGTT	5p	1	4										4	1
1 ................A.. 19	GAGGTAGTAGGTTGTAAAG	5p	1				4							4	1
2 A................ 17	AGAGGTAGTAGGTTGTA	5p	1									4		4	1
1 .............A.... 18	TGAGGTAGTAGGTAGTAT	5p	1				4							4	1
1 ................N... 20	AGGTAGTAGGTTGTATNGTT	5p	1					4						4	1
2 T.................. 19	TGGTAGTAGGTTGTATAGT	5p	1							4				4	1
1 .........A........... 21	GAGGTAGTAAGTTGTATAGTT	5p	1						3					3	1
1 ................C.. 19	TGAGGTAGTAGGTTGTCTA	5p	1				3							3	1
1 ..G............... 18	TGGGGTAGTAGGTTGTAT	5p	1									3		3	1
1 ...A................ 20	TGAAGTAGTAGGTTGTATAG	5p	1										3	3	1
1 ......... ........... 20	TGAGGTAGTGGTTGTATAGT	5p	1						3					3	1
1 ...............G...... 22	GAGGTAGTAGGTTGTGTAGTTT	5p	1						3					3	1
2 C................. 18	CGGTAGTAGGTTGTATAG	5p	1										3	3	1
1 ............A......... 22	ATGAGGTAGTAGATTGTATAGT	5p	1									3		3	1
1 .......C.............. 22	GAGGTAGCAGGTTGTATAGTTT	5p	1									3		3	1
1 ....C.............. 19	GAGGCAGTAGGTTGTATAG	5p	1									3		3	1
1 ............N......... 22	TGAGGTAGTAGGNTGTATAGTT	5p	1										3	3	1
1 ........A.......... 19	GGTAGTAGATTGTATAGTT	5p	1									3		3	1
1 .............C.... 18	TGAGGTAGTAGGTCGTAT	5p	1				3							3	1
1 ............A..... 18	TGAGGTAGTAGGATGTAT	5p	1						3					3	1
1 ...........T............ 24	TGAGGTAGTAGTTTGTATAGTTTT	5p	1									3		3	1
1 ................G... 20	GAGGTAGTAGGTTGTAGAGT	5p	1				3							3	1
1 ..............C.... 19	GAGGTAGTAGGTTGCATAG	5p	1				3							3	1
2 G................... 20	GGGTAGTAGGTTGTATAGTT	5p	1							3				3	1
1 ........... .......... 21	GAGGTAGTAGGTGTATAGTTT	5p	1							3				3	1
1 ................C... 20	GAGGTAGTAGGTTGTACAGT	5p	1							3				3	1
2 G................... 20	GTGAGGTAGTAGGTTGTATA	5p	1			3								3	1
1 ...................A.. 22	GAGGTAGTAGGTTGTATAGATT	5p	1					3						3	1
1 .............C.......... 24	TGAGGTAGTAGGTCGTATAGTTTT	5p	1									3		3	1
1 .................C.. 20	GAGGTAGTAGGTTGTATCGT	5p	1				3							3	1
1 ........G............. 22	GAGGTAGTGGGTTGTATAGTTT	5p	1									3		3	1
2 T....................... 24	TTGAGGTAGTAGGTTGTATAGTTT	5p	1										3	3	1
2 A................. 18	AGAGGTAGTAGGTTGTAT	5p	1									3		3	1
1 .............G......... 23	TGAGGTAGTAGGTGGTATAGTTT	5p	1			3								3	1
1 ..............A... 18	TGAGGTAGTAGGTTATAT	5p	1				3							3	1
1 ..............A..... 20	TGAGGTAGTAGGTTATATAG	5p	1						3					3	1
2 T................ 17	TAGGTAGTAGGTTGTAT	5p	1										3	3	1
1 .................T.... 22	GAGGTAGTAGGTTGTATTGTTT	5p	1								3			3	1
1 ......C........... 18	TGAGGTCGTAGGTTGTAT	5p	1									3		3	1
1 ..................A 18	AGGTAGTAGGTTGTATAGA	5p	1				3							3	1
1 .................T.. 20	AGGTAGTAGGTTGTATATTT	5p	1					3						3	1
1 ............G........ 21	GAGGTAGTAGGTGGTATAGTT	5p	1						3					3	1
1 ...C................... 23	TGACGTAGTAGGTTGTATAGTTT	5p	1					3						3	1
1 .........G.......... 20	TGAGGTAGTGGGTTGTATAG	5p	1									3		3	1
1 ..........T......... 20	GAGGTAGTAGTTTGTATAGT	5p	1							3				3	1
1 .............G... 17	TGAGGTAGTAGGTGGTA	5p	1				3							3	1
1 ..G.............. 17	TGGGGTAGTAGGTTGTA	5p	1									3		3	1
1 ..................C 18	GAGGTAGTAGGTTGTATAC	5p	1				3							3	1
1 ..........C........... 22	GAGGTAGTAGCTTGTATAGTTT	5p	1									3		3	1
1 ......N............... 22	TGAGGTNGTAGGTTGTATAGTT	5p	1									3		3	1
1 ..G..................... 24	TGGGGTAGTAGGTTGTATAGTTTT	5p	1							3				3	1
1 ....A................. 22	GAGGAAGTAGGTTGTATAGTTT	5p	1									3		3	1
1 .......................A 23	ATGAGGTAGTAGGTTGTATAGTTA	5p	1									3		3	1
1 .....................T 21	CTATACAATCTACTGTCTTTCT	3p	1								5	5		10	2
1 ........C............. 22	CTATACAACCTACTGTCTTTCC	3p	1								3			3	1
cluster No. 2
47697485 TGCATGTTCCCAGGTTGAGGTAGTAGGTTGTATAGTTTAGAATTGTATCAAGGGAGATAACTGTACAGCCTCCTAGCTTTCCTTGGGTCTTGCACA 47697390 new hairpin
1 .................................AC..................................... 72 hsa-let-7a-2
1 .................................AC...................................... 73 mdo-let-7a-2
3 CG.....C.......C..........................G..AC.A.......................................A....... 96 rno-let-7a-2
1 ...C.............................AC..................................... 72 mml-let-7a-2
1 .................................AC.................................... 71 ptr-let-7a-2
2 C.........................................G..AC.........................................A....... 96 mmu-let-7a-2
2 C............................................AC................................................. 96 cfa-let-7a-2
1 ...................... 22	TGAGGTAGTAGGTTGTATAGTT	5p	0	5028	3371	162394	13846	183686	254451	160941	7894	153114	67058	1011783	10
1 ..................... 21	TGAGGTAGTAGGTTGTATAGT	5p	0	170	88	9414	2049	14875	22118	14732	686	15174	7309	86615	10
1 ....................... 23	TGAGGTAGTAGGTTGTATAGTTT	5p	0	222	132	10302	865	12993	19393	11239	657	11656	5755	73214	10
1 ..................... 21	GAGGTAGTAGGTTGTATAGTT	5p	0	216	63	4314	206	4945	4381	4161	1407	4476	66	24235	10
1 .................... 20	TGAGGTAGTAGGTTGTATAG	5p	0	12	11	873	880	1379	2403	2012	81	2395	1166	11212	10
1 .................... 20	AGGTAGTAGGTTGTATAGTT	5p	0	20	3	469	28	548	433	426	137	525		2589	9
1 .................... 20	GAGGTAGTAGGTTGTATAGT	5p	0	10	3	290	30	423	415	495	120	460	5	2251	10
1 ...................... 22	GAGGTAGTAGGTTGTATAGTTT	5p	0	12	5	297	16	406	385	374	103	478		2076	9
1 ................... 19	TGAGGTAGTAGGTTGTATA	5p	0	6		104	151	147	235	229	12	390	154	1428	9
1 .................. 18	TGAGGTAGTAGGTTGTAT	5p	0			124	57	130	199	282	17	359	117	1285	8
1 ........................ 24	TGAGGTAGTAGGTTGTATAGTTTA	5p	0			61	19	70	70	63	9	72	36	400	8
1 ................... 19	GAGGTAGTAGGTTGTATAG	5p	0			20	17	41	43	45	13	70		249	7
1 ..................... 21	AGGTAGTAGGTTGTATAGTTT	5p	0			30		33	45	32	21	57		218	6
1 ................... 19	AGGTAGTAGGTTGTATAGT	5p	0			24	3	38	28	54	10	43		200	7
1 ................ 16	GAGGTAGTAGGTTGTA	5p	0			28	7	19	13	35	24	40		166	7
1 ...................... 22	TTGAGGTAGTAGGTTGTATAGT	5p	0			10		20	18	17		17	54	136	6
1 ................ 16	TGAGGTAGTAGGTTGT	5p	0			7	44	11	6	11		27	9	115	7
1 ....................... 23	TTGAGGTAGTAGGTTGTATAGTT	5p	0			7		6	11	8		7	48	87	6
1 ................. 17	GAGGTAGTAGGTTGTAT	5p	0			8		6	8	8	7	10		47	6
1 .................. 18	GAGGTAGTAGGTTGTATA	5p	0			5		5	4	11		15		40	5
1 .................. 18	AGGTAGTAGGTTGTATAG	5p	0			6				4		8		18	3
1 ..................... 21	TTGAGGTAGTAGGTTGTATAG	5p	0						4	3		3	7	17	4
1 ....................... 23	GAGGTAGTAGGTTGTATAGTTTA	5p	0							3		7		10	2
1 ................... 19	GGTAGTAGGTTGTATAGTT	5p	0								3	4		7	2
1 ................. 17	AGGTAGTAGGTTGTATA	5p	0							3		3		6	2
1 ...................... 23	TGAGGTAGTAGGTTGTATAGTT	5p	0					3		3				6	2
1 ..................... 21	GTTGAGGTAGTAGGTTGTATA	5p	0							4				4	1
1 ........................ 24	TTGAGGTAGTAGGTTGTATAGTTT	5p	0										3	3	1
1 ..................G... 22	TGAGGTAGTAGGTTGTATGGTT	5p	1	8444	1913	103258	13200	102651	132853	105918	6827	120975	51853	647892	10
1 ...........A.......... 22	TGAGGTAGTAGATTGTATAGTT	5p	1	1244	1329	91093	5908	116595	114314	77852	8300	125443	57427	599505	10
1 ......................A 22	TGAGGTAGTAGGTTGTATAGTTA	5p	1	380	172	14400	1347	17312	24304	17255	879	16654	7616	100319	10
1 ..................G.. 21	TGAGGTAGTAGGTTGTATGGT	5p	1	290	52	5365	2558	7389	9928	9501	460	11014	5338	51895	10
1 ........G............. 22	TGAGGTAGGAGGTTGTATAGTT	5p	1	1131	315	12457	855	8228	11573	6343	295	6541	2393	50131	10
1 ...........A......... 21	TGAGGTAGTAGATTGTATAGT	5p	1	53	35	4644	754	7697	8103	6003	671	11231	5431	44622	10
1 ..................G.... 23	TGAGGTAGTAGGTTGTATGGTTT	5p	1	308	68	5655	754	5652	8502	6465	388	7964	3623	39379	10
1 ..........A.......... 21	GAGGTAGTAGATTGTATAGTT	5p	1	126	83	4740	171	4844	3851	3811	2633	6775	60	27094	10
1 ...........A........... 23	TGAGGTAGTAGATTGTATAGTTT	5p	1	25	23	3091	188	4227	4458	2952	435	5460	2597	23456	10
1 .................G... 21	GAGGTAGTAGGTTGTATGGTT	5p	1	523	48	3686	266	3696	2816	3714	1480	4791	54	21074	10
1 .................C.... 22	TGAGGTAGTAGGTTGTACAGTT	5p	1	64	171	3920	133	2490	3583	3502	100	1921	295	16179	10
1 ................G..... 22	TGAGGTAGTAGGTTGTGTAGTT	5p	1	25	136	2151	231	1710	2855	2568	152	1557	160	11545	10
1 ...............G...... 22	TGAGGTAGTAGGTTGGATAGTT	5p	1	214	219	2624	49	1123	2110	422	19	362	34	7176	10
1 ................G 16	TGAGGTAGTAGGTTGTG	5p	1		6	440	363	580	908	1278	88	2315	1021	6999	9
1 .....................A 21	TGAGGTAGTAGGTTGTATAGTA	5p	1	7	23	604	708	901	1444	1225	30	1185	475	6602	10
1 ...........A........ 20	TGAGGTAGTAGATTGTATAG	5p	1	3	7	432	367	763	948	855	105	1849	845	6174	10
1 ........G.............. 23	TGAGGTAGGAGGTTGTATAGTTT	5p	1	114	18	1277	91	906	1396	710	34	775	277	5598	10
1 ...........T.......... 22	TGAGGTAGTAGTTTGTATAGTT	5p	1	18	49	541	127	925	727	616	186	1625	483	5297	10
1 ........G............ 21	TGAGGTAGGAGGTTGTATAGT	5p	1	65	18	1000	145	862	1215	688	29	817	287	5126	10
1 ......................G 22	TGAGGTAGTAGGTTGTATAGTTG	5p	1	10	3	520	129	692	1201	827	46	941	527	4896	10
1 ............A......... 22	TGAGGTAGTAGGATGTATAGTT	5p	1	32	41	985	9	1353	1199	890	19	321	36	4885	10
1 .....................A 21	GAGGTAGTAGGTTGTATAGTTA	5p	1	19		445	25	515	451	517	169	591	5	2737	9
2 A..................... 22	AGAGGTAGTAGGTTGTATAGTT	5p	1	18	35	348	70	297	254	219	41	931	130	2343	10
1 ...............C...... 22	TGAGGTAGTAGGTTGCATAGTT	5p	1	5	63	592	30	382	458	397	11	279	73	2290	10
1 ..................C... 22	TGAGGTAGTAGGTTGTATCGTT	5p	1	3	24	326	80	236	280	225	6	323	753	2256	10
1 ...................T.. 22	TGAGGTAGTAGGTTGTATATTT	5p	1	12	23	359	84	469	359	323	41	374	184	2228	10
1 ......................C 22	TGAGGTAGTAGGTTGTATAGTTC	5p	1	12	4	257	91	307	570	290	16	428	236	2211	10
1 .........A.......... 20	AGGTAGTAGATTGTATAGTT	5p	1	8	4	374	13	392	283	281	172	650		2177	9
1 ..........A......... 20	GAGGTAGTAGATTGTATAGT	5p	1	4	3	261	20	325	287	308	225	650	6	2089	10
1 ................G... 20	AGGTAGTAGGTTGTATGGTT	5p	1	26		353	33	364	268	313	168	561		2086	8
1 ..................T... 22	TGAGGTAGTAGGTTGTATTGTT	5p	1	52	35	431	135	352	293	334	54	259	98	2043	10
1 ............C......... 22	TGAGGTAGTAGGCTGTATAGTT	5p	1	5	10	327	18	328	458	252	5	414	78	1895	10
1 ..G................... 22	TGGGGTAGTAGGTTGTATAGTT	5p	1	6	4	170	16	190	232	157	7	1014	85	1881	10
1 .......... ........... 21	TGAGGTAGTAGTTGTATAGTT	5p	1	8		164	44	441	205	341	24	397	189	1813	9
1 .................G.. 20	GAGGTAGTAGGTTGTATGGT	5p	1	14		241	63	308	226	346	127	467	8	1800	9
2 C..................... 22	CGAGGTAGTAGGTTGTATAGTT	5p	1	25	11	272	97	199	259	213	70	488	142	1776	10
1 ................C..... 22	TGAGGTAGTAGGTTGTCTAGTT	5p	1	4	10	210	27	234	243	194	11	503	289	1725	10
2 T.................... 21	TAGGTAGTAGGTTGTATAGTT	5p	1			7		27	20	22		51	1574	1701	6
1 ............ ......... 21	TGAGGTAGTAGGTGTATAGTT	5p	1	5	3	188	24	374	151	263	27	304	199	1538	10
1 ......C............... 22	TGAGGTCGTAGGTTGTATAGTT	5p	1			78	11	39	45	32	3	806	495	1509	8
1 .....G................ 22	TGAGGGAGTAGGTTGTATAGTT	5p	1	48	45	303	23	194	298	245	37	274	28	1495	10
2 C...................... 23	CTGAGGTAGTAGGTTGTATAGTT	5p	1	19	5	215	21	236	325	250	43	217	62	1393	10
1 ...........C.......... 22	TGAGGTAGTAGCTTGTATAGTT	5p	1	3	7	79	15	100	89	49	5	668	373	1388	10
1 .......G............. 21	GAGGTAGGAGGTTGTATAGTT	5p	1	50	8	354	18	228	217	170	70	230	3	1348	10
1 .....................G 21	TGAGGTAGTAGGTTGTATAGTG	5p	1	16	35	360	220	168	282	90		118	48	1337	9
1 .................G.... 22	GAGGTAGTAGGTTGTATGGTTT	5p	1	17		235	22	191	178	230	103	352		1328	8
1 .................G.... 22	TGAGGTAGTAGGTTGTAGAGTT	5p	1	35	41	480	45	199	364	85	4	58	7	1318	10
1 ..........A........... 22	GAGGTAGTAGATTGTATAGTTT	5p	1		3	170	10	191	183	160	126	386		1229	8
1 ........A............. 22	TGAGGTAGAAGGTTGTATAGTT	5p	1	14	52	91		135	158	302	12	346	68	1178	9
1 .......................T 23	TGAGGTAGTAGGTTGTATAGTTTT	5p	1	4	3	180	20	213	270	152	10	223	95	1170	10
1 ............G......... 22	TGAGGTAGTAGGGTGTATAGTT	5p	1	12	13	291	24	146	263	128	5	214	44	1140	10
1 ...........A...... 18	TGAGGTAGTAGATTGTAT	5p	1			87	27	134	148	181	22	338	154	1091	8
1 .....C................ 22	TGAGGCAGTAGGTTGTATAGTT	5p	1	15	39	124	21	164	182	155	8	295	72	1075	10
1 ................G...... 23	TGAGGTAGTAGGTTGTGTAGTTT	5p	1		8	149	44	149	268	297	8	114	23	1060	9
1 ....................A 20	TGAGGTAGTAGGTTGTATAGA	5p	1		4	37	423	100	163	151	3	115	63	1059	9
1 ...................A 19	TGAGGTAGTAGGTTGTATAA	5p	1			47	422	65	115	121	4	192	79	1045	8
1 ......G............... 22	TGAGGTGGTAGGTTGTATAGTT	5p	1			79	10	99	126	69	10	528	73	994	8
2 G..................... 22	GGAGGTAGTAGGTTGTATAGTT	5p	1	6	15	167	7	103	78	65	6	299	240	986	10
1 ........C............. 22	TGAGGTAGCAGGTTGTATAGTT	5p	1	3	10	121	19	112	154	82		373	105	979	9
1 .....................C 21	TGAGGTAGTAGGTTGTATAGTC	5p	1		7	141	274	116	138	102	6	131	53	968	9
1 ..C................... 22	TGCGGTAGTAGGTTGTATAGTT	5p	1		8	69	9	59	63	51	3	327	302	891	9
2 G...................... 23	GTGAGGTAGTAGGTTGTATAGTT	5p	1	30	4	164	17	195	160	190	35	94		889	9
1 ..........T........... 22	TGAGGTAGTATGTTGTATAGTT	5p	1	3		118	14	147	138	123	5	168	98	814	9
1 .........C............ 22	TGAGGTAGTCGGTTGTATAGTT	5p	1	4	5	83	11	74	55	46	8	226	274	786	10
1 ...................G... 23	TTGAGGTAGTAGGTTGTATGGTT	5p	1	10		104	23	112	156	117	4	178	72	776	9
1 ...........A....... 19	TGAGGTAGTAGATTGTATA	5p	1			62	25	82	91	85	10	305	106	766	8
1 ........G........... 20	TGAGGTAGGAGGTTGTATAG	5p	1	4		90	74	92	162	111	9	159	50	751	9
1 ..............T....... 22	TGAGGTAGTAGGTTTTATAGTT	5p	1	23	17	140	19	119	90	126	11	148	53	746	10
2 G..................... 22	GTGAGGTAGTAGGTTGTATAGT	5p	1	8		106	17	149	137	175	32	92		716	8
1 ................G.... 21	TGAGGTAGTAGGTTGTGTAGT	5p	1		5	69	166	74	110	145	6	103	11	689	9
1 .............C........ 22	TGAGGTAGTAGGTCGTATAGTT	5p	1		3	94	12	120	172	92	3	137	48	681	9
1 ...T.................. 22	TGATGTAGTAGGTTGTATAGTT	5p	1			85	10	122	90	107	5	149	103	671	8
1 ................N..... 22	TGAGGTAGTAGGTTGTNTAGTT	5p	1		4	113		170	325	58				670	5
1 .......T.............. 22	TGAGGTATTAGGTTGTATAGTT	5p	1			81	13	111	105	86	6	174	65	641	8
1 .................C... 21	TGAGGTAGTAGGTTGTACAGT	5p	1			72	143	79	91	132	3	90	18	628	8
1 ..........A........... 22	TGAGGTAGTAAGTTGTATAGTT	5p	1		4	50	9	112	102	131	4	111	48	571	9
1 .........G............ 22	TGAGGTAGTGGGTTGTATAGTT	5p	1		3	79	10	74	125	63		159	51	564	8
1 ...............A...... 22	TGAGGTAGTAGGTTGAATAGTT	5p	1	6	12	115		105	141	137		31	14	561	8
1 ..............A....... 22	TGAGGTAGTAGGTTATATAGTT	5p	1	5	6	91	5	110	115	92		100	35	559	9
1 ....T................. 22	TGAGTTAGTAGGTTGTATAGTT	5p	1	13		49	4	89	94	91	4	109	72	525	9
1 ...............G..... 21	TGAGGTAGTAGGTTGGATAGT	5p	1	6	7	159	7	101	176	36		20	4	516	9
1 .....A................ 22	TGAGGAAGTAGGTTGTATAGTT	5p	1	26	37	65	3	67	62	125	7	91	26	509	10
1 ................T..... 22	TGAGGTAGTAGGTTGTTTAGTT	5p	1	7	6	80	46	73	96	64	14	91	26	503	10
1 ...............G....... 23	TGAGGTAGTAGGTTGGATAGTTT	5p	1	4	13	174		77	153	38		25	3	487	8
1 ...........A..... 17	TGAGGTAGTAGATTGTA	5p	1			29	46	45	45	60	9	179	66	479	8
1 ..............C...... 21	GAGGTAGTAGGTTGCATAGTT	5p	1	4		121	7	78	76	91	7	89	3	476	9
1 ...................G.. 22	TTGAGGTAGTAGGTTGTATGGT	5p	1			48	13	80	98	58		95	49	441	7
1 ..................G 18	TGAGGTAGTAGGTTGTATG	5p	1			27	89	37	55	59	3	84	47	401	8
1 ..................G..... 24	TGAGGTAGTAGGTTGTATGGTTTA	5p	1	4		51	28	58	79	67	4	77	32	400	9
1 ..............G...... 21	GAGGTAGTAGGTTGGATAGTT	5p	1	9		115		61	69	51	27	50		382	7
1 ............A........ 21	TGAGGTAGTAGGATGTATAGT	5p	1		5	60	3	105	107	63		28	3	374	8
1 ...................A.. 22	TGAGGTAGTAGGTTGTATAATT	5p	1			44	108	55	50	62	3	29	21	372	8
1 ...........T......... 21	TGAGGTAGTAGTTTGTATAGT	5p	1			24	60	66	42	30		98	48	368	7
1 ..............C....... 22	TGAGGTAGTAGGTTCTATAGTT	5p	1		9	45	10	74	64	59	3	73	29	366	9
1 ....G................ 21	GAGGGAGTAGGTTGTATAGTT	5p	1	13	4	103		56	49	22	11	93		351	8
1 .................C..... 23	TGAGGTAGTAGGTTGTACAGTTT	5p	1		6	71		54	87	87		38	3	346	7
1 .................A.... 22	TGAGGTAGTAGGTTGTAAAGTT	5p	1		10	50	13	69	90	67		25	12	336	8
1 ...................T 19	TGAGGTAGTAGGTTGTATAT	5p	1			14	206	25	18	25		34	8	330	7
1 ....................G 20	TGAGGTAGTAGGTTGTATAGG	5p	1	3	3	51	79	43	62	53		22	13	329	9
1 ..........C........... 22	TGAGGTAGTACGTTGTATAGTT	5p	1	4	3	31	4	70	42	34	4	102	34	328	10
1 ...................C.. 22	TGAGGTAGTAGGTTGTATACTT	5p	1			52	55	52	53	62		32	16	322	7
1 .............A........ 22	TGAGGTAGTAGGTAGTATAGTT	5p	1	3	13	46		61	63	71	4	34	19	314	9
1 ............A.......... 23	TGAGGTAGTAGGATGTATAGTTT	5p	1			52		100	88	47		23		310	5
1 ...A.................. 22	TGAAGTAGTAGGTTGTATAGTT	5p	1			41	5	62	58	40	4	55	37	302	8
1 ....................C 20	TGAGGTAGTAGGTTGTATAGC	5p	1		3	20	139	22	40	29		28	11	292	8
1 .......A.............. 22	TGAGGTAATAGGTTGTATAGTT	5p	1			40	3	47	66	28		78	22	284	7
1 ....................G.. 23	TGAGGTAGTAGGTTGTATAGGTT	5p	1		10	64	12	48	62	47	4	21		268	8
1 .......C.............. 22	TGAGGTACTAGGTTGTATAGTT	5p	1			21	10	55	50	43		68	19	266	7
2 C................... 20	CGGTAGTAGGTTGTATAGTT	5p	1										262	262	1
1 ....................A 20	AGGTAGTAGGTTGTATAGTTA	5p	1			48		44	33	39	18	70		252	6
1 ..................C.. 21	TGAGGTAGTAGGTTGTATCGT	5p	1			17	67	9	29	26		32	71	251	7
1 ....A................. 22	TGAGATAGTAGGTTGTATAGTT	5p	1		4	32		40	46	39		65	17	243	7
1 ..........A........ 19	GAGGTAGTAGATTGTATAG	5p	1			22	9	33	20	38	26	86		234	7
1 .............G........ 22	TGAGGTAGTAGGTGGTATAGTT	5p	1	5	11	41	4	35	65	21		37	14	233	9
1 ................G... 20	TGAGGTAGTAGGTTGTGTAG	5p	1			7	141	11	17	28		13	9	226	7
1 ..................T 18	TGAGGTAGTAGGTTGTATT	5p	1			11	55	37	24	31		43	24	225	7
1 ..................T.. 21	TGAGGTAGTAGGTTGTATTGT	5p	1			19	88	27	21	36	4	22	5	222	8
1 .........T............ 22	TGAGGTAGTTGGTTGTATAGTT	5p	1			26		32	43	32		69	16	218	6
2 A.................... 21	AGAGGTAGTAGGTTGTATAGT	5p	1			24	14	19	21	22	5	91	16	212	8
1 ......G............. 20	AGGTAGGAGGTTGTATAGTT	5p	1	4		51		35	37	21	14	41		203	7
1 ...........G......... 21	GAGGTAGTAGGGTGTATAGTT	5p	1		3	34		15	24	40	32	52		200	7
1 ..T................... 22	TGTGGTAGTAGGTTGTATAGTT	5p	1			21		28	31	25		74	18	197	6
1 ...........T........... 23	TGAGGTAGTAGTTTGTATAGTTT	5p	1			20		33	31	26	4	53	27	194	7
1 ...............C.... 20	TGAGGTAGTAGGTTGCATAG	5p	1				177			10		6		193	3
1 ................C.... 21	TGAGGTAGTAGGTTGTCTAGT	5p	1			10	40	17	16	29		52	24	188	7
1 ....................A.. 23	TGAGGTAGTAGGTTGTATAGATT	5p	1		3	22	19	38	43	46		10		181	7
1 .......G.............. 22	GAGGTAGGAGGTTGTATAGTTT	5p	1	11		43		36	27	27	6	28		178	7
1 ....C................. 22	TGAGCTAGTAGGTTGTATAGTT	5p	1			21	3	36	30	25		44	18	177	7
1 ............C........ 21	TGAGGTAGTAGGCTGTATAGT	5p	1			16		23	45	29		53	9	175	6
1 .................C.. 20	TGAGGTAGTAGGTTGTACAG	5p	1			8	136	5	8	6		11		174	6
1 ................G.. 19	AGGTAGTAGGTTGTATGGT	5p	1			25	7	27	21	27	13	50		170	7
2 C.................... 21	CGAGGTAGTAGGTTGTATAGT	5p	1			18	12	24	22	25	6	44	13	164	8
1 ...C.................. 22	TGACGTAGTAGGTTGTATAGTT	5p	1			15	5	34	26	28		46	7	161	7
2 T................... 20	TAGGTAGTAGGTTGTATAGT	5p	1									6	154	160	2
1 ..........C.......... 21	GAGGTAGTAGCTTGTATAGTT	5p	1			6		11	4	9	17	107	5	159	7
2 A...................... 23	AGAGGTAGTAGGTTGTATAGTTT	5p	1		3	20	6	15	15	21		64	14	158	8
2 T..................... 22	TAGGTAGTAGGTTGTATAGTTT	5p	1						6			4	148	158	3
1 .................G... 21	TGAGGTAGTAGGTTGTAGAGT	5p	1	3		24	37	26	43	11		10	3	157	8
1 .................A 17	TGAGGTAGTAGGTTGTAA	5p	1			4	100	7	5	10		18	10	154	7
2 C..................... 22	CTGAGGTAGTAGGTTGTATAGT	5p	1			18	6	27	43	31		19	6	150	7
1 .....G............... 21	TGAGGGAGTAGGTTGTATAGT	5p	1			21	6	13	31	33	8	32	5	149	8
1 ......C.............. 21	TGAGGTCGTAGGTTGTATAGT	5p	1			6		3	6			58	74	147	5
1 ....................A 20	GAGGTAGTAGGTTGTATAGTA	5p	1		3	19	10	29	23	30	4	27		145	8
1 ......T............... 22	TGAGGTTGTAGGTTGTATAGTT	5p	1			14		24	34	15	3	48	7	145	7
1 ................G.... 21	AGGTAGTAGGTTGTATGGTTT	5p	1			29		22	10	27	13	41		142	6
1 ...................C 19	TGAGGTAGTAGGTTGTATAC	5p	1				134					3	5	142	3
1 .......G............ 20	GAGGTAGGAGGTTGTATAGT	5p	1			36		22	25	25	10	24		142	6
1 ....................C.. 23	TGAGGTAGTAGGTTGTATAGCTT	5p	1		4	22	37	18	28	16		11	6	142	8
2 G.................... 21	GTGAGGTAGTAGGTTGTATAG	5p	1	4		17	8	24	18	31	8	29		139	8
1 ..................C.... 23	TGAGGTAGTAGGTTGTATCGTTT	5p	1			14	3	7	20	8		25	61	138	7
1 .......... .......... 20	TGAGGTAGTAGTTGTATAGT	5p	1			10	4	27	11	23		33	28	136	7
1 .................A.. 20	TGAGGTAGTAGGTTGTAAAG	5p	1				136							136	1
1 ...............C....... 23	TGAGGTAGTAGGTTGCATAGTTT	5p	1			34		20	29	27		17	8	135	6
2 C...................... 23	CGAGGTAGTAGGTTGTATAGTTT	5p	1			12	7	14	28	15	8	39	12	135	8
1 ............C.......... 23	TGAGGTAGTAGGCTGTATAGTTT	5p	1			20	4	23	38	16		29	4	134	7
1 .................A... 21	TGAGGTAGTAGGTTGTAAAGT	5p	1			6	83	8	16	13		4	3	133	7
1 ..G.................. 21	TGGGGTAGTAGGTTGTATAGT	5p	1			9		10	25	10		63	8	125	6
1 ........... ........... 22	TGAGGTAGTAGTTGTATAGTTT	5p	1			11		31	20	14		33	15	124	6
1 .......................C 23	TGAGGTAGTAGGTTGTATAGTTTC	5p	1			15	10	16	25	19		26	12	123	7
1 .....................G 21	GAGGTAGTAGGTTGTATAGTTG	5p	1			17		14	28	17	7	39		122	6
1 ......C................ 23	TGAGGTCGTAGGTTGTATAGTTT	5p	1			3		5	8	5		66	35	122	6
1 ..G.................... 23	TGGGGTAGTAGGTTGTATAGTTT	5p	1			17		9	16	10		57	8	117	6
1 ...........C......... 21	TGAGGTAGTAGCTTGTATAGT	5p	1			8		5	5	3		67	28	116	6
1 .....C............... 21	TGAGGCAGTAGGTTGTATAGT	5p	1		4	9		19	12	24	4	36	7	115	8
1 ..........T.......... 21	GAGGTAGTAGTTTGTATAGTT	5p	1			13		19	14	13	26	29		114	6
1 ............ .......... 22	TGAGGTAGTAGGTGTATAGTTT	5p	1			14		25	14	18		21	17	109	6
1 .........C........... 21	TGAGGTAGTCGGTTGTATAGT	5p	1			5	3	10	7	15		28	40	108	7
2 G.................... 21	GGAGGTAGTAGGTTGTATAGT	5p	1			6		13	5	7		34	40	105	6
1 ............A......... 22	TTGAGGTAGTAGATTGTATAGT	5p	1			14		19	27	8		30	7	105	6
1 ..................T.... 23	TGAGGTAGTAGGTTGTATTGTTT	5p	1			22	6	18	22	13	3	16	5	105	8
1 ...................T... 23	TGAGGTAGTAGGTTGTATATTTT	5p	1			11	4	19	20	19	4	21	5	103	8
1 ...............C..... 21	TGAGGTAGTAGGTTGCATAGT	5p	1			20		15	17	24		20	7	103	6
1 .........A........... 21	AGGTAGTAGATTGTATAGTTT	5p	1			14		11	10	9	12	45		101	6
1 ........C............ 21	TGAGGTAGCAGGTTGTATAGT	5p	1			10		8	17	9		42	14	100	6
1 ................G.. 19	TGAGGTAGTAGGTTGTGTA	5p	1				28	7	10	12		31	11	99	6
1 ................C...... 23	TGAGGTAGTAGGTTGTCTAGTTT	5p	1			15		7	16	10		28	22	98	6
1 .................T... 21	GAGGTAGTAGGTTGTATTGTT	5p	1	6		12	5	16	11	14	24	8		96	8
1 .....G................. 23	TGAGGGAGTAGGTTGTATAGTTT	5p	1			19		8	23	20		25		95	5
1 ...........T........ 20	TGAGGTAGTAGTTTGTATAG	5p	1				67	7	4	7		5	3	93	6
1 .....C................. 23	TGAGGCAGTAGGTTGTATAGTTT	5p	1		4	5		18	19	10		27	6	89	7
2 C....................... 24	CTGAGGTAGTAGGTTGTATAGTTT	5p	1			13		11	31	14		14	5	88	6
1 ............G........ 21	TGAGGTAGTAGGGTGTATAGT	5p	1		3	16		15	17	13		16	4	84	7
1 ...............G.... 20	TGAGGTAGTAGGTTGGATAG	5p	1			17	33	11	13	3		4		81	6
1 .....................C 21	GAGGTAGTAGGTTGTATAGTTC	5p	1			11	5	10	20	7	4	24		81	7
1 ................C.... 21	GAGGTAGTAGGTTGTACAGTT	5p	1			13		14	13	15	5	17		77	6
1 ........C............ 21	GAGGTAGTCGGTTGTATAGTT	5p	1			3		3		9	9	52		76	5
1 ....C................ 21	GAGGCAGTAGGTTGTATAGTT	5p	1		4	5		8	7	10		42		76	6
1 ......G.............. 21	TGAGGTGGTAGGTTGTATAGT	5p	1			4		9	13	5		38	6	75	6
1 ..C.................. 21	TGCGGTAGTAGGTTGTATAGT	5p	1			6	3	3	3	3		28	29	75	7
1 ..........T.......... 21	TGAGGTAGTATGTTGTATAGT	5p	1			3		11	13	12		25	11	75	6
1 ..C.................... 23	TGCGGTAGTAGGTTGTATAGTTT	5p	1			4			7	5		36	21	73	5
1 ...T................. 21	TGATGTAGTAGGTTGTATAGT	5p	1			5		12	16	9		21	10	73	6
1 ..................T.. 21	GAGGTAGTAGGTTGTATATTT	5p	1			6		16	5	9	16	20		72	6
1 ........A............ 21	TGAGGTAGAAGGTTGTATAGT	5p	1			3		9	10	20		23	5	70	6
1 ........A.............. 23	TGAGGTAGAAGGTTGTATAGTTT	5p	1		4	5		7	12	11		23	8	70	7
1 ........G............... 24	TGAGGTAGGAGGTTGTATAGTTTA	5p	1			11		10	17	16		10	4	68	6
1 ...T................... 23	TGATGTAGTAGGTTGTATAGTTT	5p	1			10		5	9	19		13	12	68	6
1 .............G...... 20	AGGTAGTAGGTTGGATAGTT	5p	1			24		16	12	8		7		67	5
1 ...........C........... 23	TGAGGTAGTAGCTTGTATAGTTT	5p	1					7	5			32	23	67	4
1 ..........T............ 23	TGAGGTAGTATGTTGTATAGTTT	5p	1			13		9	8	10		13	13	66	6
2 G...................... 23	GGAGGTAGTAGGTTGTATAGTTT	5p	1			12		3	7			15	29	66	5
1 ...............C... 19	TGAGGTAGTAGGTTGCATA	5p	1				63							63	1
1 ........C.............. 23	TGAGGTAGCAGGTTGTATAGTTT	5p	1			7		8	9	6		22	11	63	6
1 .......T............. 21	TGAGGTATTAGGTTGTATAGT	5p	1			4		13	11	13		16	6	63	6
1 ............G.......... 23	TGAGGTAGTAGGGTGTATAGTTT	5p	1			8		10	19	14		11		62	5
1 ...............A..... 21	TGAGGTAGTAGGTTGAATAGT	5p	1			10		10	15	26				61	4
1 ..............T...... 21	TGAGGTAGTAGGTTTTATAGT	5p	1			5		8	11	8		23	6	61	6
1 ........G.......... 19	TGAGGTAGGAGGTTGTATA	5p	1			13		7	9	10		21		60	5
1 ...........A............ 24	TGAGGTAGTAGATTGTATAGTTTA	5p	1			6	4	13	6	8		17	6	60	7
1 ...............G..... 21	GAGGTAGTAGGTTGTGTAGTT	5p	1	7		11	4	3	11	4	5	13		58	8
2 N..................... 22	NGAGGTAGTAGGTTGTATAGTT	5p	1									58		58	1
1 ......G................ 23	TGAGGTGGTAGGTTGTATAGTTT	5p	1					7	10	4		29	8	58	5
1 .................G..... 23	TGAGGTAGTAGGTTGTAGAGTTT	5p	1			16		7	23	4		7		57	5
1 .......................G 23	TGAGGTAGTAGGTTGTATAGTTTG	5p	1				12	8	13	10		9	3	55	6
1 ....A................ 21	GAGGAAGTAGGTTGTATAGTT	5p	1			4			3	9	7	32		55	5
1 .........C............. 23	TGAGGTAGTCGGTTGTATAGTTT	5p	1			6		4	7	6		12	20	55	6
1 .......T............... 23	TGAGGTATTAGGTTGTATAGTTT	5p	1			6		7	16	3		16	4	52	6
1 ...........T..... 17	TGAGGTAGTAGTTTGTA	5p	1				26		5	3		13	5	52	5
1 ..........A...... 17	GAGGTAGTAGATTGTAT	5p	1			5		5	4	7	7	23		51	6
1 ..............T........ 23	TGAGGTAGTAGGTTTTATAGTTT	5p	1			7		9	9	10		8	8	51	6
1 .............C....... 21	TGAGGTAGTAGGTCGTATAGT	5p	1			6		8	8	10		14	4	50	6
1 .............C......... 23	TGAGGTAGTAGGTCGTATAGTTT	5p	1			4		11	16	6	3	9		49	6
1 .........G........... 21	TGAGGTAGTGGGTTGTATAGT	5p	1			5	3	8	9	5		14	5	49	7
1 .....A............... 21	TGAGGAAGTAGGTTGTATAGT	5p	1			4		7	5	12		17	4	49	6
1 ..........A.......... 21	TGAGGTAGTAAGTTGTATAGT	5p	1					5	12	17		9	6	49	5
1 .................G 17	TGAGGTAGTAGGTTGTAG	5p	1			3	22	3				13	7	48	5
1 ....T................ 21	TGAGTTAGTAGGTTGTATAGT	5p	1			5	5	8	5	4		12	9	48	7
1 ....T.................. 23	TGAGTTAGTAGGTTGTATAGTTT	5p	1			3		6	9	13		12	4	47	6
1 ................C... 20	TGAGGTAGTAGGTTGTCTAG	5p	1				35	3				6	3	47	4
1 ..........A....... 18	GAGGTAGTAGATTGTATA	5p	1					6	3	9	7	21		46	5
1 ...........A......... 21	GAGGTAGTAGGATGTATAGTT	5p	1		3	9		13	8			13		46	5
1 ................T.... 21	TGAGGTAGTAGGTTGTTTAGT	5p	1			4	16	5	5	4	5	7		46	7
1 ...........T...... 18	TGAGGTAGTAGTTTGTAT	5p	1				37			3		5		45	3
1 ..............A...... 21	TGAGGTAGTAGGTTATATAGT	5p	1			4	3	9	17	5		3	4	45	7
1 ...........C......... 21	GAGGTAGTAGGCTGTATAGTT	5p	1			9		9	9	3		14		44	5
1 .....A................. 23	TGAGGAAGTAGGTTGTATAGTTT	5p	1			7		11	4	9		10	3	44	6
1 ................N.... 21	TGAGGTAGTAGGTTGTNTAGT	5p	1			6		12	22	4				44	4
1 ................N...... 23	TGAGGTAGTAGGTTGTNTAGTTT	5p	1			9		9	22	4				44	4
1 ............A....... 20	TGAGGTAGTAGGATGTATAG	5p	1			7		10	12	9		4		42	5
1 ..............A.. 17	TGAGGTAGTAGGTTATA	5p	1				41							41	1
1 ..............G..... 20	GAGGTAGTAGGTTGGATAGT	5p	1			3		5	11	6	4	12		41	6
1 .......... .......... 20	GAGGTAGTAGTTGTATAGTT	5p	1					18		12	6	5		41	4
2 T................... 20	TGGTAGTAGGTTGTATAGTT	5p	1			4		6	5	11		10	4	40	6
1 ................T... 20	TGAGGTAGTAGGTTGTTTAG	5p	1				36					3		39	2
1 ...............A....... 23	TGAGGTAGTAGGTTGAATAGTTT	5p	1			12		7	7	13				39	4
1 ........... ......... 20	GAGGTAGTAGGTGTATAGTT	5p	1			6		7	4	6	8	7		38	6
1 ..............C....... 22	GAGGTAGTAGGTTGCATAGTTT	5p	1			6		3	5	7	6	11		38	6
1 .................G.. 20	TGAGGTAGTAGGTTGTAGAG	5p	1			5	15	3	6	4		3		36	6
1 ..............C..... 20	GAGGTAGTAGGTTGCATAGT	5p	1			6		5	3	11		10		35	5
1 ................T...... 23	TGAGGTAGTAGGTTGTTTAGTTT	5p	1			8		4	11	8		4		35	5
1 ...................A... 23	TGAGGTAGTAGGTTGTATAATTT	5p	1				16	3		8		7		34	4
1 ........ ............. 21	TGAGGTAGAGGTTGTATAGTT	5p	1					8	6	5		9	6	34	5
1 ..............G....... 22	GAGGTAGTAGGTTGGATAGTTT	5p	1			12		7		6		9		34	4
1 ..................C 18	TGAGGTAGTAGGTTGTATC	5p	1				33							33	1
1 .........G............. 23	TGAGGTAGTGGGTTGTATAGTTT	5p	1			3		6	6	7		10		32	5
1 ......G.............. 21	AGGTAGGAGGTTGTATAGTTT	5p	1	3		6		4	5		8	6		32	6
1 ..........C.......... 21	TGAGGTAGTACGTTGTATAGT	5p	1					6	7	7		12		32	4
1 ..............A........ 23	TGAGGTAGTAGGTTATATAGTTT	5p	1			4		8	4	10		5		31	5
1 ....................C 20	GAGGTAGTAGGTTGTATAGTC	5p	1			5		8	7	8		3		31	5
1 ..........A............ 23	TGAGGTAGTAAGTTGTATAGTTT	5p	1			5		4	4	11		7		31	5
1 ................T... 20	AGGTAGTAGGTTGTATTGTT	5p	1			4		3	3		15	5		30	5
2 A................... 20	AGAGGTAGTAGGTTGTATAG	5p	1			3	3		3	3		15	3	30	6
1 ................T 16	TGAGGTAGTAGGTTGTT	5p	1				8	3		5		13		29	4
1 .............A....... 21	TGAGGTAGTAGGTAGTATAGT	5p	1			5		6	4	5		4	4	28	6
2 G....................... 24	GTGAGGTAGTAGGTTGTATAGTTT	5p	1			4		4	9	5	3	3		28	6
1 .........T........... 21	TGAGGTAGTTGGTTGTATAGT	5p	1			8		3	5	4		8		28	5
1 .......C............. 21	GAGGTAGCAGGTTGTATAGTT	5p	1			3				7	5	13		28	4
1 ...................G.... 24	TTGAGGTAGTAGGTTGTATGGTTT	5p	1	3		5		4	6	3		7		28	6
1 ....................G 20	GAGGTAGTAGGTTGTATAGTG	5p	1			6	4			7	4	6		27	5
1 ....G................. 22	GAGGGAGTAGGTTGTATAGTTT	5p	1			9		4	4			9		26	4
1 ................N.... 21	GAGGTAGTAGGTTGTANAGTT	5p	1			8		6	8		4			26	4
1 ........G............ 21	GAGGTAGTGGGTTGTATAGTT	5p	1			5		4	4		3	9		25	5
1 .............G....... 21	TGAGGTAGTAGGTGGTATAGT	5p	1			4		3	7	4		7		25	5
1 ....G............... 20	GAGGGAGTAGGTTGTATAGT	5p	1			4		3	5			13		25	4
1 .............C...... 20	AGGTAGTAGGTTGCATAGTT	5p	1			4		6	8			7		25	4
1 ......................T 22	GAGGTAGTAGGTTGTATAGTTTT	5p	1			4		3	7	3		8		25	5
1 .......A............. 21	TGAGGTAATAGGTTGTATAGT	5p	1			4		6	4	6			4	24	5
1 .................C... 21	GAGGTAGTAGGTTGTATCGTT	5p	1			3		3	6			12		24	4
1 ..T.................. 21	GATGTAGTAGGTTGTATAGTT	5p	1	4				4	5	4		7		24	5
1 ............C........ 21	GAGGTAGTAGGTCGTATAGTT	5p	1			5		3		9		7		24	4
2 C.................. 19	CGGTAGTAGGTTGTATAGT	5p	1										24	24	1
1 ...........G.......... 22	GAGGTAGTAGGGTGTATAGTTT	5p	1						4	5	4	10		23	4
2 C................... 20	CGAGGTAGTAGGTTGTATAG	5p	1				10			3	3	7		23	4
1 .......C............. 21	TGAGGTACTAGGTTGTATAGT	5p	1			3		4	4			9	3	23	5
1 ..................A 18	GAGGTAGTAGGTTGTATAA	5p	1				12			5		6		23	3
1 ...................C... 23	TGAGGTAGTAGGTTGTATACTTT	5p	1				15					8		23	2
1 .................A..... 23	TGAGGTAGTAGGTTGTAAAGTTT	5p	1			7		3	5	3		4		22	5
1 ......... ............ 21	TGAGGTAGTGGTTGTATAGTT	5p	1				3	4		4		11		22	4
2 T.................. 19	TAGGTAGTAGGTTGTATAG	5p	1										22	22	1
1 ...............C.. 18	TGAGGTAGTAGGTTGCAT	5p	1				22							22	1
2 C.................... 21	CGGTAGTAGGTTGTATAGTTT	5p	1										21	21	1
1 ..G................. 20	TGGGGTAGTAGGTTGTATAG	5p	1						4	6		10		20	3
2 A.................... 21	AAGGTAGTAGGTTGTATAGTT	5p	1						7			8	4	19	3
1 ...........T....... 19	TGAGGTAGTAGTTTGTATA	5p	1				19							19	1
1 ...A................... 23	TGAAGTAGTAGGTTGTATAGTTT	5p	1			3			5	5		6		19	4
1 .......C............... 23	TGAGGTACTAGGTTGTATAGTTT	5p	1			3		3	5	3		4		18	5
1 .........T............. 23	TGAGGTAGTTGGTTGTATAGTTT	5p	1					3	4	3		5	3	18	5
1 ..............C...... 21	TGAGGTAGTAGGTTCTATAGT	5p	1						8	7		3		18	3
1 ............C.... 17	TGAGGTAGTAGGCTGTA	5p	1				13					5		18	2
1 ......C............. 20	TGAGGTCGTAGGTTGTATAG	5p	1									13	5	18	2
1 ...................A 19	GAGGTAGTAGGTTGTATAGA	5p	1				4		3	3		8		18	4
1 .......G........... 19	GAGGTAGGAGGTTGTATAG	5p	1			3	4			7		3		17	4
1 ...........C........ 20	TGAGGTAGTAGCTTGTATAG	5p	1									11	6	17	2
1 .....C.............. 20	TGAGGCAGTAGGTTGTATAG	5p	1					3	5			9		17	3
1 ..........A....... 18	TGAGGTAGTAAGTTGTAT	5p	1				5			4		8		17	3
1 ..............C........ 23	TGAGGTAGTAGGTTCTATAGTTT	5p	1			3		3		5		6		17	4
1 .......... ......... 19	TGAGGTAGTAGTTGTATAG	5p	1						4	5		4	4	17	4
1 ...............G... 19	TGAGGTAGTAGGTTGGATA	5p	1			5	7		5					17	3
2 C................ 17	CGAGGTAGTAGGTTGTA	5p	1				10					7		17	2
1 ............C....... 20	TGAGGTAGTAGGCTGTATAG	5p	1					3	6			7		16	3
1 .............. ........ 22	TGAGGTAGTAGGTTTATAGTTT	5p	1					10	3				3	16	3
1 ............A........ 21	TTGAGGTAGTAGATTGTATAG	5p	1			4			3			9		16	3
1 ....................G... 24	GTTGAGGTAGTAGGTTGTATGGTT	5p	1	4		6		3		3				16	4
2 A...................... 23	ATGAGGTAGTAGGTTGTATAGTT	5p	1			6			7			3		16	3
1 ....A.................. 23	TGAGATAGTAGGTTGTATAGTTT	5p	1			3		4				6	3	16	4
1 .........T........... 21	GAGGTAGTATGTTGTATAGTT	5p	1			4		4			3	5		16	4
1 ...............C..... 21	GAGGTAGTAGGTTGTCTAGTT	5p	1								4	11		15	2
1 ...............A... 19	TGAGGTAGTAGGTTGAATA	5p	1				15							15	1
1 ...C................. 21	TGACGTAGTAGGTTGTATAGT	5p	1						4			7	4	15	3
1 ..........G......... 20	AGGTAGTAGGGTGTATAGTT	5p	1			4				6		5		15	3
1 .............A......... 23	TGAGGTAGTAGGTAGTATAGTTT	5p	1						8	3		4		15	3
1 ...................G.. 22	GAGGTAGTAGGTTGTATAGGTT	5p	1			6			5	3				14	3
1 ...............T..... 21	GAGGTAGTAGGTTGTTTAGTT	5p	1			3					6	5		14	3
2 G................... 20	GGAGGTAGTAGGTTGTATAG	5p	1					4				6	4	14	3
1 .............C... 17	TGAGGTAGTAGGTCGTA	5p	1				13							13	1
1 .....G............... 21	GAGGTGGTAGGTTGTATAGTT	5p	1						4	4		5		13	3
1 ....C................ 21	TGAGCTAGTAGGTTGTATAGT	5p	1						3	3		7		13	3
1 ..............A...... 21	GAGGTAGTAGGTTGAATAGTT	5p	1					5	4	4				13	3
1 ...................G 19	GAGGTAGTAGGTTGTATAGG	5p	1						5	5		3		13	3
1 ....................G 20	AGGTAGTAGGTTGTATAGTTG	5p	1				3	4	3			3		13	4
1 ..T.................. 21	TGTGGTAGTAGGTTGTATAGT	5p	1						3			6	4	13	3
1 .....C............... 21	GAGGTCGTAGGTTGTATAGTT	5p	1									12		12	1
1 ......T.............. 21	GAGGTATTAGGTTGTATAGTT	5p	1					4		4		4		12	3
2 C.................... 21	CAGGTAGTAGGTTGTATAGTT	5p	1						3	5			4	12	3
1 ............A.......... 23	TTGAGGTAGTAGATTGTATAGTT	5p	1			3		5				4		12	3
1 ...A................. 21	TGAAGTAGTAGGTTGTATAGT	5p	1					3				9		12	2
1 ..C................. 20	TGCGGTAGTAGGTTGTATAG	5p	1									5	7	12	2
1 ......C.......... 17	TGAGGTCGTAGGTTGTA	5p	1									5	7	12	2
1 ...............A.. 18	TGAGGTAGTAGGTTGAAT	5p	1				12							12	1
1 ......T.............. 21	TGAGGTTGTAGGTTGTATAGT	5p	1			4				3		5		12	3
1 .....T............... 21	GAGGTTGTAGGTTGTATAGTT	5p	1									11		11	1
1 ...................A 19	AGGTAGTAGGTTGTATAGTA	5p	1						4			7		11	2
1 ..................C.. 21	GAGGTAGTAGGTTGTATACTT	5p	1					3		4		4		11	3
1 ..............C.. 17	TGAGGTAGTAGGTTCTA	5p	1				11							11	1
1 ............G....... 20	TGAGGTAGTAGGGTGTATAG	5p	1					3				8		11	2
1 .......A............... 23	TGAGGTAATAGGTTGTATAGTTT	5p	1					5		3		3		11	3
1 ....A................ 21	TGAGATAGTAGGTTGTATAGT	5p	1					3				4	4	11	3
1 .....G.............. 20	TGAGGGAGTAGGTTGTATAG	5p	1						4			6		10	2
1 ..T.................... 23	TGTGGTAGTAGGTTGTATAGTTT	5p	1			3		3	4					10	3
1 ......G............ 19	AGGTAGGAGGTTGTATAGT	5p	1			4		6						10	2
1 ................G....... 24	TGAGGTAGTAGGTTGTGTAGTTTA	5p	1						3	7				10	2
1 ...G................ 20	AGGGAGTAGGTTGTATAGTT	5p	1						4			6		10	2
1 ....C.................. 23	TGAGCTAGTAGGTTGTATAGTTT	5p	1					3	4			3		10	3
1 ................G.... 21	GAGGTAGTAGGTTGTAGAGTT	5p	1			4				3		3		10	3
1 .........C.......... 20	AGGTAGTAGCTTGTATAGTT	5p	1								5	5		10	2
1 ...............G... 19	GGTAGTAGGTTGTATGGTT	5p	1							5		4		9	2
1 ......C.............. 21	GAGGTACTAGGTTGTATAGTT	5p	1					3		3		3		9	3
1 ................C... 20	AGGTAGTAGGTTGTATCGTT	5p	1									9		9	1
1 ..................A.. 21	GAGGTAGTAGGTTGTATAATT	5p	1			3				6				9	2
1 ..C.............. 17	TGCGGTAGTAGGTTGTA	5p	1									5	4	9	2
1 ................C 16	TGAGGTAGTAGGTTGTC	5p	1				9							9	1
2 C.................... 21	CTGAGGTAGTAGGTTGTATAG	5p	1					4		5				9	2
1 ................A.... 21	GAGGTAGTAGGTTGTAAAGTT	5p	1					3	3			3		9	3
1 ............G.... 17	TGAGGTAGTAGGGTGTA	5p	1				6					3		9	2
1 ......T................ 23	TGAGGTTGTAGGTTGTATAGTTT	5p	1					3	3			3		9	3
1 .............A...... 20	AGGTAGTAGGTTGAATAGTT	5p	1			4		5						9	2
1 ..........C............ 23	TGAGGTAGTACGTTGTATAGTTT	5p	1						4			5		9	2
1 ....................C... 24	TGAGGTAGTAGGTTGTATAGCTTA	5p	1				9							9	1
1 ......G............. 20	TGAGGTGGTAGGTTGTATAG	5p	1									8		8	1
1 .........T.......... 20	AGGTAGTAGTTTGTATAGTT	5p	1					3				5		8	2
1 ...T................. 21	GAGTTAGTAGGTTGTATAGTT	5p	1					4				4		8	2
1 ................T.. 19	TGAGGTAGTAGGTTGTTTA	5p	1				8							8	1
2 T.................. 19	TGTAGTAGGTTGTATAGTT	5p	1									8		8	1
1 ..........C......... 20	GAGGTAGTAGCTTGTATAGT	5p	1									8		8	1
1 ...............G.... 20	GAGGTAGTAGGTTGTGTAGT	5p	1				5					3		8	2
1 ........T............ 21	GAGGTAGTTGGTTGTATAGTT	5p	1						3			5		8	2
1 ....................G.. 23	GTTGAGGTAGTAGGTTGTATGGT	5p	1			4			3					7	2
2 N...................... 23	NGAGGTAGTAGGTTGTATAGTTT	5p	1									7		7	1
1 ...............A.... 20	TGAGGTAGTAGGTTGAATAG	5p	1				7							7	1
1 ...................C 19	GAGGTAGTAGGTTGTATAGC	5p	1				4			3				7	2
1 .......A............. 21	GAGGTAGAAGGTTGTATAGTT	5p	1							4		3		7	2
1 ........C........... 20	TGAGGTAGCAGGTTGTATAG	5p	1									3	4	7	2
1 ..............A.... 19	TGAGGTAGTAGGTTATATA	5p	1				7							7	1
2 N.................... 21	NGAGGTAGTAGGTTGTATAGT	5p	1									7		7	1
1 ....C............... 20	AGGTCGTAGGTTGTATAGTT	5p	1									7		7	1
1 ...........G........ 20	GAGGTAGTAGGGTGTATAGT	5p	1							4	3			7	2
1 .........C.......... 20	TGAGGTAGTCGGTTGTATAG	5p	1									3	4	7	2
1 .................G 17	GAGGTAGTAGGTTGTATG	5p	1					3				3		6	2
1 .................T 17	GAGGTAGTAGGTTGTATT	5p	1				3		3					6	2
1 ........C........... 20	GAGGTAGTCGGTTGTATAGT	5p	1									6		6	1
1 ..................G...... 25	TGAGGTAGTAGGTTGTATGGTTTAG	5p	1				6							6	1
1 ...............G.. 18	TGAGGTAGTAGGTTGGAT	5p	1			3						3		6	2
1 .......... ........... 21	GAGGTAGTAGTTGTATAGTTT	5p	1								3	3		6	2
1 ............A........ 21	GAGGTAGTAGGTAGTATAGTT	5p	1					6						6	1
1 ..................T 18	GAGGTAGTAGGTTGTATAT	5p	1				6							6	1
1 ..............T..... 20	TGAGGTAGTAGGTTTTATAG	5p	1									6		6	1
1 ..A.................. 21	GAAGTAGTAGGTTGTATAGTT	5p	1									6		6	1
1 ..............C..... 20	TGAGGTAGTAGGTTCTATAG	5p	1									6		6	1
1 .......T............ 20	TGAGGTATTAGGTTGTATAG	5p	1									5		5	1
1 .............C....... 21	GAGGTAGTAGGTTCTATAGTT	5p	1							5				5	1
1 .......N.............. 22	TGAGGTANTAGGTTGTATAGTT	5p	1									5		5	1
1 .............T....... 21	GAGGTAGTAGGTTTTATAGTT	5p	1									5		5	1
1 ....A............... 20	TGAGATAGTAGGTTGTATAG	5p	1									5		5	1
1 ....................A... 24	TGAGGTAGTAGGTTGTATAGATTA	5p	1				5							5	1
1 ..............T.. 17	TGAGGTAGTAGGTTTTA	5p	1				5							5	1
1 ...A................. 21	GAGATAGTAGGTTGTATAGTT	5p	1					5						5	1
1 .............A....... 21	GAGGTAGTAGGTTATATAGTT	5p	1					4						4	1
1 ......................C 22	GAGGTAGTAGGTTGTATAGTTTC	5p	1									4		4	1
1 ...............N...... 22	TGAGGTAGTAGGTTGNATAGTT	5p	1	4										4	1
2 C................. 18	CGAGGTAGTAGGTTGTAT	5p	1									4		4	1
1 ................N... 20	AGGTAGTAGGTTGTATNGTT	5p	1					4						4	1
1 ....................N. 22	TGAGGTAGTAGGTTGTATAGNT	5p	1				4							4	1
2 C................. 18	CTGAGGTAGTAGGTTGTA	5p	1									4		4	1
1 ........C............. 22	GAGGTAGTCGGTTGTATAGTTT	5p	1									4		4	1
1 .................N.... 22	TGAGGTAGTAGGTTGTANAGTT	5p	1		4									4	1
2 T................. 18	TAGGTAGTAGGTTGTATA	5p	1										4	4	1
1 ...............G.... 20	AGGTAGTAGGTTGTAGAGTT	5p	1			4								4	1
1 .............C...... 20	TGAGGTAGTAGGTCGTATAG	5p	1									4		4	1
1 ............A.... 17	TGAGGTAGTAGGATGTA	5p	1									4		4	1
1 ..............C... 18	TGAGGTAGTAGGTTCTAT	5p	1				4							4	1
1 .....A.............. 20	TGAGGAAGTAGGTTGTATAG	5p	1									4		4	1
1 .............A....... 21	GTTGAGGTAGTAGATTGTATA	5p	1									4		4	1
1 .....................A.. 24	TGAGGTAGTAGGTTGTATAGTATA	5p	1				4							4	1
1 .................G..... 23	GAGGTAGTAGGTTGTATGGTTTA	5p	1							4				4	1
2 A................ 17	AGAGGTAGTAGGTTGTA	5p	1									4		4	1
2 T.................. 19	TGGTAGTAGGTTGTATAGT	5p	1							4				4	1
1 ................A.. 19	GAGGTAGTAGGTTGTAAAG	5p	1				4							4	1
1 ..............G..... 20	AGGTAGTAGGTTGTGTAGTT	5p	1							4				4	1
2 T...................... 23	TAGGTAGTAGGTTGTATAGTTTA	5p	1										4	4	1
1 ...........C..... 17	TGAGGTAGTAGCTTGTA	5p	1									4		4	1
1 .............A.... 18	TGAGGTAGTAGGTAGTAT	5p	1				4							4	1
2 G................... 20	GTGAGGTAGTAGGTTGTATA	5p	1			3								3	1
1 ........G............. 22	GAGGTAGTGGGTTGTATAGTTT	5p	1									3		3	1
2 G................... 20	GGGTAGTAGGTTGTATAGTT	5p	1							3				3	1
1 ...............G...... 22	GAGGTAGTAGGTTGTGTAGTTT	5p	1						3					3	1
1 ......N............... 22	TGAGGTNGTAGGTTGTATAGTT	5p	1									3		3	1
1 .................T.. 20	AGGTAGTAGGTTGTATATTT	5p	1					3						3	1
1 ...C................... 23	TGACGTAGTAGGTTGTATAGTTT	5p	1					3						3	1
1 ................C... 20	GAGGTAGTAGGTTGTACAGT	5p	1							3				3	1
1 ..................C 18	GAGGTAGTAGGTTGTATAC	5p	1				3							3	1
1 ........................T 24	TGAGGTAGTAGGTTGTATAGTTTAT	5p	1										3	3	1
1 ..............A..... 20	TGAGGTAGTAGGTTATATAG	5p	1						3					3	1
1 ........... .......... 21	GAGGTAGTAGGTGTATAGTTT	5p	1							3				3	1
2 A................. 18	AGAGGTAGTAGGTTGTAT	5p	1									3		3	1
1 ...A................ 20	TGAAGTAGTAGGTTGTATAG	5p	1										3	3	1
1 ..........C........... 22	GAGGTAGTAGCTTGTATAGTTT	5p	1									3		3	1
1 ............N......... 22	TGAGGTAGTAGGNTGTATAGTT	5p	1										3	3	1
1 .........G.......... 20	TGAGGTAGTGGGTTGTATAG	5p	1									3		3	1
1 .................C.. 20	GAGGTAGTAGGTTGTATCGT	5p	1				3							3	1
1 ............A..... 18	TGAGGTAGTAGGATGTAT	5p	1						3					3	1
1 ................G... 20	GAGGTAGTAGGTTGTAGAGT	5p	1				3							3	1
1 ....C.............. 19	GAGGCAGTAGGTTGTATAG	5p	1									3		3	1
1 ..G.............. 17	TGGGGTAGTAGGTTGTA	5p	1									3		3	1
1 ..............A... 18	TGAGGTAGTAGGTTATAT	5p	1				3							3	1
1 ................C.. 19	TGAGGTAGTAGGTTGTCTA	5p	1				3							3	1
1 ...................A.. 22	GAGGTAGTAGGTTGTATAGATT	5p	1					3						3	1
1 .............G... 17	TGAGGTAGTAGGTGGTA	5p	1				3							3	1
1 .......C.............. 22	GAGGTAGCAGGTTGTATAGTTT	5p	1									3		3	1
1 ....A................. 22	GAGGAAGTAGGTTGTATAGTTT	5p	1									3		3	1
2 T................ 17	TAGGTAGTAGGTTGTAT	5p	1										3	3	1
1 ............G........ 21	GAGGTAGTAGGTGGTATAGTT	5p	1						3					3	1
1 .........A........... 21	GAGGTAGTAAGTTGTATAGTT	5p	1						3					3	1
1 ......... ........... 20	TGAGGTAGTGGTTGTATAGT	5p	1						3					3	1
1 .....................T 21	AGGTAGTAGGTTGTATAGTTTT	5p	1									3		3	1
2 C................. 18	CGGTAGTAGGTTGTATAG	5p	1										3	3	1
1 .............G......... 23	TGAGGTAGTAGGTGGTATAGTTT	5p	1			3								3	1
1 ........A.......... 19	GGTAGTAGATTGTATAGTT	5p	1									3		3	1
1 ......C........... 18	TGAGGTCGTAGGTTGTAT	5p	1									3		3	1
1 .................T.... 22	GAGGTAGTAGGTTGTATTGTTT	5p	1								3			3	1
1 ..G............... 18	TGGGGTAGTAGGTTGTAT	5p	1									3		3	1
1 .............C.... 18	TGAGGTAGTAGGTCGTAT	5p	1				3							3	1
1 ..................A 18	AGGTAGTAGGTTGTATAGA	5p	1				3							3	1
1 ..............C.... 19	GAGGTAGTAGGTTGCATAG	5p	1				3							3	1
1 ..........T......... 20	GAGGTAGTAGTTTGTATAGT	5p	1							3				3	1
cluster No. 3
265 GCACGGCGGACCCTCCCGCAGCCCGGGCGCCCGCGGGGTGAGGTAGTAGGTTGTGTGGTTTCAGGGCAGTGATGTTGCCCCCTCGGAAGATAACTATACAACCTACTGCCTTCCCTGAG 147 new hairpin
1 ............................................ ......A................................ 83 mml-let-7b
1 ...........................................C. ......C................................. 85 rno-let-7b
1 ..A.......................................... ......C................................. 85 mmu-let-7b
2 G..................................T......T.......A..A................................. 88 mdo-let-7b
1 ........................................... ......A................................ 82 ptr-let-7b
1 ...A............................G......T.......A..A...............G.............. 82 oan-let-7b
1 ............................................ ....................................... 83 hsa-let-7b
4 GGG..A...............C.......A..G.................................... 69 cfa-let-7b
1 .................................T............................................... 81 bta-let-7b
1 ...................... 22	TGAGGTAGTAGGTTGTGTGGTT	5p	0	386	433	42667	9514	60601	121322	79817	3525	144194	57504	519963	10
1 ....................... 23	TGAGGTAGTAGGTTGTGTGGTTT	5p	0	51	63	11178	2790	19012	45100	26882	970	46886	21636	174568	10
1 ..................... 21	TGAGGTAGTAGGTTGTGTGGT	5p	0	15	15	3033	4758	6240	13554	9449	334	17578	8097	63073	10
1 .................... 20	TGAGGTAGTAGGTTGTGTGG	5p	0	4		413	2796	975	2305	1755	60	3058	1659	13025	9
1 ..................... 21	GAGGTAGTAGGTTGTGTGGTT	5p	0	22	7	1116	139	1761	1793	2147	760	4420	45	12210	10
1 ................. 17	TGAGGTAGTAGGTTGTG	5p	0		6	440	363	580	908	1278	88	2315	1021	6999	9
1 ...................... 22	GAGGTAGTAGGTTGTGTGGTTT	5p	0			370	50	581	793	798	322	1844	22	4780	8
1 .................... 20	GAGGTAGTAGGTTGTGTGGT	5p	0			103	84	173	240	301	95	501		1497	7
1 .................... 20	AGGTAGTAGGTTGTGTGGTT	5p	0	5		109	15	159	188	227	92	546		1341	8
1 ................... 19	TGAGGTAGTAGGTTGTGTG	5p	0			56	168	84	210	176	7	327	213	1241	8
1 ..................... 21	AGGTAGTAGGTTGTGTGGTTT	5p	0			45	5	64	84	91	26	232		547	7
1 ........................ 24	TGAGGTAGTAGGTTGTGTGGTTTC	5p	0			30	46	24	89	63	4	126	44	426	8
1 .................. 18	TGAGGTAGTAGGTTGTGT	5p	0			23	40	47	58	81	6	107	45	407	8
1 ................... 19	GAGGTAGTAGGTTGTGTGG	5p	0			14	44	31	36	47	9	93		274	7
1 ................ 16	GAGGTAGTAGGTTGTG	5p	0			15	9	16	23	64	25	94		246	7
1 ................... 19	AGGTAGTAGGTTGTGTGGT	5p	0			14	8	22	20	25	8	61		158	7
1 ................ 16	TGAGGTAGTAGGTTGT	5p	0			7	44	11	6	11		27	9	115	7
1 ......................... 25	TGAGGTAGTAGGTTGTGTGGTTTCA	5p	0				30					9		39	2
1 .................. 18	AGGTAGTAGGTTGTGTGG	5p	0			4	3		3	9		15		34	5
1 .................. 18	GAGGTAGTAGGTTGTGTG	5p	0			3		3	4	6		5		21	5
1 ....................... 23	GTGAGGTAGTAGGTTGTGTGGTT	5p	0							3		4		7	2
1 ................... 19	GGTAGTAGGTTGTGTGGTT	5p	0									5		5	1
1 ................. 17	GAGGTAGTAGGTTGTGT	5p	0									5		5	1
1 ....................... 23	GAGGTAGTAGGTTGTGTGGTTTC	5p	0									3		3	1
1 .................... 20	GGTAGTAGGTTGTGTGGTTT	5p	0					3						3	1
1 ................A..... 22	TGAGGTAGTAGGTTGTATGGTT	5p	1	8444	1913	103258	13200	102651	132853	105918	6827	120975	51853	647892	10
1 ......................A 22	TGAGGTAGTAGGTTGTGTGGTTA	5p	1	44	33	7032	2285	12163	22978	16462	580	31004	12200	104781	10
1 ................A.... 21	TGAGGTAGTAGGTTGTATGGT	5p	1	290	52	5365	2558	7389	9928	9501	460	11014	5338	51895	10
1 ................A...... 23	TGAGGTAGTAGGTTGTATGGTTT	5p	1	308	68	5655	754	5652	8502	6465	388	7964	3623	39379	10
1 ...............A..... 21	GAGGTAGTAGGTTGTATGGTT	5p	1	523	48	3686	266	3696	2816	3714	1480	4791	54	21074	10
1 .....................A 21	TGAGGTAGTAGGTTGTGTGGTA	5p	1	4	6	727	1845	1642	3764	2688	92	5294	2080	18142	10
1 .......................T 23	TGAGGTAGTAGGTTGTGTGGTTTT	5p	1	4	4	1166	249	1659	4122	2439	138	4192	2032	16005	10
1 ..................A... 22	TGAGGTAGTAGGTTGTGTAGTT	5p	1	25	136	2151	231	1710	2855	2568	152	1557	160	11545	10
1 ................A... 20	TGAGGTAGTAGGTTGTATGG	5p	1	37	5	481	1526	692	939	1023	44	1207	647	6601	10
1 .................C.... 22	TGAGGTAGTAGGTTGTGCGGTT	5p	1	8	15	1054	61	688	1257	1036	29	673	69	4890	10
1 .......................A 23	TGAGGTAGTAGGTTGTGTGGTTTA	5p	1			322	131	510	971	755	31	1202	488	4410	8
1 ......................G 22	TGAGGTAGTAGGTTGTGTGGTTG	5p	1			210	181	403	842	591	20	1504	630	4381	8
1 .....................A 21	GAGGTAGTAGGTTGTGTGGTTA	5p	1			179	28	344	358	499	175	1118	9	2710	8
1 .................G.... 22	TGAGGTAGTAGGTTGTGGGGTT	5p	1	5	12	478	28	329	705	397	10	386	81	2431	10
1 ...............G...... 22	TGAGGTAGTAGGTTGGGTGGTT	5p	1	13	28	491	34	337	778	242	13	338	98	2372	10
1 ...................T.. 22	TGAGGTAGTAGGTTGTGTGTTT	5p	1		6	169	133	321	385	345	28	663	310	2360	9
1 ............A......... 22	TGAGGTAGTAGGATGTGTGGTT	5p	1		4	260	9	481	591	477	9	338	43	2212	9
1 ........G............. 22	TGAGGTAGGAGGTTGTGTGGTT	5p	1	13	13	505	20	194	576	180	9	602	37	2149	10
1 ..............A..... 20	AGGTAGTAGGTTGTATGGTT	5p	1	26		353	33	364	268	313	168	561		2086	8
1 ....................A 20	TGAGGTAGTAGGTTGTGTGGA	5p	1			30	886	96	240	173	4	398	165	1992	8
1 ..................T... 22	TGAGGTAGTAGGTTGTGTTGTT	5p	1	14	18	405	100	254	289	289	47	324	68	1808	10
1 ...............A.... 20	GAGGTAGTAGGTTGTATGGT	5p	1	14		241	63	308	226	346	127	467	8	1800	9
1 ......................C 22	TGAGGTAGTAGGTTGTGTGGTTC	5p	1			91	269	141	330	210	9	371	310	1731	8
1 ....................G.. 23	TGAGGTAGTAGGTTGTGTGGGTT	5p	1			204	26	191	471	261	5	285	91	1534	8
1 ......C............... 22	TGAGGTCGTAGGTTGTGTGGTT	5p	1			22	4	12	23	22		894	517	1494	7
2 T.................... 21	TAGGTAGTAGGTTGTGTGGTT	5p	1			5		14	10	11		62	1385	1487	6
1 ................C..... 22	TGAGGTAGTAGGTTGTCTGGTT	5p	1	3	8	172	46	172	145	156	14	496	268	1480	10
1 ..G................... 22	TGGGGTAGTAGGTTGTGTGGTT	5p	1		3	45	9	58	130	76	4	1011	69	1405	9
1 ...............A...... 22	GAGGTAGTAGGTTGTATGGTTT	5p	1	17		235	22	191	178	230	103	352		1328	8
1 .....................G 21	TGAGGTAGTAGGTTGTGTGGTG	5p	1		10	173	236	116	264	119	7	270	109	1304	9
2 A..................... 22	AGAGGTAGTAGGTTGTGTGGTT	5p	1		3	48	51	49	74	75	9	810	103	1222	9
1 ............C......... 22	TGAGGTAGTAGGCTGTGTGGTT	5p	1			111	19	112	283	116	5	439	62	1147	8
2 C..................... 22	CGAGGTAGTAGGTTGTGTGGTT	5p	1	4	3	70	71	74	123	117	29	537	101	1129	10
1 ...................A 19	TGAGGTAGTAGGTTGTGTGA	5p	1			19	408	38	134	131		231	133	1094	7
1 ................T..... 22	TGAGGTAGTAGGTTGTTTGGTT	5p	1	18	9	106	75	146	144	139	25	238	170	1070	10
1 ..................A.... 23	TGAGGTAGTAGGTTGTGTAGTTT	5p	1		8	149	44	149	268	297	8	114	23	1060	9
1 .....................C 21	TGAGGTAGTAGGTTGTGTGGTC	5p	1			48	489	47	76	71		161	68	960	7
1 ............ ......... 21	TGAGGTAGTAGGTGTGTGGTT	5p	1			44	13	132	72	139	18	296	193	907	8
1 ...........T.......... 22	TGAGGTAGTAGTTTGTGTGGTT	5p	1			35	17	95	108	93	15	360	169	892	8
1 .......... ........... 21	TGAGGTAGTAGTTGTGTGGTT	5p	1		3	44	15	127	82	127	11	272	196	877	9
1 .................C..... 23	TGAGGTAGTAGGTTGTGCGGTTT	5p	1		5	111	10	125	228	214	4	128	23	848	9
2 C...................... 23	CTGAGGTAGTAGGTTGTGTGGTT	5p	1			65	7	94	173	153	17	254	66	829	8
1 ......G............... 22	TGAGGTGGTAGGTTGTGTGGTT	5p	1			31	5	28	55	44	6	597	43	809	8
1 ............G......... 22	TGAGGTAGTAGGGTGTGTGGTT	5p	1			88	13	94	143	107	8	273	69	795	8
1 ..C................... 22	TGCGGTAGTAGGTTGTGTGGTT	5p	1			23	8	24	24	25		336	312	752	7
1 .................G..... 23	TGAGGTAGTAGGTTGTGGGGTTT	5p	1		3	104	4	85	241	146	4	113	25	725	9
1 ...............G....... 23	TGAGGTAGTAGGTTGGGTGGTTT	5p	1		6	125	10	86	261	85		117	29	719	8
2 T..................... 22	TAGGTAGTAGGTTGTGTGGTTT	5p	1							6		34	672	712	3
1 ...............C...... 22	TGAGGTAGTAGGTTGCGTGGTT	5p	1		11	80	14	89	163	126	4	176	48	711	9
2 G..................... 22	GGAGGTAGTAGGTTGTGTGGTT	5p	1			56	4	39	52	33	4	316	199	703	8
1 ..................A.. 21	TGAGGTAGTAGGTTGTGTAGT	5p	1		5	69	166	74	110	145	6	103	11	689	9
1 .....G................ 22	TGAGGGAGTAGGTTGTGTGGTT	5p	1		3	73	18	59	110	119	14	243	20	659	9
1 ........C............. 22	TGAGGTAGCAGGTTGTGTGGTT	5p	1		5	42	10	40	71	51		355	80	654	8
1 ............A.......... 23	TGAGGTAGTAGGATGTGTGGTTT	5p	1			57	6	153	190	128		97	10	641	7
1 ........A............. 22	TGAGGTAGAAGGTTGTGTGGTT	5p	1		12	27		42	78	126		301	51	637	7
1 ................N..... 22	TGAGGTAGTAGGTTGTNTGGTT	5p	1		4	104		150	286	82				626	5
1 ...........A.......... 22	TGAGGTAGTAGATTGTGTGGTT	5p	1		5	70		105	111	90	3	156	45	585	8
1 ...................T 19	TGAGGTAGTAGGTTGTGTGT	5p	1			30	112	54	76	73	7	147	80	579	8
1 .....C................ 22	TGAGGCAGTAGGTTGTGTGGTT	5p	1		5	28	15	40	80	88	5	253	63	577	9
1 ...T.................. 22	TGATGTAGTAGGTTGTGTGGTT	5p	1			29	13	47	71	70	3	183	155	571	8
1 ........G.............. 23	TGAGGTAGGAGGTTGTGTGGTTT	5p	1		3	111	4	58	154	43		179	14	566	8
1 .........C............ 22	TGAGGTAGTCGGTTGTGTGGTT	5p	1			12	4	11	29	20	6	207	252	541	8
1 ......C................ 23	TGAGGTCGTAGGTTGTGTGGTTT	5p	1			3			12	6		286	201	508	5
1 .......T.............. 22	TGAGGTATTAGGTTGTGTGGTT	5p	1		3	26	15	40	52	59	4	214	74	487	9
1 ....................A 20	GAGGTAGTAGGTTGTGTGGTA	5p	1			22	33	57	66	76	33	176	3	466	8
1 ......................T 22	GAGGTAGTAGGTTGTGTGGTTTT	5p	1			41	6	56	70	74	30	185	3	465	8
1 ....................A.. 23	TGAGGTAGTAGGTTGTGTGGATT	5p	1			29	81	53	98	120	4	47	32	464	8
1 ....................G 20	TGAGGTAGTAGGTTGTGTGGG	5p	1			52	99	48	86	74	3	50	23	435	8
1 .................G... 21	TGAGGTAGTAGGTTGTGGGGT	5p	1			41	52	59	104	96		59	20	431	7
1 ............ .......... 22	TGAGGTAGTAGGTGTGTGGTTT	5p	1			16	3	45	45	61	4	133	101	408	8
1 ................A.. 19	TGAGGTAGTAGGTTGTATG	5p	1			27	89	37	55	59	3	84	47	401	8
2 C...................... 23	CGAGGTAGTAGGTTGTGTGGTTT	5p	1			28	19	20	47	43	12	177	53	399	8
1 ...................T... 23	TGAGGTAGTAGGTTGTGTGTTTT	5p	1			17	33	43	50	62	4	132	58	399	8
1 ....T................. 22	TGAGTTAGTAGGTTGTGTGGTT	5p	1			18	5	35	43	68	3	164	62	398	8
1 ....................C 20	TGAGGTAGTAGGTTGTGTGGC	5p	1			13	252	18	33	26		27	21	390	7
1 ..............T....... 22	TGAGGTAGTAGGTTTTGTGGTT	5p	1			30	7	42	45	55	8	152	47	386	8
1 ..G.................... 23	TGGGGTAGTAGGTTGTGTGGTTT	5p	1			9		26	44	27		255	19	380	6
1 ...................A.. 22	TGAGGTAGTAGGTTGTGTGATT	5p	1			11	210	17	30	28		54	24	374	7
2 A...................... 23	AGAGGTAGTAGGTTGTGTGGTTT	5p	1			12	11	19	16	26		236	51	371	7
1 .........G............ 22	TGAGGTAGTGGGTTGTGTGGTT	5p	1			25	12	29	62	36	4	158	45	371	8
1 ..........T........... 22	TGAGGTAGTATGTTGTGTGGTT	5p	1			31		33	48	33	3	136	86	370	7
1 ........... ........... 22	TGAGGTAGTAGTTGTGTGGTTT	5p	1			12	11	56	30	41	4	130	82	366	8
1 ............C.......... 23	TGAGGTAGTAGGCTGTGTGGTTT	5p	1			23	9	27	84	46		158	18	365	7
1 ....................C.. 23	TGAGGTAGTAGGTTGTGTGGCTT	5p	1			30	26	40	99	55		67	42	359	7
1 .............C........ 22	TGAGGTAGTAGGTCGTGTGGTT	5p	1			31	8	41	69	48		113	40	350	7
1 ............G.......... 23	TGAGGTAGTAGGGTGTGTGGTTT	5p	1			27	5	35	55	48	3	142	35	350	8
1 .......................G 23	TGAGGTAGTAGGTTGTGTGGTTTG	5p	1			7	38	23	79	52	3	102	46	350	8
1 ...........T........... 23	TGAGGTAGTAGTTTGTGTGGTTT	5p	1			19	5	31	43	36		132	79	345	7
1 .................C... 21	TGAGGTAGTAGGTTGTGCGGT	5p	1			32	87	27	58	71		48	8	331	7
1 ....................A 20	AGGTAGTAGGTTGTGTGGTTA	5p	1			18	5	44	36	60	10	156		329	7
1 ...A................... 23	TGAAGTAGTAGGTTGTGTGGTTT	5p	1					7	13	11		272	9	312	5
1 .................A.... 22	TGAGGTAGTAGGTTGTGAGGTT	5p	1			18	13	54	72	89		45	21	312	7
1 ..................T.... 23	TGAGGTAGTAGGTTGTGTTGTTT	5p	1			39		28	63	54		89	30	303	6
1 ..................C... 22	TGAGGTAGTAGGTTGTGTCGTT	5p	1		3	31	49	37	42	43		75	22	302	8
1 ..............A....... 22	TGAGGTAGTAGGTTATGTGGTT	5p	1			19	7	33	71	52		73	28	283	7
1 ..........A........... 22	TGAGGTAGTAAGTTGTGTGGTT	5p	1			20	5	35	37	58		81	45	281	7
1 ...............A...... 22	TGAGGTAGTAGGTTGAGTGGTT	5p	1			38	4	39	70	59		49	17	276	7
2 C....................... 24	CTGAGGTAGTAGGTTGTGTGGTTT	5p	1			31	4	36	59	45	6	59	29	269	8
1 ................T...... 23	TGAGGTAGTAGGTTGTTTGGTTT	5p	1			15	4	28	36	41		96	49	269	7
2 G...................... 23	GGAGGTAGTAGGTTGTGTGGTTT	5p	1			13		14	21	11		101	87	247	6
1 ..C.................... 23	TGCGGTAGTAGGTTGTGTGGTTT	5p	1			4		8	8	7		124	91	242	6
1 .....G................. 23	TGAGGGAGTAGGTTGTGTGGTTT	5p	1			16	3	20	39	45	6	104	9	242	8
1 ...............G..... 21	TGAGGTAGTAGGTTGGGTGGT	5p	1			36	15	29	78	34		41	9	242	7
1 .....A................ 22	TGAGGAAGTAGGTTGTGTGGTT	5p	1	4	7	16	3	26	27	41		94	23	241	9
1 ...A.................. 22	TGAAGTAGTAGGTTGTGTGGTT	5p	1			16	7	26	37	31		92	31	240	7
1 ......C.............. 21	TGAGGTCGTAGGTTGTGTGGT	5p	1				4		4			125	103	236	4
1 .....C................. 23	TGAGGCAGTAGGTTGTGTGGTTT	5p	1			9	6	13	34	42	3	91	29	227	8
1 ......G................ 23	TGAGGTGGTAGGTTGTGTGGTTT	5p	1			7		14	17	22		140	21	221	6
1 ...................C.. 22	TGAGGTAGTAGGTTGTGTGCTT	5p	1			10	85	19	22	19		44	20	219	7
2 C................... 20	CGGTAGTAGGTTGTGTGGTT	5p	1										219	219	1
1 ..............G...... 21	GAGGTAGTAGGTTGGGTGGTT	5p	1	3		29		22	34	19	24	84		215	7
1 ............A........ 21	TGAGGTAGTAGGATGTGTGGT	5p	1			18	7	50	51	42		36	6	210	7
1 ..........C........... 22	TGAGGTAGTACGTTGTGTGGTT	5p	1			8	3	20	21	13	3	106	29	203	8
2 T................... 20	TAGGTAGTAGGTTGTGTGGT	5p	1					3	3	3		6	185	200	5
1 .........C............. 23	TGAGGTAGTCGGTTGTGTGGTTT	5p	1			5	3	9	10	9		56	107	199	7
1 ...............C....... 23	TGAGGTAGTAGGTTGCGTGGTTT	5p	1			19	7	17	43	39		49	19	193	7
1 .......C.............. 22	TGAGGTACTAGGTTGTGTGGTT	5p	1			9		32	24	30		69	25	189	6
1 ...T................... 23	TGATGTAGTAGGTTGTGTGGTTT	5p	1			10		26	24	22		65	41	188	6
1 .............A........ 22	TGAGGTAGTAGGTAGTGTGGTT	5p	1		3	12		16	42	49		52	13	187	7
1 ........C.............. 23	TGAGGTAGCAGGTTGTGTGGTTT	5p	1			11	3	9	28	13		90	30	184	7
1 ..............T........ 23	TGAGGTAGTAGGTTTTGTGGTTT	5p	1			15		13	17	28	3	71	27	174	7
2 A.................... 21	AGAGGTAGTAGGTTGTGTGGT	5p	1			6	25	5	4	6		103	22	171	7
1 ..............A.... 19	AGGTAGTAGGTTGTATGGT	5p	1			25	7	27	21	27	13	50		170	7
1 ..............C....... 22	TGAGGTAGTAGGTTCTGTGGTT	5p	1			11	9	23	19	29		58	21	170	7
1 ....G................ 21	GAGGGAGTAGGTTGTGTGGTT	5p	1	7		35		9	21	11	5	78		166	7
1 ...........A........... 23	TGAGGTAGTAGATTGTGTGGTTT	5p	1			19		30	32	21		48	15	165	6
1 ...............A... 19	GAGGTAGTAGGTTGTATGG	5p	1			13	27	27	19	21	14	43		164	7
1 .......T............... 23	TGAGGTATTAGGTTGTGTGGTTT	5p	1			8		13	25	24		67	23	160	6
1 ....A................. 22	TGAGATAGTAGGTTGTGTGGTT	5p	1			11		14	33	26		56	19	159	6
1 ................C.... 21	TGAGGTAGTAGGTTGTCTGGT	5p	1			9	35	12	15	23		41	23	158	7
1 ................C...... 23	TGAGGTAGTAGGTTGTCTGGTTT	5p	1			16	6	12	28	13	3	60	20	158	8
1 ....T.................. 23	TGAGTTAGTAGGTTGTGTGGTTT	5p	1			10		14	25	19		59	31	158	6
1 ..........T............ 23	TGAGGTAGTATGTTGTGTGGTTT	5p	1			8		15	22	21		53	36	155	6
1 ...C.................. 22	TGACGTAGTAGGTTGTGTGGTT	5p	1			6		18	25	17		51	30	147	6
1 .............G........ 22	TGAGGTAGTAGGTGGTGTGGTT	5p	1			17	4	19	24	23		46	14	147	7
1 ....C................. 22	TGAGCTAGTAGGTTGTGTGGTT	5p	1			9		14	15	17		70	21	146	6
1 ..................T.. 21	TGAGGTAGTAGGTTGTGTTGT	5p	1			9	39	15	15	28	3	23	12	144	8
1 ........G............ 21	TGAGGTAGGAGGTTGTGTGGT	5p	1			21	5	14	29	9		59	7	144	7
1 ..............A...... 21	AGGTAGTAGGTTGTATGGTTT	5p	1			29		22	10	27	13	41		142	6
1 ............C........ 21	TGAGGTAGTAGGCTGTGTGGT	5p	1			6	10	16	20	26		53	6	137	7
1 ..................T 18	TGAGGTAGTAGGTTGTGTT	5p	1			6	15	17	14	21		34	29	136	7
1 .................G.. 20	TGAGGTAGTAGGTTGTGGGG	5p	1			11	32	7	26	21		29	8	134	7
1 .......A.............. 22	TGAGGTAATAGGTTGTGTGGTT	5p	1			8		22	33	21		41	8	133	6
1 ...........C.......... 22	TGAGGTAGTAGCTTGTGTGGTT	5p	1			8	4	17	11	16		55	22	133	7
2 C.................... 21	CGAGGTAGTAGGTTGTGTGGT	5p	1			4	30	12	14	12		49	11	132	7
1 ...........T......... 21	TGAGGTAGTAGTTTGTGTGGT	5p	1			4	4	14	11	23		43	32	131	7
1 .........G............. 23	TGAGGTAGTGGGTTGTGTGGTTT	5p	1			4		13	25	15		57	14	128	6
1 ......................A 22	GAGGTAGTAGGTTGTGTGGTTTA	5p	1			11	5	18	22	21	8	39	3	127	8
1 ..........A............ 23	TGAGGTAGTAAGTTGTGTGGTTT	5p	1			11		15	18	25		36	21	126	6
1 .............C......... 23	TGAGGTAGTAGGTCGTGTGGTTT	5p	1			7		10	28	18		49	13	125	6
1 ........A.............. 23	TGAGGTAGAAGGTTGTGTGGTTT	5p	1			3		5	21	19		58	15	121	6
1 ...........G......... 21	GAGGTAGTAGGGTGTGTGGTT	5p	1			3		4	5	22	23	64		121	6
1 .........T............ 22	TGAGGTAGTTGGTTGTGTGGTT	5p	1			8	6	12	25	7		48	14	120	7
1 ..G.................. 21	TGGGGTAGTAGGTTGTGTGGT	5p	1			7	6	7	6	6	3	69	16	120	8
1 ................T.... 21	TGAGGTAGTAGGTTGTTTGGT	5p	1			4	25	13	19	9		26	22	118	7
2 C.................... 21	CGGTAGTAGGTTGTGTGGTTT	5p	1										117	117	1
1 .................A..... 23	TGAGGTAGTAGGTTGTGAGGTTT	5p	1			5		10	28	35		32	6	116	6
1 ......T............... 22	TGAGGTTGTAGGTTGTGTGGTT	5p	1			8		7	16	9		62	13	115	6
2 C..................... 22	CTGAGGTAGTAGGTTGTGTGGT	5p	1			7	3	14	23	24	3	29	11	114	8
1 .....................G 21	GAGGTAGTAGGTTGTGTGGTTG	5p	1			13	5	9	9	15	9	52		112	7
1 .................A... 21	TGAGGTAGTAGGTTGTGAGGT	5p	1			5	53	7	20	14		12		111	6
1 ..T................... 22	TGTGGTAGTAGGTTGTGTGGTT	5p	1			7		7	23	10		53	8	108	6
1 .................C.. 20	TGAGGTAGTAGGTTGTGCGG	5p	1			5	69	5	6	13		8		106	6
1 ...................A... 23	TGAGGTAGTAGGTTGTGTGATTT	5p	1				56		9	11		19	10	105	5
1 ..................C.... 23	TGAGGTAGTAGGTTGTGTCGTTT	5p	1			4	12	12	15	21		31	9	104	7
1 .....G............... 21	TGAGGGAGTAGGTTGTGTGGT	5p	1			9	12	7	13	15	4	44		104	7
1 .........C........... 21	TGAGGTAGTCGGTTGTGTGGT	5p	1				4	7	7	4		32	49	103	6
1 ...............A....... 23	TGAGGTAGTAGGTTGAGTGGTTT	5p	1			9		11	33	22		21	6	102	6
1 ..............A........ 23	TGAGGTAGTAGGTTATGTGGTTT	5p	1			7		13	18	19		28	15	100	6
1 ..................A 18	TGAGGTAGTAGGTTGTGTA	5p	1				28	7	10	12		31	11	99	6
1 ..C.................. 21	TGCGGTAGTAGGTTGTGTGGT	5p	1				5					51	39	95	3
1 ............G........ 21	TGAGGTAGTAGGGTGTGTGGT	5p	1			7		16	18	19		29	5	94	6
1 .......... .......... 20	TGAGGTAGTAGTTGTGTGGT	5p	1			5		12	7	12		30	23	89	6
1 .....A................. 23	TGAGGAAGTAGGTTGTGTGGTTT	5p	1			5		7	11	17	4	33	12	89	7
2 G.................... 21	GGAGGTAGTAGGTTGTGTGGT	5p	1			7		5		5		41	28	86	5
1 ...........T..... 17	TGAGGTAGTAGTTTGTG	5p	1			4	22	5	6	12		26	10	85	7
1 .................A 17	TGAGGTAGTAGGTTGTGA	5p	1				67		3	3		7	4	84	5
1 ................N...... 23	TGAGGTAGTAGGTTGTNTGGTTT	5p	1			10		19	40	14				83	4
1 ...............C..... 21	TGAGGTAGTAGGTTGCGTGGT	5p	1			6	10	4	18	10		25	9	82	7
1 ................A....... 24	TGAGGTAGTAGGTTGTATGGTTTC	5p	1			9	16	6	20	8		16	7	82	7
1 .....C............... 21	TGAGGCAGTAGGTTGTGTGGT	5p	1			3	8	4	8	13		30	10	76	7
1 ..................T.. 21	GAGGTAGTAGGTTGTGTGTTT	5p	1			3		7	9	13	11	33		76	6
1 ...................C 19	TGAGGTAGTAGGTTGTGTGC	5p	1				66			3		3	3	75	4
1 ...................C... 23	TGAGGTAGTAGGTTGTGTGCTTT	5p	1				48			8		13	6	75	4
1 ....G................. 22	GAGGGAGTAGGTTGTGTGGTTT	5p	1			17		7	9	7		34		74	5
1 .......G............. 21	GAGGTAGGAGGTTGTGTGGTT	5p	1			7		6		5	11	44		73	5
1 ...........G.......... 22	GAGGTAGTAGGGTGTGTGGTTT	5p	1					4	4	9	15	40		72	5
1 ..............G....... 22	GAGGTAGTAGGTTGGGTGGTTT	5p	1			7		7	8	11	8	30		71	6
1 ...................G.. 22	GAGGTAGTAGGTTGTGTGGGTT	5p	1			9		14	17	7	7	17		71	6
1 ...T................. 21	TGATGTAGTAGGTTGTGTGGT	5p	1			4		11	10	12		17	15	69	6
1 ........C............ 21	TGAGGTAGCAGGTTGTGTGGT	5p	1				5	5	8	5		32	12	67	6
1 ...........A......... 21	TGAGGTAGTAGATTGTGTGGT	5p	1			7		7	13	12		19	7	65	6
1 ....A.................. 23	TGAGATAGTAGGTTGTGTGGTTT	5p	1						12	12		33	8	65	4
1 .......T............. 21	TGAGGTATTAGGTTGTGTGGT	5p	1					9	7	11		27	10	64	5
1 .....................T 21	AGGTAGTAGGTTGTGTGGTTTT	5p	1			4		7	6	9	3	33		62	6
1 ......G.............. 21	TGAGGTGGTAGGTTGTGTGGT	5p	1						4	8		42	7	61	4
1 .............C....... 21	TGAGGTAGTAGGTCGTGTGGT	5p	1				6	5	9	11		22	8	61	6
1 ..........T.......... 21	TGAGGTAGTATGTTGTGTGGT	5p	1			3		5	8	6		26	13	61	6
1 .......C............... 23	TGAGGTACTAGGTTGTGTGGTTT	5p	1				3	7	9	9		25	6	59	6
1 .............A......... 23	TGAGGTAGTAGGTAGTGTGGTTT	5p	1			4		9	10	15		15	6	59	6
2 N..................... 22	NGAGGTAGTAGGTTGTGTGGTT	5p	1									58		58	1
1 ................T... 20	TGAGGTAGTAGGTTGTTTGG	5p	1				39		4	4		8	3	58	5
1 .................A... 21	GAGGTAGTAGGTTGTGTAGTT	5p	1	7		11	4	3	11	4	5	13		58	8
1 ........C............ 21	GAGGTAGTCGGTTGTGTGGTT	5p	1						3	3	3	47		56	4
1 ..........C............ 23	TGAGGTAGTACGTTGTGTGGTTT	5p	1			3		6	3	9		29	6	56	6
1 .................A.. 20	TGAGGTAGTAGGTTGTGAGG	5p	1				48			3			4	55	3
1 ...............G.... 20	TGAGGTAGTAGGTTGGGTGG	5p	1			4	18	4	11	7		7	3	54	7
1 .........T............. 23	TGAGGTAGTTGGTTGTGTGGTTT	5p	1			3			11	5		23	11	53	5
1 ........A............ 21	TGAGGTAGAAGGTTGTGTGGT	5p	1					6	8	13		21	3	51	5
1 ....C.................. 23	TGAGCTAGTAGGTTGTGTGGTTT	5p	1			5		3	8	5		21	9	51	6
1 ..............C........ 23	TGAGGTAGTAGGTTCTGTGGTTT	5p	1				6	9	6	8		16	5	50	6
1 ..............T...... 21	TGAGGTAGTAGGTTTTGTGGT	5p	1			3	4	5	4	9		16	8	49	7
1 .........G........... 21	TGAGGTAGTGGGTTGTGTGGT	5p	1						5	11		24	9	49	4
1 ..T.................... 23	TGTGGTAGTAGGTTGTGTGGTTT	5p	1					5	7	3		25	6	46	5
2 C................... 20	CGAGGTAGTAGGTTGTGTGG	5p	1				27					19		46	2
1 ............A....... 20	TGAGGTAGTAGGATGTGTGG	5p	1				6	5	13	13		7		44	5
1 ...................A 19	AGGTAGTAGGTTGTGTGGTA	5p	1					4	8	4	3	25		44	5
1 ..............A.. 17	TGAGGTAGTAGGTTATG	5p	1				41					3		44	2
1 ................N.... 21	TGAGGTAGTAGGTTGTNTGGT	5p	1			6		8	25	5				44	4
1 .............G...... 20	AGGTAGTAGGTTGGGTGGTT	5p	1			9		8	8	5		14		44	5
1 ...............C.... 20	TGAGGTAGTAGGTTGCGTGG	5p	1			3	25		4			7	4	43	5
1 ..................C.. 21	TGAGGTAGTAGGTTGTGTCGT	5p	1				13		7	7		8	7	42	5
1 ...............A..... 21	TGAGGTAGTAGGTTGAGTGGT	5p	1			6		8	12	8		7		41	5
1 .....................C 21	GAGGTAGTAGGTTGTGTGGTTC	5p	1			4	5	4	3	6	5	13		40	7
1 ..............A...... 21	TGAGGTAGTAGGTTATGTGGT	5p	1					8	11	4		10	6	39	5
1 ...........C........... 23	TGAGGTAGTAGCTTGTGTGGTTT	5p	1					5	6			21	7	39	4
2 T.................. 19	TAGGTAGTAGGTTGTGTGG	5p	1										38	38	1
1 ................C.... 21	GAGGTAGTAGGTTGTGCGGTT	5p	1					5	4	8	3	18		38	5
1 ....................G 20	GAGGTAGTAGGTTGTGTGGTG	5p	1			3	3	6		6	5	15		38	6
1 .....A............... 21	TGAGGAAGTAGGTTGTGTGGT	5p	1					3	7	10		13	5	38	5
2 A................... 20	AGAGGTAGTAGGTTGTGTGG	5p	1				15					17	5	37	3
1 .......A............... 23	TGAGGTAATAGGTTGTGTGGTTT	5p	1					3	12	5		14	3	37	5
2 T................... 20	TGGTAGTAGGTTGTGTGGTT	5p	1					10		8		14	5	37	4
1 ....T................ 21	TGAGTTAGTAGGTTGTGTGGT	5p	1					5		5		17	9	36	4
1 .............. ........ 22	TGAGGTAGTAGGTTTGTGGTTT	5p	1			3		5	5	3		16	4	36	6
1 ........... ......... 20	GAGGTAGTAGGTGTGTGGTT	5p	1					13		5	4	14		36	4
1 ...C................... 23	TGACGTAGTAGGTTGTGTGGTTT	5p	1					3	4	3		16	9	35	5
1 ................C... 20	TGAGGTAGTAGGTTGTCTGG	5p	1				22			3		6	3	34	4
1 .....................A.. 24	TGAGGTAGTAGGTTGTGTGGTATC	5p	1				20		5			5	3	33	4
1 ..........A.......... 21	TGAGGTAGTAAGTTGTGTGGT	5p	1					5	3	7		11	6	32	5
1 ...A................. 21	TGAAGTAGTAGGTTGTGTGGT	5p	1			3	3		3	5		11	7	32	6
1 ................G.... 21	GAGGTAGTAGGTTGTGGGGTT	5p	1			7		5	4	3		13		32	5
1 ....C................ 21	GAGGCAGTAGGTTGTGTGGTT	5p	1					3		4		24		31	3
2 C.................. 19	CGGTAGTAGGTTGTGTGGT	5p	1										31	31	1
1 ...............T..... 21	GAGGTAGTAGGTTGTTTGGTT	5p	1			7		3	3	4	8	5		30	6
1 .......C............. 21	TGAGGTACTAGGTTGTGTGGT	5p	1				6	4	3	3		10	4	30	6
1 .......... .......... 20	GAGGTAGTAGTTGTGTGGTT	5p	1					3		8	4	15		30	4
1 ............C.... 17	TGAGGTAGTAGGCTGTG	5p	1				20	3				7		30	3
1 ................T 16	TGAGGTAGTAGGTTGTT	5p	1				8	3		5		13		29	4
1 ....A................ 21	GAGGAAGTAGGTTGTGTGGTT	5p	1							4	4	20		28	3
1 ......C............. 20	TGAGGTCGTAGGTTGTGTGG	5p	1									12	15	27	2
1 ........C............. 22	GAGGTAGTCGGTTGTGTGGTTT	5p	1									27		27	1
1 ......C.......... 17	TGAGGTCGTAGGTTGTG	5p	1									18	8	26	2
1 .............G......... 23	TGAGGTAGTAGGTGGTGTGGTTT	5p	1			4			5			10	7	26	4
1 .................G 17	TGAGGTAGTAGGTTGTGG	5p	1				6		3	3		10	4	26	5
2 T.................. 19	TGTAGTAGGTTGTGTGGTT	5p	1					4		5		7	9	25	4
1 ...............G.... 20	AGGTAGTAGGTTGTGGGGTT	5p	1					4	5	10	3	3		25	5
1 ...................A 19	GAGGTAGTAGGTTGTGTGGA	5p	1				8	6		3		6		23	4
1 ............A.... 17	TGAGGTAGTAGGATGTG	5p	1			5	6	3	5	4				23	5
1 ........G........... 20	TGAGGTAGGAGGTTGTGTGG	5p	1				3		3			16		22	3
1 ............C....... 20	TGAGGTAGTAGGCTGTGTGG	5p	1				4	4	4	4		6		22	5
1 ........C........... 20	TGAGGTAGCAGGTTGTGTGG	5p	1				5		4			10	3	22	4
1 ...............C..... 21	GAGGTAGTAGGTTGTCTGGTT	5p	1							3		18		21	2
1 .............A....... 21	TGAGGTAGTAGGTAGTGTGGT	5p	1					4	3	7		6		20	4
1 ...........C......... 21	GAGGTAGTAGGCTGTGTGGTT	5p	1						5	5		10		20	3
1 ..........T.......... 21	GAGGTAGTAGTTTGTGTGGTT	5p	1					5			5	10		20	3
1 .........T........... 21	GAGGTAGTATGTTGTGTGGTT	5p	1			3		4		3	3	7		20	5
1 ..........C.......... 21	TGAGGTAGTACGTTGTGTGGT	5p	1							4		13	3	20	3
1 .................C 17	TGAGGTAGTAGGTTGTGC	5p	1			4	10			5				19	3
1 ..............C...... 21	GAGGTAGTAGGTTGCGTGGTT	5p	1					5	5			9		19	3
1 ..C.............. 17	TGCGGTAGTAGGTTGTG	5p	1									11	8	19	2
1 ....A................ 21	TGAGATAGTAGGTTGTGTGGT	5p	1					3	3	5		4	3	18	5
1 ...................G 19	GAGGTAGTAGGTTGTGTGGG	5p	1			4	3			5		6		18	4
1 ................A........ 25	TGAGGTAGTAGGTTGTATGGTTTCA	5p	1				18							18	1
1 .......G.............. 22	GAGGTAGGAGGTTGTGTGGTTT	5p	1									18		18	1
1 ..............G..... 20	GAGGTAGTAGGTTGGGTGGT	5p	1						5			13		18	2
1 ....C................ 21	TGAGCTAGTAGGTTGTGTGGT	5p	1						5			13		18	2
1 ..................A 18	GAGGTAGTAGGTTGTGTGA	5p	1				8			5		5		18	3
1 .......A............. 21	TGAGGTAATAGGTTGTGTGGT	5p	1							5		8	4	17	3
1 ...............A.... 20	TGAGGTAGTAGGTTGAGTGG	5p	1				14			3				17	2
1 ..C................. 20	TGCGGTAGTAGGTTGTGTGG	5p	1				3					9	5	17	3
1 ...........T...... 18	TGAGGTAGTAGTTTGTGT	5p	1				9		3			5		17	3
1 ................A.... 21	GAGGTAGTAGGTTGTGAGGTT	5p	1			3			5	9				17	3
1 .....C.............. 20	TGAGGCAGTAGGTTGTGTGG	5p	1						4	4		8		16	3
1 .........A........... 21	GAGGTAGTAAGTTGTGTGGTT	5p	1							3	3	10		16	3
1 ....C................. 22	GAGGCAGTAGGTTGTGTGGTTT	5p	1									16		16	1
1 ..............A... 18	AGGTAGTAGGTTGTATGG	5p	1				3	5		3		5		16	4
1 ............G....... 20	TGAGGTAGTAGGGTGTGTGG	5p	1						3	3		10		16	3
1 ......T................ 23	TGAGGTTGTAGGTTGTGTGGTTT	5p	1									13	3	16	2
2 G................ 17	GGAGGTAGTAGGTTGTG	5p	1									9	6	15	2
1 .............C... 17	TGAGGTAGTAGGTCGTG	5p	1				15							15	1
1 ........G............ 21	GAGGTAGTGGGTTGTGTGGTT	5p	1									15		15	1
1 ..G................. 20	TGGGGTAGTAGGTTGTGTGG	5p	1									12	3	15	2
2 T...................... 23	TTGAGGTAGTAGGTTGTGTGGTT	5p	1						4	4		7		15	3
1 ..T.................. 21	TGTGGTAGTAGGTTGTGTGGT	5p	1							5		10		15	2
2 T..................... 22	TTGAGGTAGTAGGTTGTGTGGT	5p	1					5	3			7		15	3
1 ....A................. 22	GAGGAAGTAGGTTGTGTGGTTT	5p	1								4	10		14	2
1 .....................C.. 24	TGAGGTAGTAGGTTGTGTGGTCTC	5p	1				14							14	1
1 ......... ............ 21	TGAGGTAGTGGTTGTGTGGTT	5p	1						4			5	5	14	3
1 ....................C 20	GAGGTAGTAGGTTGTGTGGTC	5p	1				7		3			4		14	3
1 ...................A.... 24	TGAGGTAGTAGGTTGTGTGATTTC	5p	1				14							14	1
1 ...............A... 19	TGAGGTAGTAGGTTGAGTG	5p	1				14							14	1
1 ...........T........ 20	TGAGGTAGTAGTTTGTGTGG	5p	1						5			4	5	14	3
1 ..................G.. 21	AGGTAGTAGGTTGTGTGGGTT	5p	1			4				3		7		14	3
2 N...................... 23	NGAGGTAGTAGGTTGTGTGGTTT	5p	1									14		14	1
1 ...............C... 19	TGAGGTAGTAGGTTGCGTG	5p	1				14							14	1
1 .............G....... 21	TGAGGTAGTAGGTGGTGTGGT	5p	1			4	3		3			4		14	4
2 C................ 17	CGAGGTAGTAGGTTGTG	5p	1				3					10		13	2
1 ..............T..... 20	AGGTAGTAGGTTGTTTGGTT	5p	1							4	4	5		13	3
1 ...........T....... 19	TGAGGTAGTAGTTTGTGTG	5p	1				10					3		13	2
1 ...T................ 20	TGATGTAGTAGGTTGTGTGG	5p	1							4		4	5	13	3
1 ...........A......... 21	GAGGTAGTAGGATGTGTGGTT	5p	1					3	5			5		13	3
1 ..............C.. 17	TGAGGTAGTAGGTTCTG	5p	1				10					3		13	2
1 .....G.............. 20	TGAGGGAGTAGGTTGTGTGG	5p	1				5		4			4		13	3
1 ..................C 18	TGAGGTAGTAGGTTGTGTC	5p	1				13							13	1
1 .....................A... 25	TGAGGTAGTAGGTTGTGTGGTATCA	5p	1				13							13	1
1 ................N.... 21	GAGGTAGTAGGTTGTGNGGTT	5p	1			3		7	3					13	3
1 ........................T 24	TGAGGTAGTAGGTTGTGTGGTTTCT	5p	1				3					6	3	12	3
1 ..........T........... 22	GAGGTAGTAGTTTGTGTGGTTT	5p	1								3	9		12	2
1 ................C.. 19	TGAGGTAGTAGGTTGTCTG	5p	1				12							12	1
1 .......... ........... 21	GAGGTAGTAGTTGTGTGGTTT	5p	1								5	7		12	2
1 .................T.... 22	GAGGTAGTAGGTTGTGTTGTTT	5p	1					3			3	6		12	3
2 C................. 18	CTGAGGTAGTAGGTTGTG	5p	1							8		4		12	2
2 G................... 20	GGAGGTAGTAGGTTGTGTGG	5p	1									9	3	12	2
2 C.................... 21	CTGAGGTAGTAGGTTGTGTGG	5p	1				5					4	3	12	3
1 .....................A 21	AGGTAGTAGGTTGTGTGGTTTA	5p	1									12		12	1
1 ............C........ 21	GAGGTAGTAGGTCGTGTGGTT	5p	1			3		3				5		11	3
1 ..........C.......... 21	GAGGTAGTAGCTTGTGTGGTT	5p	1							3		8		11	2
1 ...C................. 21	TGACGTAGTAGGTTGTGTGGT	5p	1				5					6		11	2
1 ...........G........ 20	GAGGTAGTAGGGTGTGTGGT	5p	1								5	6		11	2
1 .....G........... 17	TGAGGGAGTAGGTTGTG	5p	1						3	3		5		11	3
2 A................ 17	AGAGGTAGTAGGTTGTG	5p	1									11		11	1
1 ..............A.... 19	TGAGGTAGTAGGTTATGTG	5p	1				10							10	1
1 ..................T... 22	GAGGTAGTAGGTTGTGTGTTTT	5p	1									10		10	1
1 ..............C...... 21	TGAGGTAGTAGGTTCTGTGGT	5p	1						4			6		10	2
1 ......................A.. 25	TGAGGTAGTAGGTTGTGTGGTTACA	5p	1				10							10	1
1 ........... .......... 21	GAGGTAGTAGGTGTGTGGTTT	5p	1					3				7		10	2
1 ........ ............. 21	TGAGGTAGAGGTTGTGTGGTT	5p	1							3		4	3	10	3
1 .....C............... 21	GAGGTCGTAGGTTGTGTGGTT	5p	1									10		10	1
2 T.................... 21	TGGTAGTAGGTTGTGTGGTTT	5p	1							3		7		10	2
1 .........T........... 21	TGAGGTAGTTGGTTGTGTGGT	5p	1						4			6		10	2
1 .............A..... 19	GGTAGTAGGTTGTATGGTT	5p	1							5		4		9	2
1 ......G............. 20	AGGTAGGAGGTTGTGTGGTT	5p	1									9		9	1
1 ..G.............. 17	TGGGGTAGTAGGTTGTG	5p	1									9		9	1
1 ........T............ 21	GAGGTAGTTGGTTGTGTGGTT	5p	1									9		9	1
1 .................T... 21	GAGGTAGTAGGTTGTGTTGTT	5p	1						3			6		9	2
1 ................C..... 22	GAGGTAGTAGGTTGTGCGGTTT	5p	1			3						6		9	2
1 ....G............... 20	GAGGGAGTAGGTTGTGTGGT	5p	1			3						6		9	2
1 ...................C 19	GAGGTAGTAGGTTGTGTGGC	5p	1				6			3				9	2
1 ................T.. 19	TGAGGTAGTAGGTTGTTTG	5p	1				9							9	1
1 .............G....... 21	AGGTAGTAGGTTGGGTGGTTT	5p	1			4			5					9	2
1 ................C 16	TGAGGTAGTAGGTTGTC	5p	1				9							9	1
1 ..........G......... 20	AGGTAGTAGGGTGTGTGGTT	5p	1			3						6		9	2
1 ....................C... 24	TGAGGTAGTAGGTTGTGTGGCTTC	5p	1				8							8	1
1 ......T.............. 21	GAGGTATTAGGTTGTGTGGTT	5p	1							4		4		8	2
1 .....G............... 21	GAGGTGGTAGGTTGTGTGGTT	5p	1									8		8	1
1 ......G............. 20	TGAGGTGGTAGGTTGTGTGG	5p	1									8		8	1
1 ..........A.......... 21	GAGGTAGTAGATTGTGTGGTT	5p	1						3			5		8	2
1 .................A.. 20	GAGGTAGTAGGTTGTGTAGT	5p	1				5					3		8	2
2 T................... 20	TGTAGTAGGTTGTGTGGTTT	5p	1									5	3	8	2
1 .............C........ 22	GAGGTAGTAGGTTCTGTGGTTT	5p	1							4		4		8	2
1 ...........C......... 21	TGAGGTAGTAGCTTGTGTGGT	5p	1									8		8	1
1 ..................A.. 21	GAGGTAGTAGGTTGTGTGATT	5p	1									7		7	1
1 .......... ......... 19	TGAGGTAGTAGTTGTGTGG	5p	1									4	3	7	2
1 ........................C 24	TGAGGTAGTAGGTTGTGTGGTTTCC	5p	1				7							7	1
1 .........C.......... 20	TGAGGTAGTCGGTTGTGTGG	5p	1									3	4	7	2
1 ..........C......... 20	AGGTAGTAGGCTGTGTGGTT	5p	1									7		7	1
1 ..............T..... 20	TGAGGTAGTAGGTTTTGTGG	5p	1				7							7	1
2 C................. 18	CGGTAGTAGGTTGTGTGG	5p	1										7	7	1
1 .......T............ 20	TGAGGTATTAGGTTGTGTGG	5p	1							3		4		7	2
1 ..................C.. 21	GAGGTAGTAGGTTGTGTGCTT	5p	1				3			4				7	2
1 ....................C 20	AGGTAGTAGGTTGTGTGGTTC	5p	1									7		7	1
1 ..............T.. 17	TGAGGTAGTAGGTTTTG	5p	1				3					4		7	2
1 ...........C.......... 22	GAGGTAGTAGGCTGTGTGGTTT	5p	1									7		7	1
1 ........................G 24	TGAGGTAGTAGGTTGTGTGGTTTCG	5p	1				7							7	1
1 .............T....... 21	GAGGTAGTAGGTTTTGTGGTT	5p	1							4		3		7	2
1 ..A.................. 21	GAAGTAGTAGGTTGTGTGGTT	5p	1								3	3		6	2
1 .....T............... 21	GAGGTTGTAGGTTGTGTGGTT	5p	1									6		6	1
1 ............G...... 19	TGAGGTAGTAGGGTGTGTG	5p	1									6		6	1
1 ......... ............. 22	TGAGGTAGTGGTTGTGTGGTTT	5p	1							3		3		6	2
1 ..............A...... 21	GAGGTAGTAGGTTGAGTGGTT	5p	1			3				3				6	2
1 .......N.............. 22	TGAGGTANTAGGTTGTGTGGTT	5p	1									6		6	1
1 .....A.............. 20	TGAGGAAGTAGGTTGTGTGG	5p	1									3	3	6	2
1 ......T.............. 21	TGAGGTTGTAGGTTGTGTGGT	5p	1									6		6	1
1 .............G... 17	TGAGGTAGTAGGTGGTG	5p	1				6							6	1
1 ....................G... 24	TGAGGTAGTAGGTTGTGTGGGTTC	5p	1						3			3		6	2
1 ..........A...... 17	TGAGGTAGTAAGTTGTG	5p	1									3	3	6	2
1 .............C...... 20	TGAGGTAGTAGGTCGTGTGG	5p	1				3					3		6	2
2 A.................... 21	AAGGTAGTAGGTTGTGTGGTT	5p	1									3	3	6	2
2 N.................... 21	NGAGGTAGTAGGTTGTGTGGT	5p	1									6		6	1
1 .............A....... 21	GAGGTAGTAGGTTATGTGGTT	5p	1							3		3		6	2
1 ................G..... 22	GAGGTAGTAGGTTGTGGGGTTT	5p	1							3		3		6	2
1 ................A..... 22	GAGGTAGTAGGTTGTGAGGTTT	5p	1							3		3		6	2
1 .......C............. 21	GAGGTAGCAGGTTGTGTGGTT	5p	1									6		6	1
1 ......G............ 19	AGGTAGGAGGTTGTGTGGT	5p	1									6		6	1
1 ...............A.. 18	GAGGTAGTAGGTTGTATG	5p	1					3				3		6	2
1 .................A..... 23	GTGAGGTAGTAGGTTGTATGGTT	5p	1			3						3		6	2
1 .....G................ 22	GAGGTGGTAGGTTGTGTGGTTT	5p	1					3				3		6	2
1 ........G............. 22	GAGGTAGTGGGTTGTGTGGTTT	5p	1							3		3		6	2
2 G................... 20	GGGTAGTAGGTTGTGTGGTT	5p	1									5		5	1
1 ...................N.. 22	TGAGGTAGTAGGTTGTGTGNTT	5p	1									5		5	1
1 ...............C.. 18	TGAGGTAGTAGGTTGCGT	5p	1				5							5	1
1 ...A............. 17	TGAAGTAGTAGGTTGTG	5p	1									5		5	1
1 ...........A.......... 22	GAGGTAGTAGGATGTGTGGTTT	5p	1									5		5	1
1 ....A............... 20	GAGGAAGTAGGTTGTGTGGT	5p	1									5		5	1
2 A.................. 19	AGTAGTAGGTTGTGTGGTT	5p	1									5		5	1
1 ..................T 18	GAGGTAGTAGGTTGTGTGT	5p	1									5		5	1
1 .......A............. 21	GAGGTAGAAGGTTGTGTGGTT	5p	1									5		5	1
1 ............A........ 21	GAGGTAGTAGGTAGTGTGGTT	5p	1									5		5	1
1 .....................C... 25	TGAGGTAGTAGGTTGTGTGGTCTCA	5p	1				4							4	1
1 .............C...... 20	AGGTAGTAGGTTGCGTGGTT	5p	1									4		4	1
1 ...........A........ 20	TGAGGTAGTAGATTGTGTGG	5p	1							4				4	1
1 ...G................ 20	AGGGAGTAGGTTGTGTGGTT	5p	1									4		4	1
1 ..................A... 22	GAGGTAGTAGGTTGTGTGATTT	5p	1				4							4	1
1 ......G.............. 21	AGGTAGGAGGTTGTGTGGTTT	5p	1									4		4	1
1 ..........T......... 20	TGAGGTAGTATGTTGTGTGG	5p	1									4		4	1
1 ..............G.... 19	GAGGTAGTAGGTTGGGTGG	5p	1									4		4	1
1 ................A... 20	AGGTAGTAGGTTGTGTAGTT	5p	1							4				4	1
1 ...........A..... 17	TGAGGTAGTAGATTGTG	5p	1									4		4	1
1 ............C......... 22	GAGGTAGTAGGTCGTGTGGTTT	5p	1									4		4	1
1 ..........A......... 20	TGAGGTAGTAAGTTGTGTGG	5p	1							4				4	1
1 ...T............. 17	TGATGTAGTAGGTTGTG	5p	1									4		4	1
1 ...................C.... 24	TGAGGTAGTAGGTTGTGTGCTTTC	5p	1				4							4	1
1 ...............A....... 23	GAGGTAGTAGGTTGTATGGTTTC	5p	1									4		4	1
1 .........N............ 22	TGAGGTAGTNGGTTGTGTGGTT	5p	1									4		4	1
2 C.................... 21	CAGGTAGTAGGTTGTGTGGTT	5p	1										4	4	1
1 ..T.................. 21	GATGTAGTAGGTTGTGTGGTT	5p	1									4		4	1
1 ......C............ 19	TGAGGTCGTAGGTTGTGTG	5p	1									4		4	1
1 ........C........... 20	GAGGTAGTCGGTTGTGTGGT	5p	1									4		4	1
1 .....T................ 22	GAGGTTGTAGGTTGTGTGGTTT	5p	1									4		4	1
1 ....................G 20	AGGTAGTAGGTTGTGTGGTTG	5p	1									4		4	1
1 ...T................. 21	GAGTTAGTAGGTTGTGTGGTT	5p	1									4		4	1
1 ..........A........... 22	GAGGTAGTAGATTGTGTGGTTT	5p	1						3					3	1
2 T.................. 19	TGGTAGTAGGTTGTGTGGT	5p	1									3		3	1
1 ........C.......... 19	TGAGGTAGCAGGTTGTGTG	5p	1									3		3	1
1 .................C... 21	GAGGTAGTAGGTTGTGTCGTT	5p	1									3		3	1
1 ..................A 18	AGGTAGTAGGTTGTGTGGA	5p	1				3							3	1
1 .....................G.. 24	TGAGGTAGTAGGTTGTGTGGTGTC	5p	1				3							3	1
1 ...............A.. 18	TGAGGTAGTAGGTTGAGT	5p	1				3							3	1
2 T...................... 23	TAGGTAGTAGGTTGTGTGGTTTC	5p	1										3	3	1
1 .............C....... 21	AGGTAGTAGGTTGCGTGGTTT	5p	1							3				3	1
1 .................A.... 22	GAGGTAGTAGGTTGTGTAGTTT	5p	1						3					3	1
1 ................G.. 19	GAGGTAGTAGGTTGTGGGG	5p	1							3				3	1
1 .........T............ 22	GAGGTAGTATGTTGTGTGGTTT	5p	1									3		3	1
1 .......G............ 20	AGGTAGTGGGTTGTGTGGTT	5p	1									3		3	1
1 ......................G 22	GAGGTAGTAGGTTGTGTGGTTTG	5p	1					3						3	1
1 ....A............... 20	TGAGATAGTAGGTTGTGTGG	5p	1									3		3	1
1 ....T............... 20	TGAGTTAGTAGGTTGTGTGG	5p	1									3		3	1
1 ........ .............. 22	TGAGGTAGAGGTTGTGTGGTTT	5p	1									3		3	1
1 ...A................ 20	AGGAAGTAGGTTGTGTGGTT	5p	1									3		3	1
1 ...A................ 20	TGAAGTAGTAGGTTGTGTGG	5p	1									3		3	1
1 ............T....... 20	AGGTAGTAGGTTTTGTGGTT	5p	1									3		3	1
2 C.................. 19	CGTGAGGTAGTAGGTTGTG	5p	1				3							3	1
1 .....C................ 22	GAGGTCGTAGGTTGTGTGGTTT	5p	1									3		3	1
2 G.................. 19	GGAGGTAGTAGGTTGTGTG	5p	1										3	3	1
1 ..........T........ 19	GAGGTAGTAGTTTGTGTGG	5p	1									3		3	1
1 ........A........... 20	TGAGGTAGAAGGTTGTGTGG	5p	1									3		3	1
1 ...........G....... 19	GAGGTAGTAGGGTGTGTGG	5p	1									3		3	1
2 A...................... 23	ATGAGGTAGTAGGTTGTGTGGTT	5p	1						3					3	1
1 ................N..... 22	GAGGTAGTAGGTTGTGNGGTTT	5p	1					3						3	1
1 ....C............... 20	AGGTCGTAGGTTGTGTGGTT	5p	1									3		3	1
1 .........G.......... 20	TGAGGTAGTGGGTTGTGTGG	5p	1									3		3	1
1 ...............T...... 22	GAGGTAGTAGGTTGTTTGGTTT	5p	1						3					3	1
1 ..............C..... 20	TGAGGTAGTAGGTTCTGTGG	5p	1				3							3	1
1 ...............N..... 21	GAGGTAGTAGGTTGTNTGGTT	5p	1	3										3	1
1 .................A 17	AGGTAGTAGGTTGTGTGA	5p	1									3		3	1
1 .......C............. 21	AGGTAGTCGGTTGTGTGGTTT	5p	1									3		3	1
1 ..............C....... 22	GAGGTAGTAGGTTGCGTGGTTT	5p	1									3		3	1
1 ...........A....... 19	TGAGGTAGTAGATTGTGTG	5p	1				3							3	1
1 .......A............ 20	TGAGGTAATAGGTTGTGTGG	5p	1							3				3	1
1 ............N......... 22	TGAGGTAGTAGGNTGTGTGGTT	5p	1										3	3	1
1 ...T................ 20	GAGTTAGTAGGTTGTGTGGT	5p	1									3		3	1
1 .................T.. 20	GAGGTAGTAGGTTGTGTTGT	5p	1								3			3	1
1 ............G........ 21	GAGGTAGTAGGTGGTGTGGTT	5p	1									3		3	1
1 .............G...... 20	TGAGGTAGTAGGTGGTGTGG	5p	1									3		3	1
1 ..................... 21	CTATACAACCTACTGCCTTCC	3p	0									3	3	6	2
1 .....................T 21	CTATACAACCTACTGCCTTCCT	3p	1							3	3	6		12	3
cluster No. 4
38552588 AAATGGGTTCCTAGGAAGAGGTAGTAGGTTGCATAGTTTTAGGGCAGAGATTTTGCCCACAAGGAGGTAACTATACGACCTGCTGCCTTTCTTAGGGCCTTATTAT 38552693 new hairpin
1 .....................................G................................................ 86 ptr-let-7d
1 ......................................G................................................ 87 hsa-let-7d
1 ......C.......................................G..................T.........A.....................TC...... 105 mdo-let-7d
1 ....C..........................................................T.................................. 98 rno-let-7d
1 ...............................C......G................................................ 87 bta-let-7d
1 .................................................................T..................................... 103 mmu-let-7d
1 ...................... 22	AGAGGTAGTAGGTTGCATAGTT	5p	0	393	312	8665	577	6746	6528	6360	1035	4052	6	34674	10
1 ....................... 23	AGAGGTAGTAGGTTGCATAGTTT	5p	0	19	17	718	35	572	604	600	142	374		3081	9
1 ..................... 21	AGAGGTAGTAGGTTGCATAGT	5p	0	21	10	416	45	416	439	437	68	321		2173	9
1 ..................... 21	GAGGTAGTAGGTTGCATAGTT	5p	0	4		121	7	78	76	91	7	89	3	476	9
1 .................... 20	AGAGGTAGTAGGTTGCATAG	5p	0			59	24	44	76	92	21	83		399	7
1 .................. 18	AGAGGTAGTAGGTTGCAT	5p	0			10	12	15	13	23	4	19		96	7
1 ................... 19	AGAGGTAGTAGGTTGCATA	5p	0			14	6	6	6	18	3	17		70	7
1 ........................ 24	AGAGGTAGTAGGTTGCATAGTTTT	5p	0			15		9	11	7		9		51	5
1 ...................... 22	GAGGTAGTAGGTTGCATAGTTT	5p	0			6		3	5	7	6	11		38	6
1 .................... 20	GAGGTAGTAGGTTGCATAGT	5p	0			6		5	3	11		10		35	5
1 ................. 17	AGAGGTAGTAGGTTGCA	5p	0			3	18	5		9				35	4
1 ....................... 23	AAGAGGTAGTAGGTTGCATAGTT	5p	0			8		6	4	7	3			28	5
1 .................... 20	AGGTAGTAGGTTGCATAGTT	5p	0			4		6	8			7		25	4
1 ...................... 22	AAGAGGTAGTAGGTTGCATAGT	5p	0			3		5	3			3		14	4
1 ................ 16	AGAGGTAGTAGGTTGC	5p	0				10							10	1
1 ................... 19	GAGGTAGTAGGTTGCATAG	5p	0				3							3	1
1 ..............T...... 21	GAGGTAGTAGGTTGTATAGTT	5p	1	216	63	4314	206	4945	4381	4161	1407	4476	66	24235	10
1 ......................A 22	AGAGGTAGTAGGTTGCATAGTTA	5p	1	22	22	704	42	518	462	522	119	332		2743	9
1 .............T...... 20	AGGTAGTAGGTTGTATAGTT	5p	1	20	3	469	28	548	433	426	137	525		2589	9
1 ...............T...... 22	AGAGGTAGTAGGTTGTATAGTT	5p	1	18	35	348	70	297	254	219	41	931	130	2343	10
2 T..................... 22	TGAGGTAGTAGGTTGCATAGTT	5p	1	5	63	592	30	382	458	397	11	279	73	2290	10
1 ..............T..... 20	GAGGTAGTAGGTTGTATAGT	5p	1	10	3	290	30	423	415	495	120	460	5	2251	10
1 ..............T....... 22	GAGGTAGTAGGTTGTATAGTTT	5p	1	12	5	297	16	406	385	374	103	478		2076	9
2 C..................... 22	CGAGGTAGTAGGTTGCATAGTT	5p	1			3	12			3		25	998	1041	5
1 ............A......... 22	AGAGGTAGTAGGATGCATAGTT	5p	1	8	7	163	4	132	97	83	5	29		528	9
1 ..............G...... 21	GAGGTAGTAGGTTGGATAGTT	5p	1	9		115		61	69	51	27	50		382	7
1 .....................A 21	AGAGGTAGTAGGTTGCATAGTA	5p	1			60	12	45	61	60	6	43		287	7
1 ............C......... 22	AGAGGTAGTAGGCTGCATAGTT	5p	1	3	3	73	3	50	57	41	5	36		271	9
1 ..............T.... 19	GAGGTAGTAGGTTGTATAG	5p	1			20	17	41	43	45	13	70		249	7
1 ........G............. 22	AGAGGTAGGAGGTTGCATAGTT	5p	1	31	23	97		26	29	4		20		230	7
1 .............T....... 21	AGGTAGTAGGTTGTATAGTTT	5p	1			30		33	45	32	21	57		218	6
1 ...............T..... 21	AGAGGTAGTAGGTTGTATAGT	5p	1			24	14	19	21	22	5	91	16	212	8
1 .............T..... 19	AGGTAGTAGGTTGTATAGT	5p	1			24	3	38	28	54	10	43		200	7
1 ..................G... 22	AGAGGTAGTAGGTTGCATGGTT	5p	1	15	9	58	4	18	30	21	24	18		197	9
2 T................... 20	TGAGGTAGTAGGTTGCATAG	5p	1				177			10		6		193	3
1 ...............T....... 23	AGAGGTAGTAGGTTGTATAGTTT	5p	1		3	20	6	15	15	21		64	14	158	8
1 ................G..... 22	AGAGGTAGTAGGTTGCGTAGTT	5p	1		5	41		15	33	23	22	15		154	7
2 C...................... 23	CGAGGTAGTAGGTTGCATAGTTT	5p	1										138	138	1
2 T...................... 23	TGAGGTAGTAGGTTGCATAGTTT	5p	1			34		20	29	27		17	8	135	6
1 ......................G 22	AGAGGTAGTAGGTTGCATAGTTG	5p	1			22	5	18	27	35	5	21		133	7
1 .....G................ 22	AGAGGGAGTAGGTTGCATAGTT	5p	1	12	13	21		14	14	25	13	12		124	8
1 ................C..... 22	AGAGGTAGTAGGTTGCCTAGTT	5p	1			21		14	18	18	4	39		114	6
1 .....................G 21	AGAGGTAGTAGGTTGCATAGTG	5p	1	8	10	47		15	19	10		3		112	7
1 .................G.... 22	AGAGGTAGTAGGTTGCAGAGTT	5p	1	18	7	43		13	13	6	4			104	7
2 T.................... 21	TGAGGTAGTAGGTTGCATAGT	5p	1			20		15	17	24		20	7	103	6
1 ..............T....... 22	AGAGGTAGTAGGTTTCATAGTT	5p	1	4	6	24		19	11	19	5	10		98	8
2 C.................... 21	CGAGGTAGTAGGTTGCATAGT	5p	1										95	95	1
1 ...............G...... 22	AGAGGTAGTAGGTTGGATAGTT	5p	1	25	9	28		5	10	3		6	4	90	8
1 .....C................ 22	AGAGGCAGTAGGTTGCATAGTT	5p	1	6	10	15		11	12	25		8		87	7
1 ............G......... 22	AGAGGTAGTAGGGTGCATAGTT	5p	1	3		29		13	22	8		11		86	6
1 ................N..... 22	AGAGGTAGTAGGTTGCNTAGTT	5p	1			27		12	17	26				82	4
1 ......................C 22	AGAGGTAGTAGGTTGCATAGTTC	5p	1			14		12	22	15	7	9		79	6
1 ............ ......... 21	AGAGGTAGTAGGTGCATAGTT	5p	1			19		20	6	17		17		79	5
1 .................C.... 22	AGAGGTAGTAGGTTGCACAGTT	5p	1		13	21		10	14	14		6		78	6
1 ...........T.......... 22	AGAGGTAGTAGTTTGCATAGTT	5p	1			16		16	10	4	7	16		69	6
1 .............G...... 20	AGGTAGTAGGTTGGATAGTT	5p	1			24		16	12	8		7		67	5
2 T.................. 19	TGAGGTAGTAGGTTGCATA	5p	1				63							63	1
1 ...........A.......... 22	AGAGGTAGTAGATTGCATAGTT	5p	1		13	14		11	6	7		6		57	6
1 .......... ........... 21	AGAGGTAGTAGTTGCATAGTT	5p	1			11		15	6	12	4	8		56	6
1 .....A................ 22	AGAGGAAGTAGGTTGCATAGTT	5p	1	4	12	11		4	3	10	4	6		54	8
1 ..............A....... 22	AGAGGTAGTAGGTTACATAGTT	5p	1			20		10	4	11		7		52	5
2 T................ 17	TGAGGTAGTAGGTTGCA	5p	1				51							51	1
1 ........C............. 22	AGAGGTAGCAGGTTGCATAGTT	5p	1			8		8	4	9		21		50	5
1 .............C........ 22	AGAGGTAGTAGGTCGCATAGTT	5p	1			9		12	7	16		6		50	5
1 ...................T.. 22	AGAGGTAGTAGGTTGCATATTT	5p	1			17		13	6	9		4		49	5
1 ........A............. 22	AGAGGTAGAAGGTTGCATAGTT	5p	1		8	6		9		12	3	11		49	6
1 ...............A...... 22	AGAGGTAGTAGGTTGAATAGTT	5p	1		3	13		5	9	13		5		48	6
1 ..............T.. 17	GAGGTAGTAGGTTGTAT	5p	1			8		6	8	8	7	10		47	6
1 ............A.......... 23	AGAGGTAGTAGGATGCATAGTTT	5p	1			19		9	10	5		4		47	5
1 .....................C 21	AGAGGTAGTAGGTTGCATAGTC	5p	1			7	6	8	7	13		3		44	6
1 ..................C... 22	AGAGGTAGTAGGTTGCATCGTT	5p	1			18		4	7	8		7		44	5
2 G..................... 22	GGAGGTAGTAGGTTGCATAGTT	5p	1			9	6	10	9	3		5		42	6
1 ..............G..... 20	GAGGTAGTAGGTTGGATAGT	5p	1			3		5	11	6	4	12		41	6
1 ..............T... 18	GAGGTAGTAGGTTGTATA	5p	1			5		5	4	11		15		40	5
1 .....................A 21	GAGGTAGTAGGTTGCATAGTTA	5p	1			10		8	4	12		5		39	5
2 C................... 20	CGAGGTAGTAGGTTGCATAG	5p	1				3						34	37	2
1 ......C............... 22	AGAGGTCGTAGGTTGCATAGTT	5p	1			6		5		3		22		36	4
1 ............A........ 21	AGAGGTAGTAGGATGCATAGT	5p	1			10		8	6	11				35	4
1 ..............G....... 22	GAGGTAGTAGGTTGGATAGTTT	5p	1			12		7		6		9		34	4
1 .............A........ 22	AGAGGTAGTAGGTAGCATAGTT	5p	1			7		9	4	12				32	4
1 ..G................... 22	AGGGGTAGTAGGTTGCATAGTT	5p	1	3		5		4				19		31	4
1 .............G........ 22	AGAGGTAGTAGGTGGCATAGTT	5p	1	3		12		5	7			3		30	5
1 ...............T.... 20	AGAGGTAGTAGGTTGTATAG	5p	1			3	3		3	3		15	3	30	6
1 ....T................. 22	AGAGTTAGTAGGTTGCATAGTT	5p	1	5		3		10		3		8		29	5
1 ..........A.......... 21	GAGGTAGTAGATTGCATAGTT	5p	1			8		5	5	4		7		29	5
1 .......T.............. 22	AGAGGTATTAGGTTGCATAGTT	5p	1			7			3	10		8		28	4
1 .........C............ 22	AGAGGTAGTCGGTTGCATAGTT	5p	1			9					5	13		27	3
1 ....................A 20	AGAGGTAGTAGGTTGCATAGA	5p	1			6	3	6		6		5		26	5
1 ..............T........ 23	GAGGTAGTAGGTTGTATAGTTTT	5p	1			4		3	7	3		8		25	5
1 ...................A 19	AGAGGTAGTAGGTTGCATAA	5p	1			4		5		3		13		25	4
1 ..........A........... 22	AGAGGTAGTAAGTTGCATAGTT	5p	1			6		6		5		6		23	4
1 ..................T... 22	AGAGGTAGTAGGTTGCATTGTT	5p	1			5		4	7	7				23	4
2 T................. 18	TGAGGTAGTAGGTTGCAT	5p	1				22							22	1
1 ............C.......... 23	AGAGGTAGTAGGCTGCATAGTTT	5p	1			3		4	6	3		6		22	5
1 ......G............... 22	AGAGGTGGTAGGTTGCATAGTT	5p	1			4		4	3			11		22	4
1 ...T.................. 22	AGATGTAGTAGGTTGCATAGTT	5p	1			4		8	4	5				21	4
1 ................T..... 22	AGAGGTAGTAGGTTGCTTAGTT	5p	1			7		3	4	3		4		21	5
1 ..C................... 22	AGCGGTAGTAGGTTGCATAGTT	5p	1			8				4		8		20	3
1 ..................T 18	AGAGGTAGTAGGTTGCATT	5p	1			5			3	4		7		19	4
1 .................G... 21	GAGGTAGTAGGTTGCATGGTT	5p	1					4	3	6		6		19	4
1 ............C........ 21	AGAGGTAGTAGGCTGCATAGT	5p	1			4			8	4		3		19	4
1 ....................G.. 23	AGAGGTAGTAGGTTGCATAGGTT	5p	1			10		5		3				18	3
1 .............T.... 18	AGGTAGTAGGTTGTATAG	5p	1			6				4		8		18	3
1 ..................G.... 23	AGAGGTAGTAGGTTGCATGGTTT	5p	1			5			3	3	4	3		18	5
1 ..............C....... 22	AGAGGTAGTAGGTTCCATAGTT	5p	1		4			3		3	3	4		17	5
1 ..........C........... 22	AGAGGTAGTACGTTGCATAGTT	5p	1			5		6				4		15	3
1 ....................G 20	AGAGGTAGTAGGTTGCATAGG	5p	1			4		3	4	4				15	4
1 ....A................. 22	AGAGATAGTAGGTTGCATAGTT	5p	1						4	6		4		14	3
1 ..........T........... 22	AGAGGTAGTATGTTGCATAGTT	5p	1			4		3		3		4		14	4
1 ..............A...... 21	GAGGTAGTAGGTTGAATAGTT	5p	1					5	4	4				13	3
1 ....C................. 22	AGAGCTAGTAGGTTGCATAGTT	5p	1							3		10		13	2
1 .......................A 23	AGAGGTAGTAGGTTGCATAGTTTA	5p	1					6	3	3				12	3
1 ...................C.. 22	AGAGGTAGTAGGTTGCATACTT	5p	1			4			3	5				12	3
2 T.................... 21	TAGGTAGTAGGTTGCATAGTT	5p	1										12	12	1
1 ...A.................. 22	AGAAGTAGTAGGTTGCATAGTT	5p	1				3			3		5		11	3
1 .................A.... 22	AGAGGTAGTAGGTTGCAAAGTT	5p	1					3		7				10	2
1 ....G................ 21	GAGGGAGTAGGTTGCATAGTT	5p	1			4			3			3		10	3
1 ........G............ 21	AGAGGTAGGAGGTTGCATAGT	5p	1			6			4					10	2
1 ....................A.. 23	AGAGGTAGTAGGTTGCATAGATT	5p	1			4		3		3				10	3
1 .............A...... 20	AGGTAGTAGGTTGAATAGTT	5p	1			4		5						9	2
1 ......T............... 22	AGAGGTTGTAGGTTGCATAGTT	5p	1			4						5		9	2
1 .......C.............. 22	AGAGGTACTAGGTTGCATAGTT	5p	1			5			4					9	2
1 ...........C.......... 22	AGAGGTAGTAGCTTGCATAGTT	5p	1					5				4		9	2
1 ........G.............. 23	AGAGGTAGGAGGTTGCATAGTTT	5p	1			5						4		9	2
1 .....G................. 23	AGAGGGAGTAGGTTGCATAGTTT	5p	1			4						4		8	2
2 C...................... 23	CAGAGGTAGTAGGTTGCATAGTT	5p	1			5				3				8	2
1 ............G.......... 23	AGAGGTAGTAGGGTGCATAGTTT	5p	1			8								8	1
1 ................C.... 21	AGAGGTAGTAGGTTGCCTAGT	5p	1			3						5		8	2
1 ...................A.. 22	AGAGGTAGTAGGTTGCATAATT	5p	1					3		5				8	2
1 ................C...... 23	AGAGGTAGTAGGTTGCCTAGTTT	5p	1						3			4		7	2
1 .....G............... 21	AGAGGGAGTAGGTTGCATAGT	5p	1			3				4				7	2
1 ............T...... 19	GGTAGTAGGTTGTATAGTT	5p	1								3	4		7	2
1 ...............N...... 22	AGAGGTAGTAGGTTGNATAGTT	5p	1	7										7	1
1 ....................C.. 23	AGAGGTAGTAGGTTGCATAGCTT	5p	1			4			3					7	2
1 .............T... 17	AGGTAGTAGGTTGTATA	5p	1							3		3		6	2
1 .........G............ 22	AGAGGTAGTGGGTTGCATAGTT	5p	1					3	3					6	2
1 .........A.......... 20	AGGTAGTAGATTGCATAGTT	5p	1					3		3				6	2
2 C....................... 24	CGAGGTAGTAGGTTGCATAGTTTT	5p	1										4	4	1
2 C................. 18	CGAGGTAGTAGGTTGCAT	5p	1										4	4	1
1 .....C................. 23	AGAGGCAGTAGGTTGCATAGTTT	5p	1							4				4	1
2 C.................. 19	CGAGGTAGTAGGTTGCATA	5p	1										4	4	1
1 .............. ........ 22	AGAGGTAGTAGGTTCATAGTTT	5p	1			4								4	1
1 .................G... 21	AGAGGTAGTAGGTTGCAGAGT	5p	1			4								4	1
1 ......C................ 23	AGAGGTCGTAGGTTGCATAGTTT	5p	1									4		4	1
1 .............C....... 21	AGAGGTAGTAGGTCGCATAGT	5p	1							4				4	1
1 ........C............ 21	AGAGGTAGCAGGTTGCATAGT	5p	1									4		4	1
1 ..................T.. 21	AGAGGTAGTAGGTTGCATTGT	5p	1									3		3	1
1 ..................C.... 23	AGAGGTAGTAGGTTGCATCGTTT	5p	1							3				3	1
1 ...............G..... 21	AGAGGTAGTAGGTTGGATAGT	5p	1	3										3	1
1 ............ .......... 22	AGAGGTAGTAGGTGCATAGTTT	5p	1									3		3	1
2 C................ 17	CGAGGTAGTAGGTTGCA	5p	1										3	3	1
1 ...A................... 23	AGAAGTAGTAGGTTGCATAGTTT	5p	1							3				3	1
1 ...............T.. 18	AGAGGTAGTAGGTTGTAT	5p	1									3		3	1
1 .......A.............. 22	AGAGGTAATAGGTTGCATAGTT	5p	1					3						3	1
1 ....................A 20	AGGTAGTAGGTTGCATAGTTA	5p	1					3						3	1
1 ........... ........... 22	AGAGGTAGTAGTTGCATAGTTT	5p	1								3			3	1
1 ................G...... 23	AGAGGTAGTAGGTTGCGTAGTTT	5p	1							3				3	1
1 ..T................... 22	AGTGGTAGTAGGTTGCATAGTT	5p	1									3		3	1
1 ................G.... 21	AGAGGTAGTAGGTTGCGTAGT	5p	1					3						3	1
1 ....................C 20	AGAGGTAGTAGGTTGCATAGC	5p	1					3						3	1
1 ................G... 20	AGGTAGTAGGTTGCATGGTT	5p	1			3								3	1
1 .............T........ 22	AGGTAGTAGGTTGTATAGTTTT	5p	1									3		3	1
1 ...C.................. 22	AGACGTAGTAGGTTGCATAGTT	5p	1					3						3	1
1 ..................G.. 21	AGAGGTAGTAGGTTGCATGGT	5p	1			3								3	1
1 .....A............... 21	AGAGGAAGTAGGTTGCATAGT	5p	1							3				3	1
1 ...................... 22	CTATACGACCTGCTGCCTTTCT	3p	0			5	4	6	4	4	10	17	6	56	8
1 ..................... 21	CTATACGACCTGCTGCCTTTC	3p	0									6		6	1
1 .....................A 21	CTATACGACCTGCTGCCTTTCA	3p	1									6	3	9	2
cluster No. 5
39533369 CCGCGCGCCCCGGGCTGAGGTAGGAGGTTGTATAGTTGAGGAGGACACCCACGGAGATCACTATACGGCCTCCTAGCTTTCCCCAGGCTGCGC 39533461 new hairpin
1 ................................................................... 67 cfa-let-7e
1 ..........................................A................................... 78 ptr-let-7e
1 ...........................................A................................... 79 hsa-let-7e
1 .....C...................................A.......GA......................................... 92 mmu-let-7e
1 ...................... 22	TGAGGTAGGAGGTTGTATAGTT	5p	0	1131	315	12457	855	8228	11573	6343	295	6541	2393	50131	10
1 ..................... 21	TGAGGTAGGAGGTTGTATAGT	5p	0	65	18	1000	145	862	1215	688	29	817	287	5126	10
1 ....................... 23	TGAGGTAGGAGGTTGTATAGTTG	5p	0	35	4	381	49	276	505	294	14	296	170	2024	10
1 ..................... 21	GAGGTAGGAGGTTGTATAGTT	5p	0	50	8	354	18	228	217	170	70	230	3	1348	10
1 .................... 20	TGAGGTAGGAGGTTGTATAG	5p	0	4		90	74	92	162	111	9	159	50	751	9
1 .................... 20	AGGTAGGAGGTTGTATAGTT	5p	0	4		51		35	37	21	14	41		203	7
1 .................... 20	GAGGTAGGAGGTTGTATAGT	5p	0			36		22	25	25	10	24		142	6
1 ........................ 24	TGAGGTAGGAGGTTGTATAGTTGA	5p	0			28	7	21	33	19		26	8	142	7
1 .................. 18	TGAGGTAGGAGGTTGTAT	5p	0			10	3	7	18	14		30	10	92	7
1 ....................... 23	CTGAGGTAGGAGGTTGTATAGTT	5p	0	5		13		12	18	16		5	3	72	7
1 ................... 19	TGAGGTAGGAGGTTGTATA	5p	0			13		7	9	10		21		60	5
1 ...................... 22	GAGGTAGGAGGTTGTATAGTTG	5p	0			19		13	4	8		8		52	5
1 ................... 19	GAGGTAGGAGGTTGTATAG	5p	0			3	4			7		3		17	4
1 ................... 19	AGGTAGGAGGTTGTATAGT	5p	0			4		6						10	2
1 ..................... 21	AGGTAGGAGGTTGTATAGTTG	5p	0			3		3				3		9	3
1 ................ 16	TGAGGTAGGAGGTTGT	5p	0			4	3							7	2
1 ....................... 23	GAGGTAGGAGGTTGTATAGTTGA	5p	0							3				3	1
1 ...................... 23	TGAGGTAGGAGGTTGTATAGTT	5p	0					3						3	1
1 ........T............. 22	TGAGGTAGTAGGTTGTATAGTT	5p	1	5028	3371	162394	13846	183686	254451	160941	7894	153114	67058	1011783	10
1 ........T............ 21	TGAGGTAGTAGGTTGTATAGT	5p	1	170	88	9414	2049	14875	22118	14732	686	15174	7309	86615	10
1 .......T............. 21	GAGGTAGTAGGTTGTATAGTT	5p	1	216	63	4314	206	4945	4381	4161	1407	4476	66	24235	10
1 ........T........... 20	TGAGGTAGTAGGTTGTATAG	5p	1	12	11	873	880	1379	2403	2012	81	2395	1166	11212	10
1 ......................A 22	TGAGGTAGGAGGTTGTATAGTTA	5p	1	148	23	1557	123	1134	1492	915	49	928	387	6756	10
1 ......................T 22	TGAGGTAGGAGGTTGTATAGTTT	5p	1	114	18	1277	91	906	1396	710	34	775	277	5598	10
1 ........T.............. 23	TGAGGTAGTAGGTTGTATAGTTG	5p	1	10	3	520	129	692	1201	827	46	941	527	4896	10
1 ..................G... 22	TGAGGTAGGAGGTTGTATGGTT	5p	1	339	67	1368	44	375	637	327	33	757	48	3995	10
1 ...........A.......... 22	TGAGGTAGGAGATTGTATAGTT	5p	1	34	55	772	14	368	447	113	9	716	63	2591	10
1 ......T............. 20	AGGTAGTAGGTTGTATAGTT	5p	1	20	3	469	28	548	433	426	137	525		2589	9
1 ...............G...... 22	TGAGGTAGGAGGTTGGATAGTT	5p	1	178	85	989	12	288	600	82	8	96	7	2345	10
1 .......T............ 20	GAGGTAGTAGGTTGTATAGT	5p	1	10	3	290	30	423	415	495	120	460	5	2251	10
1 ........T.......... 19	TGAGGTAGTAGGTTGTATA	5p	1	6		104	151	147	235	229	12	390	154	1428	9
1 .........T............. 23	CTGAGGTAGTAGGTTGTATAGTT	5p	1	19	5	215	21	236	325	250	43	217	62	1393	10
1 ........A............. 22	TGAGGTAGAAGGTTGTATAGTT	5p	1	14	52	91		135	158	302	12	346	68	1178	9
1 ............A......... 22	TGAGGTAGGAGGATGTATAGTT	5p	1	35	29	336	3	226	266	128		30	4	1057	9
1 ........C............. 22	TGAGGTAGCAGGTTGTATAGTT	5p	1	3	10	121	19	112	154	82		373	105	979	9
1 .....................A 21	TGAGGTAGGAGGTTGTATAGTA	5p	1	3	7	134	30	112	183	100	6	110	40	725	10
1 .................G.... 22	TGAGGTAGGAGGTTGTAGAGTT	5p	1	24	19	240		57	117	18		19	4	498	8
1 .................C.... 22	TGAGGTAGGAGGTTGTACAGTT	5p	1	12	13	182	4	58	87	75		38	7	476	9
1 ................G..... 22	TGAGGTAGGAGGTTGTGTAGTT	5p	1	4	9	156	5	55	123	51	3	52	5	463	10
1 .....................G 21	TGAGGTAGGAGGTTGTATAGTG	5p	1	18	14	136	9	27	77	11		12	4	308	9
1 .......T........... 19	GAGGTAGTAGGTTGTATAG	5p	1			20	17	41	43	45	13	70		249	7
1 ......T............ 19	AGGTAGTAGGTTGTATAGT	5p	1			24	3	38	28	54	10	43		200	7
1 .....................A 21	GAGGTAGGAGGTTGTATAGTTA	5p	1	4		41	6	35	27	26	10	50		199	8
1 .....................T 21	GAGGTAGGAGGTTGTATAGTTT	5p	1	11		43		36	27	27	6	28		178	7
1 ..................G.. 21	TGAGGTAGGAGGTTGTATGGT	5p	1	6	3	34	9	16	34	18		44	5	169	9
1 ............C......... 22	TGAGGTAGGAGGCTGTATAGTT	5p	1	3	3	38		30	43	12		34	5	168	8
1 ..........A.......... 21	GAGGTAGGAGATTGTATAGTT	5p	1	9	9	29		8	15	18	20	55		163	8
1 ........T............... 24	TGAGGTAGTAGGTTGTATAGTTGA	5p	1			20	5	15	37	28		29	23	157	7
1 ...............G..... 21	TGAGGTAGGAGGTTGGATAGT	5p	1	7	4	71		13	43	9		10		157	7
1 .........T............ 22	CTGAGGTAGTAGGTTGTATAGT	5p	1			18	6	27	43	31		19	6	150	7
1 ...........A......... 21	TGAGGTAGGAGATTGTATAGT	5p	1	6		26		20	27	8		55	3	145	7
1 .......................T 23	TGAGGTAGGAGGTTGTATAGTTGT	5p	1			37	3	21	30	16		21	6	134	7
1 ...................T.. 22	TGAGGTAGGAGGTTGTATATTT	5p	1	5		26	3	26	10	24		24	7	125	8
1 ............G......... 22	TGAGGTAGGAGGGTGTATAGTT	5p	1		3	47		17	32	13		13		125	6
1 ......................C 22	TGAGGTAGGAGGTTGTATAGTTC	5p	1	4		20	9	19	30	14		17	11	124	8
1 .......T.............. 22	GAGGTAGTAGGTTGTATAGTTG	5p	1			17		14	28	17	7	39		122	6
1 .................G... 21	GAGGTAGGAGGTTGTATGGTT	5p	1	20		22		6	8	9	17	39		121	7
1 ...........T.......... 22	TGAGGTAGGAGTTTGTATAGTT	5p	1	3	4	26	6	21	10	16		19	9	114	9
1 ..G................... 22	TGGGGTAGGAGGTTGTATAGTT	5p	1	5		18		11	14	11		52		111	6
1 .......... ........... 21	TGAGGTAGGAGTTGTATAGTT	5p	1			15	3	37	7	17		17	9	105	7
1 ...............C...... 22	TGAGGTAGGAGGTTGCATAGTT	5p	1		5	35	4	12	17	17		11	4	105	8
1 ........C............ 21	TGAGGTAGCAGGTTGTATAGT	5p	1			10		8	17	9		42	14	100	6
1 ..................T... 22	TGAGGTAGGAGGTTGTATTGTT	5p	1	7		44	9	8	11	7		6		92	7
1 .....G................ 22	TGAGGGAGGAGGTTGTATAGTT	5p	1	11	5	27		6	10	15		14	3	91	8
2 C..................... 22	CGAGGTAGGAGGTTGTATAGTT	5p	1	3	3	17	7	11	10	10	3	19	4	87	10
1 ................C..... 22	TGAGGTAGGAGGTTGTCTAGTT	5p	1		3	16		10	11	8		18	14	80	7
1 ..................C... 22	TGAGGTAGGAGGTTGTATCGTT	5p	1			23		8	14	3		10	20	78	6
1 ............ ......... 21	TGAGGTAGGAGGTGTATAGTT	5p	1			16	4	16	5	15		12	6	74	7
1 ....................A 20	TGAGGTAGGAGGTTGTATAGA	5p	1			9	6	10	21	8		15	5	74	7
1 ............A........ 21	TGAGGTAGGAGGATGTATAGT	5p	1			24		18	20	6		5		73	5
2 T.................... 21	TAGGTAGGAGGTTGTATAGTT	5p	1							4		3	64	71	3
1 ........A............ 21	TGAGGTAGAAGGTTGTATAGT	5p	1			3		9	10	20		23	5	70	6
2 A..................... 22	AGAGGTAGGAGGTTGTATAGTT	5p	1	3	4	12		8	5	4		26	7	69	8
1 .........C............ 22	TGAGGTAGGCGGTTGTATAGTT	5p	1			12		4	5	5		17	16	59	6
1 ...................A 19	TGAGGTAGGAGGTTGTATAA	5p	1			8	7	3	14	11		9	5	57	7
1 .....................C 21	TGAGGTAGGAGGTTGTATAGTC	5p	1			10	13	7	7	7		12		56	6
1 .....C................ 22	TGAGGCAGGAGGTTGTATAGTT	5p	1	3	4	14		5	8	8		9		51	7
1 ..C................... 22	TGCGGTAGGAGGTTGTATAGTT	5p	1			8				3		22	16	49	4
1 ......C............... 22	TGAGGTCGGAGGTTGTATAGTT	5p	1			5			3			26	12	46	4
1 .......T.............. 22	TGAGGTATGAGGTTGTATAGTT	5p	1			13		9	3	6		7	7	45	6
2 G..................... 22	GGAGGTAGGAGGTTGTATAGTT	5p	1	3		10		7	6			13	5	44	6
1 ..........T........... 22	TGAGGTAGGATGTTGTATAGTT	5p	1			12		11	7	5		4	4	43	6
1 ..............T....... 22	TGAGGTAGGAGGTTTTATAGTT	5p	1	6		12		7	5	8		5		43	6
1 .............C........ 22	TGAGGTAGGAGGTCGTATAGTT	5p	1			10		6	10	4		9	4	43	6
1 ...............A...... 22	TGAGGTAGGAGGTTGAATAGTT	5p	1	3	3	11		9	7	4		3		40	7
1 .......T.......... 18	GAGGTAGTAGGTTGTATA	5p	1			5		5	4	11		15		40	5
1 ....T................. 22	TGAGTTAGGAGGTTGTATAGTT	5p	1			12		9	6	6		7		40	5
1 .................G... 21	TGAGGTAGGAGGTTGTAGAGT	5p	1			17		7	14					38	3
1 ................N..... 22	TGAGGTAGGAGGTTGTNTAGTT	5p	1			12		10	16					38	3
1 ...T.................. 22	TGATGTAGGAGGTTGTATAGTT	5p	1			11		4	5	7		6	5	38	6
1 ...............G....... 23	TGAGGTAGGAGGTTGGATAGTTG	5p	1	5		9		9	7	3		4		37	6
1 ................T..... 22	TGAGGTAGGAGGTTGTTTAGTT	5p	1	3		6	6	3	7	5		6		36	7
1 .........G............ 22	TGAGGTAGGGGGTTGTATAGTT	5p	1			9		7	8			10		34	4
1 ....G................ 21	GAGGGAGGAGGTTGTATAGTT	5p	1	5		11		6	4			7		33	5
1 ....................G 20	TGAGGTAGGAGGTTGTATAGG	5p	1	4		7	5	4	5	5		3		33	7
1 ......G............... 22	TGAGGTGGGAGGTTGTATAGTT	5p	1			6		4	4			18		32	4
1 ....................T 20	AGGTAGGAGGTTGTATAGTTT	5p	1	3		6		4	5		8	6		32	6
1 ................G.... 21	TGAGGTAGGAGGTTGTGTAGT	5p	1			8	4	3	8	4		4		31	6
1 ............A.......... 23	TGAGGTAGGAGGATGTATAGTTG	5p	1			8		7	8	3		3		29	5
1 .........A.......... 20	AGGTAGGAGATTGTATAGTT	5p	1			7		6		3	5	8		29	5
1 ....................A 20	AGGTAGGAGGTTGTATAGTTA	5p	1			6		8		3	3	8		28	5
1 .......C............. 21	GAGGTAGCAGGTTGTATAGTT	5p	1			3				7	5	13		28	4
1 ................G... 20	AGGTAGGAGGTTGTATGGTT	5p	1	3							5	14		22	3
1 .....A................ 22	TGAGGAAGGAGGTTGTATAGTT	5p	1	3	5			3	3	5		3		22	6
1 ...........C.......... 22	TGAGGTAGGAGCTTGTATAGTT	5p	1			3				3		12	4	22	4
1 ..........C........... 22	TGAGGTAGGACGTTGTATAGTT	5p	1			4	3	4	3	3		3		20	6
1 ...................T 19	TGAGGTAGGAGGTTGTATAT	5p	1				6		4	5		5		20	4
1 ......T........... 18	AGGTAGTAGGTTGTATAG	5p	1			6				4		8		18	3
1 ...........G......... 21	GAGGTAGGAGGGTGTATAGTT	5p	1			5		5		5		3		18	4
1 ...............G.... 20	TGAGGTAGGAGGTTGGATAG	5p	1			6	3	3	5					17	4
1 ...................A.. 22	TGAGGTAGGAGGTTGTATAATT	5p	1			3	4	3		4		3		17	5
1 ..............A....... 22	TGAGGTAGGAGGTTATATAGTT	5p	1			3		6	3	5				17	4
1 .................C... 21	TGAGGTAGGAGGTTGTACAGT	5p	1			7		3	3			3		16	4
1 ................G 16	TGAGGTAGGAGGTTGTG	5p	1			3			4	3		6		16	4
1 ............G........ 21	TGAGGTAGGAGGGTGTATAGT	5p	1			4		4	5			3		16	4
1 ..............G...... 21	GAGGTAGGAGGTTGGATAGTT	5p	1			12						3		15	2
1 ................G...... 23	TGAGGTAGGAGGTTGTGTAGTTG	5p	1			3		4	5			3		15	4
1 ..............C....... 22	TGAGGTAGGAGGTTCTATAGTT	5p	1			6			3			6		15	3
1 .............G........ 22	TGAGGTAGGAGGTGGTATAGTT	5p	1			11						3		14	2
1 ......T.............. 21	AGGTAGTAGGTTGTATAGTTG	5p	1				3	4	3			3		13	4
1 ....A................. 22	TGAGATAGGAGGTTGTATAGTT	5p	1			4		5				3		12	3
1 ..................G.... 23	TGAGGTAGGAGGTTGTATGGTTG	5p	1			7						4		11	2
1 ...........A........ 20	TGAGGTAGGAGATTGTATAG	5p	1			3				3		5		11	3
1 ....................A 20	GAGGTAGGAGGTTGTATAGTA	5p	1					7	4					11	2
1 .........T........... 21	CTGAGGTAGTAGGTTGTATAG	5p	1					4		5				9	2
2 T................... 20	TAGGTAGGAGGTTGTATAGT	5p	1										9	9	1
1 ..........A........... 22	TGAGGTAGGAAGTTGTATAGTT	5p	1			3		5						8	2
1 ............C........ 21	TGAGGTAGGAGGCTGTATAGT	5p	1					3				5		8	2
1 ......C.............. 21	TGAGGTCGGAGGTTGTATAGT	5p	1									4	4	8	2
1 ...C.................. 22	TGACGTAGGAGGTTGTATAGTT	5p	1					3		4				7	2
1 ........C........... 20	TGAGGTAGCAGGTTGTATAG	5p	1									3	4	7	2
1 .....T............. 19	GGTAGTAGGTTGTATAGTT	5p	1								3	4		7	2
1 ....C................. 22	TGAGCTAGGAGGTTGTATAGTT	5p	1				3					4		7	2
1 .................G.. 20	TGAGGTAGGAGGTTGTAGAG	5p	1			4			3					7	2
1 .......C.............. 22	TGAGGTACGAGGTTGTATAGTT	5p	1					3				4		7	2
1 .......A............. 21	GAGGTAGAAGGTTGTATAGTT	5p	1							4		3		7	2
1 .....G............... 21	TGAGGGAGGAGGTTGTATAGT	5p	1	3					3					6	2
1 ................C...... 23	TGAGGTAGGAGGTTGTCTAGTTG	5p	1									3	3	6	2
2 T..................... 22	TAGGTAGGAGGTTGTATAGTTG	5p	1										6	6	1
2 C.................... 21	CGAGGTAGGAGGTTGTATAGT	5p	1			3						3		6	2
1 ...................C.. 22	TGAGGTAGGAGGTTGTATACTT	5p	1			3						3		6	2
1 .................G..... 23	TGAGGTAGGAGGTTGTAGAGTTG	5p	1						3			3		6	2
1 ....................A.. 23	TGAGGTAGGAGGTTGTATAGATG	5p	1			3				3				6	2
1 ......T.......... 17	AGGTAGTAGGTTGTATA	5p	1							3		3		6	2
2 C...................... 23	CGAGGTAGGAGGTTGTATAGTTG	5p	1									5		5	1
1 .............A........ 22	TGAGGTAGGAGGTAGTATAGTT	5p	1									5		5	1
1 ........C............ 21	GAGGTAGGCGGTTGTATAGTT	5p	1									5		5	1
2 C.................. 19	CGGTAGGAGGTTGTATAGT	5p	1										5	5	1
1 ...........A...... 18	TGAGGTAGGAGATTGTAT	5p	1									5		5	1
2 C................... 20	CGGTAGGAGGTTGTATAGTT	5p	1										5	5	1
1 ..G.................. 21	TGGGGTAGGAGGTTGTATAGT	5p	1									5		5	1
2 A.................... 21	AGAGGTAGGAGGTTGTATAGT	5p	1									4		4	1
1 ............A....... 20	TGAGGTAGGAGGATGTATAG	5p	1					4						4	1
1 ..T................... 22	TGTGGTAGGAGGTTGTATAGTT	5p	1									4		4	1
1 .................A.... 22	TGAGGTAGGAGGTTGTAAAGTT	5p	1					4						4	1
1 ................C.... 21	GAGGTAGGAGGTTGTACAGTT	5p	1			4								4	1
1 .................T... 21	GAGGTAGGAGGTTGTATTGTT	5p	1								3			3	1
1 .........C........... 21	TGAGGTAGGCGGTTGTATAGT	5p	1										3	3	1
1 ...........A........... 23	TGAGGTAGGAGATTGTATAGTTG	5p	1						3					3	1
1 ...A.................. 22	TGAAGTAGGAGGTTGTATAGTT	5p	1						3					3	1
1 ..................G 18	TGAGGTAGGAGGTTGTATG	5p	1				3							3	1
1 ...T................. 21	TGATGTAGGAGGTTGTATAGT	5p	1									3		3	1
1 ...........T......... 21	TGAGGTAGGAGTTTGTATAGT	5p	1					3						3	1
1 ......................T 22	GAGGTAGGAGGTTGTATAGTTGT	5p	1					3						3	1
1 ......G.............. 21	TGAGGTGGGAGGTTGTATAGT	5p	1									3		3	1
1 .............G...... 20	AGGTAGGAGGTTGGATAGTT	5p	1			3								3	1
1 ..................C.. 21	TGAGGTAGGAGGTTGTATCGT	5p	1										3	3	1
1 ....................C 20	TGAGGTAGGAGGTTGTATAGC	5p	1				3							3	1
2 G.................... 21	GGAGGTAGGAGGTTGTATAGT	5p	1						3					3	1
2 T................... 20	TGGTAGGAGGTTGTATAGTT	5p	1					3						3	1
1 ...............N...... 22	TGAGGTAGGAGGTTGNATAGTT	5p	1	3										3	1
1 .....C............... 21	TGAGGCAGGAGGTTGTATAGT	5p	1							3				3	1
1 .......... .......... 20	TGAGGTAGGAGTTGTATAGT	5p	1										3	3	1
1 .......T............... 23	GAGGTAGTAGGTTGTATAGTTGA	5p	1									3		3	1
2 C.................... 21	CGGTAGGAGGTTGTATAGTTG	5p	1										3	3	1
1 ..................T.. 21	TGAGGTAGGAGGTTGTATTGT	5p	1			3								3	1
1 ...................A... 23	TGAGGTAGGAGGTTGTATAATTG	5p	1				3							3	1
2 T.................. 19	TAGGTAGGAGGTTGTATAG	5p	1										3	3	1
1 ........... ........... 22	TGAGGTAGGAGTTGTATAGTTG	5p	1					3						3	1
1 ...............G..... 21	GAGGTAGGAGGTTGTGTAGTT	5p	1							3				3	1
1 ...T................... 23	TGATGTAGGAGGTTGTATAGTTG	5p	1										3	3	1
1 ................C... 20	AGGTAGGAGGTTGTATCGTT	5p	1									3		3	1
1 ......................C 22	AGGTAGGAGGTTGTATAGTTGAC	5p	1				3							3	1
1 ....T.................. 23	TGAGTTAGGAGGTTGTATAGTTG	5p	1									3		3	1
1 .......................C 23	TGAGGTAGGAGGTTGTATAGTTGC	5p	1			3								3	1
1 .....................C 21	GAGGTAGGAGGTTGTATAGTTC	5p	1			3								3	1
1 .........T............ 22	TGAGGTAGGTGGTTGTATAGTT	5p	1			3								3	1
cluster No. 6
38550129 TATCAGAGTGAGGTAGTAGATTGTATAGTTGTGGGGTAGTGATTTTACCCTGTTCAGGAGATAACTATACAATCTATTGCCTTCCCTGA 38550217 new hairpin
1 .............................................................................. 78 cfa-let-7f
1 .....................................................T.................................. 88 mmu-let-7f-1
1 ...................................................................................... 86 ptr-let-7f-1
1 ....................................................................................... 87 hsa-let-7f-1
1 .....................T 21	CTATACAATCTATTGCCTTCCT	3p	1									3		3	1
cluster No. 7
28999414 TTCCAGGCTGAGGTAGTAGTTTGTACAGTTTGAGGGTCTATGATACCACCCGGTACAGGAGATAACTGTACAGGCCACTGCCTTGCCAG 28999502 new hairpin
1 ............................................................................... 79 cfa-let-7g
1 ..............................C........CA.............T................................. 88 oan-let-7g
1 ................................................................................... 83 mdo-let-7g
1 .................................................................................... 84 hsa-let-7g
1 ....................................................................................... 87 mmu-let-7g
1 ...................... 22	TGAGGTAGTAGTTTGTACAGTT	5p	0	749	391	34453	6896	58513	61513	42196	3588	53760	39566	301625	10
1 ..................... 21	TGAGGTAGTAGTTTGTACAGT	5p	0	26	7	1500	2094	3428	3986	3085	203	3809	2583	20721	10
1 ..................... 21	GAGGTAGTAGTTTGTACAGTT	5p	0	46	19	1143	159	1710	926	1363	1035	1899	40	8340	10
1 ....................... 23	TGAGGTAGTAGTTTGTACAGTTT	5p	0	14	11	742	140	1337	1478	1010	100	1107	758	6697	10
1 .................... 20	TGAGGTAGTAGTTTGTACAG	5p	0			146	1339	284	297	227	24	299	224	2840	8
1 ....................... 23	CTGAGGTAGTAGTTTGTACAGTT	5p	0	32	7	238	34	255	299	233	87	187	112	1484	10
1 .................... 20	AGGTAGTAGTTTGTACAGTT	5p	0	6	3	132	22	187	79	107	119	225	3	883	10
1 .................... 20	GAGGTAGTAGTTTGTACAGT	5p	0	5		66	86	139	74	120	82	155	4	731	9
1 ................... 19	TGAGGTAGTAGTTTGTACA	5p	0			6	221	9	10	16		29	8	299	7
1 ...................... 22	CTGAGGTAGTAGTTTGTACAGT	5p	0			34	16	59	35	37	10	28	21	240	8
1 ...................... 22	GAGGTAGTAGTTTGTACAGTTT	5p	0			32	4	45	38	38	21	51		229	7
1 .................. 18	TGAGGTAGTAGTTTGTAC	5p	0			6	117	10	6	6		21	6	172	7
1 ................... 19	GAGGTAGTAGTTTGTACAG	5p	0			3	56	11	4	10	6	13		103	7
1 ...................... 23	TGAGGTAGTAGTTTGTACAGTT	5p	0			7		21	12	14	3	18	20	101	7
1 ................... 19	AGGTAGTAGTTTGTACAGT	5p	0			11	4	17	4	9	6	17		68	7
1 ................. 17	TGAGGTAGTAGTTTGTA	5p	0				26		5	3		13	5	52	5
1 ..................... 21	CTGAGGTAGTAGTTTGTACAG	5p	0				17		3	5		7		32	4
1 ........................ 24	CTGAGGTAGTAGTTTGTACAGTTT	5p	0			9		3		7		5		24	4
1 ................ 16	TGAGGTAGTAGTTTGT	5p	0				10			3		8		21	3
1 .................. 18	GAGGTAGTAGTTTGTACA	5p	0				16					3		19	2
1 ........................ 24	TGAGGTAGTAGTTTGTACAGTTTG	5p	0				7							7	1
1 ..................... 21	AGGTAGTAGTTTGTACAGTTT	5p	0					3		3				6	2
1 .................. 18	AGGTAGTAGTTTGTACAG	5p	0				6							6	1
1 ......................... 25	TGAGGTAGTAGTTTGTACAGTTTGA	5p	0				4							4	1
1 ................. 17	GAGGTAGTAGTTTGTAC	5p	0				4							4	1
1 ................ 16	GAGGTAGTAGTTTGTA	5p	0				3							3	1
1 ...........G.......... 22	TGAGGTAGTAGGTTGTACAGTT	5p	1	64	171	3920	133	2490	3583	3502	100	1921	295	16179	10
1 ......................A 22	TGAGGTAGTAGTTTGTACAGTTA	5p	1	17	15	1287	554	2258	2411	1912	131	1780	1137	11502	10
1 .................T.... 22	TGAGGTAGTAGTTTGTATAGTT	5p	1	18	49	541	127	925	727	616	186	1625	483	5297	10
1 ........... .......... 21	TGAGGTAGTAGTTGTACAGTT	5p	1	16	8	398	100	1173	642	813	97	897	938	5082	10
1 .....................A 21	TGAGGTAGTAGTTTGTACAGTA	5p	1			81	1414	179	260	221	12	278	151	2596	8
1 ...........A.......... 22	TGAGGTAGTAGATTGTACAGTT	5p	1		53	561	29	553	396	477	14	280	74	2437	9
1 .................A.... 22	TGAGGTAGTAGTTTGTAAAGTT	5p	1			68	40	108	113	93	4	167	1821	2414	8
1 ...............G...... 22	TGAGGTAGTAGTTTGGACAGTT	5p	1	34	23	486	19	316	412	94	6	134	18	1542	10
1 ..................C... 22	TGAGGTAGTAGTTTGTACCGTT	5p	1		3	88	34	99	110	60	4	196	888	1482	9
2 T.................... 21	TAGGTAGTAGTTTGTACAGTT	5p	1			3	4	14	4	6		18	1112	1161	7
1 ........G............. 22	TGAGGTAGGAGTTTGTACAGTT	5p	1	16	9	224	7	118	154	29	4	237	22	820	10
1 ................G..... 22	TGAGGTAGTAGTTTGTGCAGTT	5p	1		17	151	12	117	134	133	17	132	27	740	9
1 ......................G 22	TGAGGTAGTAGTTTGTACAGTTG	5p	1			52	61	113	163	113	4	119	101	726	8
1 .....................C 21	TGAGGTAGTAGTTTGTACAGTC	5p	1			29	510	32	39	26	5	59	23	723	8
1 ................C..... 22	TGAGGTAGTAGTTTGTCCAGTT	5p	1			46	9	75	61	44	5	208	246	694	8
2 C..................... 22	CGAGGTAGTAGTTTGTACAGTT	5p	1			68	36	76	71	68	41	224	67	651	8
1 ...........G......... 21	TGAGGTAGTAGGTTGTACAGT	5p	1			72	143	79	91	132	3	90	18	628	8
1 ...................A 19	TGAGGTAGTAGTTTGTACAA	5p	1				580	3	5	7		24	4	623	6
2 A..................... 22	AGAGGTAGTAGTTTGTACAGTT	5p	1			38	20	43	32	37	11	328	99	608	8
1 ......C............... 22	TGAGGTCGTAGTTTGTACAGTT	5p	1			9		8	6	10		258	295	586	6
1 ..................T... 22	TGAGGTAGTAGTTTGTACTGTT	5p	1		8	68	44	141	63	109	13	56	20	522	9
1 .....................G 21	TGAGGTAGTAGTTTGTACAGTG	5p	1	4	4	92	231	69	61	15		30	15	521	9
1 ..............T....... 22	TGAGGTAGTAGTTTTTACAGTT	5p	1	4	5	46	16	108	64	76	11	113	68	511	10
1 ...........A..... 17	TGAGGTAGTAGATTGTA	5p	1			29	46	45	45	60	9	179	66	479	8
1 ....T................. 22	TGAGTTAGTAGTTTGTACAGTT	5p	1			36	7	68	72	64	5	116	87	455	8
1 ....................A 20	TGAGGTAGTAGTTTGTACAGA	5p	1				366	17	22	20		20	6	451	6
1 ...................T.. 22	TGAGGTAGTAGTTTGTACATTT	5p	1			44	67	75	42	55	4	90	64	441	8
2 G..................... 22	GGAGGTAGTAGTTTGTACAGTT	5p	1		4	53		34	16	19	4	122	181	433	8
1 ..................G... 22	TGAGGTAGTAGTTTGTACGGTT	5p	1		6	68	19	60	76	53	22	94	27	425	9
1 .....G................ 22	TGAGGGAGTAGTTTGTACAGTT	5p	1	9	9	68	12	46	63	76	16	103	21	423	10
1 ..G................... 22	TGGGGTAGTAGTTTGTACAGTT	5p	1			23	3	54	66	39		200	35	420	7
1 ..C................... 22	TGCGGTAGTAGTTTGTACAGTT	5p	1			16	6	9	20	8		148	202	409	7
1 ......................C 22	TGAGGTAGTAGTTTGTACAGTTC	5p	1			25	46	51	70	55	4	74	62	387	8
1 .................T... 21	TGAGGTAGTAGTTTGTATAGT	5p	1			24	60	66	42	30		98	48	368	7
1 .....................A 21	GAGGTAGTAGTTTGTACAGTTA	5p	1			39	17	87	42	65	40	66		356	7
1 .................G.... 22	TGAGGTAGTAGTTTGTAGAGTT	5p	1	8	6	51	47	54	40	15	5	79	51	356	10
1 .....C................ 22	TGAGGCAGTAGTTTGTACAGTT	5p	1	8	5	34	9	52	37	45	10	116	35	351	10
1 ...........G........... 23	TGAGGTAGTAGGTTGTACAGTTT	5p	1		6	71		54	87	87		38	3	346	7
1 ...............C...... 22	TGAGGTAGTAGTTTGCACAGTT	5p	1		7	42	13	67	58	57		56	27	327	8
1 ........C............. 22	TGAGGTAGCAGTTTGTACAGTT	5p	1			20	7	35	42	21		136	57	318	7
1 .........C............ 22	TGAGGTAGTCGTTTGTACAGTT	5p	1			19	4	12	14	14	9	70	140	282	8
1 ...T.................. 22	TGATGTAGTAGTTTGTACAGTT	5p	1			22	5	46	33	33		63	55	257	7
1 ..............A....... 22	TGAGGTAGTAGTTTATACAGTT	5p	1			25	4	46	52	40		48	32	247	7
1 .................A... 21	TGAGGTAGTAGTTTGTAAAGT	5p	1				77	13	5	5		11	124	235	6
1 ........A............. 22	TGAGGTAGAAGTTTGTACAGTT	5p	1		4	19		18	26	40		101	25	233	7
1 ...................A.. 22	TGAGGTAGTAGTTTGTACAATT	5p	1			11	154	18	13	14		13	10	233	7
1 ....................C 20	TGAGGTAGTAGTTTGTACAGC	5p	1			4	194	7	8	5		9	3	230	7
1 ...........C.......... 22	TGAGGTAGTAGCTTGTACAGTT	5p	1			30	7	36	26	27		65	23	214	7
1 .............C........ 22	TGAGGTAGTAGTTCGTACAGTT	5p	1			21	7	45	27	24	6	54	20	204	8
1 .......T.............. 22	TGAGGTATTAGTTTGTACAGTT	5p	1			23	3	21	23	21		71	34	196	7
1 .................T..... 23	TGAGGTAGTAGTTTGTATAGTTT	5p	1			20		33	31	26	4	53	27	194	7
1 ...A.................. 22	TGAAGTAGTAGTTTGTACAGTT	5p	1			13	8	39	28	29	3	40	32	192	8
1 ..........T........... 22	TGAGGTAGTATTTTGTACAGTT	5p	1			21		36	23	22		54	31	187	6
1 .....A................ 22	TGAGGAAGTAGTTTGTACAGTT	5p	1	6	12	17	3	28	20	19	6	56	17	184	10
1 ...........G........ 20	TGAGGTAGTAGGTTGTACAG	5p	1			8	136	5	8	6		11		174	6
2 C................... 20	CGGTAGTAGTTTGTACAGTT	5p	1										174	174	1
1 .........G............ 22	TGAGGTAGTGGTTTGTACAGTT	5p	1			10	4	23	32	27	3	44	22	165	8
[truncated: 6,772 more rows]
